# Supplementary material
Source: publisher site journal article supplement (https://www.spandidos-publications.com/1824/downloadSupplementary)
Supplement: Supplementary file 1 [file downloadSupplementary]

## Sheet: IgAN VS Healthy Control.all
Table SI. Differentially expressed miRNAs in the PMBCs of patients with IgAN compared with healthy participants.
miRNA_ID	IgAN1	IgAN2	IgAN3	IgAN4	IgAN5	IgAN6	IgAN7	IgAN8	IgAN9	IgAN10	HC1	HC2	HC3	HC4	HC5	HC6	HC7	HC8	HC9	HC10	IgAN(Average）	HC(Average）	log2(foldchange)	P-value
hsa-miR-6782-5p	0	0.37	0.18	0.1	0.26	0.11	0.1	0.37	0	0	0	0	0	0	0	0	0	0	0	0	0.149	0	-3.8972	0.000324358
hsa-miR-5100	20.87	14.78	18.47	23.99	62.45	60.13	37.98	18.47	1.69	28.45	114.77	15.58	125.63	162.93	262.87	327.43	44.9	6.29	37.95	34.56	28.728	113.291	1.9795	0.000493526
hsa-miR-6843-3p	0.12	0.09	0	0	0.09	0	0	0.12	0	0.12	0.18	0.2	0.8	0.1	0.33	0.59	0	0.09	0.21	1.49	0.054	0.399	2.8854	0.000744547
hsa-miR-3120-5p	1.07	0.56	0.81	0.93	0.43	0.76	1.07	0.75	0	0.35	1.34	1.21	0.6	0.88	1.64	1.98	0.93	0.18	1.48	18.77	0.673	2.901	2.1079	0.000941252
hsa-miR-4742-5p	2.15	2.62	1.26	2.06	1.72	1.19	1.26	2.12	0.85	0.93	0.63	1.01	0.4	0.49	0.88	0.79	1.12	0.8	0.85	0.37	1.616	0.734	-1.1386	0.00109596
hsa-miR-204-5p	2.5	0.28	0.18	0.1	0.77	0.87	0.78	1.25	0.09	0.35	5.36	2.11	1	0.78	5.7	1.09	3.27	0.27	0.53	1.11	0.717	2.122	1.5654	0.00536092
hsa-miR-3121-3p	0.36	0.09	0.18	0.41	0.17	0	0	0	0.19	0.12	0.09	0	0	0	0	0	0.09	0	0.11	0	0.152	0.029	-2.3899	0.00588435
hsa-miR-873-5p	1.91	0.37	0.63	0	1.46	1.52	0.19	0.5	0.47	0.81	17.34	1.61	0.2	0.39	1.64	4.16	5.32	0.8	1.17	0.19	0.786	3.282	2.062	0.00596736
hsa-miR-4661-5p	1.91	1.68	0.45	2.47	1.29	2.17	1.45	1	0	0.81	2.23	2.11	1.61	1.85	2.19	3.67	2.15	0.09	1.91	24.71	1.323	4.252	1.6843	0.00608261
hsa-miR-671-3p	98.15	46.49	29.77	44.68	42.75	43.55	66.26	74.25	6.3	64.41	93.14	73.87	42.78	41.59	95.41	116.34	55.63	4.61	66.57	819.48	51.661	140.942	1.448	0.00642069
hsa-miR-184	0.48	0.84	0.72	Table SI.	0.6	0.76	0.48	0.5	0.47	0.23	0.45	0.8	1.41	1.66	0.77	1.49	0.75	0.35	0.64	8.55	0.57	1.687	1.5654	0.00710094
hsa-miR-3675-3p	0.36	0	0	0.1	0.09	0	0	0.12	0	0.12	0.09	0.3	0.2	0.2	0.44	0.2	0.09	0.09	0.21	1.67	0.079	0.349	2.1433	0.00775704
hsa-miR-1287-5p	6.08	4.4	7.62	5.46	7.66	10.83	8.14	8.11	3.57	8.79	24.76	5.23	26.01	13.18	39.04	8.13	8.96	16.13	8.27	2.79	7.066	15.25	1.1098	0.00911307
hsa-miR-6842-3p	33.63	26.1	24.75	15.96	20.56	24.81	16.95	20.71	4.7	14.69	28.16	24.82	26.81	36.02	32.24	58.97	16.89	3.01	22.79	237.3	20.286	48.701	1.2635	0.00967018
hsa-miR-1250-5p	1.31	1.31	0.45	0.51	3.18	1.84	2.91	2.37	0.66	4.39	13.05	2.81	5.82	2.73	7.46	5.05	3.92	1.06	4.77	0.37	1.893	4.704	1.3132	0.00986376
hsa-miR-122-5p	42.1	23.86	45.82	70.41	3.78	5.2	0.58	2	1.13	1.39	4.83	4.12	1.71	12.4	16.56	14.87	2.52	1.15	4.35	6.13	19.627	6.864	-1.5157	0.00992576
hsa-miR-4443	1.31	0.09	0.63	0.93	0.69	1.41	0.87	1.37	0.19	1.27	1.7	0.2	3.41	2.25	3.73	1.78	3.08	0.35	1.17	2.97	0.876	2.064	1.2364	0.0111788
hsa-miR-490-3p	0.12	0.09	0.18	0	0.69	0.65	0.48	0.25	0.09	0.69	0.54	0.1	0	0	0.33	0	0	0.09	0.11	0	0.324	0.117	-1.4695	0.013064
hsa-miR-1275	0.72	0.47	1.08	0.31	1.98	3.36	1.45	1.12	0.19	1.62	15.11	0.3	2.61	2.44	5.26	3.86	3.73	0.89	1.59	0.19	1.23	3.598	1.5485	0.0136434
hsa-miR-6500-3p	0.36	0.09	0	0	0.17	0.11	0	0.12	0	0	0.45	0.3	0.1	0.2	0.22	0.59	0.19	0.09	0.42	0.19	0.085	0.275	1.6939	0.0140063
hsa-miR-1260a	87.3	85.79	110.48	81.12	328.92	307.37	148.03	148.87	17.59	144.67	435.93	51.05	461.24	375.25	770.5	627.41	300.84	44.24	174.59	119.86	146.014	336.091	1.2027	0.0149845
hsa-miR-203a-3p	0.83	0.84	0.81	7.1	0.09	0.43	0.29	0	0	0	0.63	0.5	0.1	0.39	0.11	0.4	0.28	0.35	0.11	0.19	1.039	0.306	-1.7636	0.0157398
hsa-miR-6732-3p	0	0	0	0	0	0	0.1	0	0	0	0.18	0	0.1	0	0.33	0.3	0.09	0.09	0.11	0	0.01	0.12	3.585	0.0172492
hsa-miR-296-3p	0.24	0.09	0.18	0.21	0.17	0.33	0.39	0.25	0.09	0.35	1.7	0.2	0.4	0.39	0.99	0.89	0.28	0.18	0.64	0.19	0.23	0.586	1.3493	0.0175797
hsa-miR-224-5p	103.39	40.97	14.35	22.44	22.88	38.9	33.13	35.06	2.54	58.05	56.4	199.8	5.22	33.29	37.18	165.3	31.83	2.93	60.21	303.82	37.171	89.598	1.2693	0.019294
hsa-miR-1246	2.03	1.31	1.79	1.34	1.81	3.36	1.16	2.87	0.19	3.82	5.72	1.01	3.92	9.66	5.26	12.88	3.08	0.09	4.88	1.3	1.968	4.78	1.2803	0.0194418
hsa-miR-4664-3p	0.24	0.28	0.81	1.24	0.95	0.54	1.55	0.75	0.28	0.81	1.25	0.9	0.9	1.46	1.21	1.59	0.37	0	1.06	12.08	0.745	2.082	1.4827	0.0196749
hsa-miR-6754-3p	0.48	0.37	0.45	0.31	0.26	0.22	0.39	0.12	0	0.35	0.36	0.3	0.1	0.1	0	0.2	0.09	0	0	0	0.295	0.115	-1.3591	0.0201035
hsa-miR-7155-3p	0	0.09	0.36	0.1	1.03	0.54	0.19	0.12	0.09	0.12	0.54	0.3	1.21	0.88	0.88	0.59	0.56	0.35	0.74	0.37	0.264	0.642	1.282	0.0201686
hsa-miR-129-5p	0.24	0.94	1.8	1.02	1.04	0.44	1.74	2.24	0.38	1.16	3.76	1.4	3.42	2.14	1.76	1.78	0	0.54	1.9	10.78	1.1	2.748	1.3209	0.0232173
hsa-miR-1290	0	0	0.63	0.31	0.26	0.33	0.19	0.12	0	0.58	0.54	0.1	0.6	2.05	0.77	3.17	0.75	0	0.64	0	0.242	0.862	1.8327	0.023924
hsa-miR-6748-3p	0	0	0	0	0.17	0.11	0.19	0	0	0.12	0.09	0.3	0.2	0.59	0.33	0.2	0.19	0	0.21	0	0.059	0.211	1.8385	0.0242481
hsa-miR-548j-3p	0.6	0.37	0.09	0.1	0.09	0.11	0.19	0.25	3.48	0.12	0.27	0.5	0	0	0.22	0.2	0.19	0.44	0	0	0.54	0.182	-1.569	0.0242663
hsa-miR-548t-5p	0.12	0.28	0.36	0.1	0.09	0.54	0.19	0.25	0	0.35	0.72	0.4	0.2	0.49	0.55	0.4	0.56	0.53	0.53	0.74	0.228	0.512	1.1671	0.0256253
hsa-miR-148a-3p	5859.03	3616.16	3343.38	3532.16	3493.11	2203.95	2954.68	2137.56	4289.2	2584.67	3333.85	4438.52	2662.98	1831.33	1869.12	6616.9	2754.81	4361.15	3524.57	47146.2	3401.39	7853.94	1.2073	0.0260701
hsa-miR-200a-3p	1.55	1.12	0.99	14.62	0.6	4.23	0.19	1	0	0.58	3.58	0.3	0.4	2.34	1.54	0.99	0.93	0	0.64	0.19	2.488	1.091	-1.1893	0.0261597
hsa-miR-3074-3p	0.12	0.19	0.18	0	0.26	0	0.29	0.12	0	0.23	0.8	0.3	0.5	0.29	0.44	0.2	0.65	0.18	0.21	0	0.139	0.357	1.3608	0.0263899
hsa-miR-1260b	113.65	100.38	145.36	95.02	380.02	366.1	217.1	225.98	20.32	192.78	627.03	65.43	500.8	413.42	870.52	693.81	366.56	56.2	213.81	131.01	185.671	393.859	1.0849	0.0286219
hsa-miR-135a-3p	0.12	0	0	0.1	0.17	0.22	0	0	0	0	0.27	0.1	0.2	0.1	0.33	0.5	0.37	0.09	0.21	0	0.061	0.217	1.8308	0.0298318
hsa-miR-1233-3p	0	0	0.09	0	0	0.11	0.1	0.12	0	0	0.27	0.1	0.3	0.49	0.22	0	0.09	0	0.32	0	0.042	0.179	2.0915	0.0309135
hsa-miR-6772-3p	1.31	1.68	0.9	1.03	0.77	1.3	1.36	2	0.19	1.27	2.06	2.01	0.9	1.46	1.75	4.16	1.21	0.09	1.06	10.59	1.181	2.529	1.0986	0.0367437
hsa-miR-4741	0.12	0.19	0	0	0.09	0.22	0	0	0	0	0.27	0.1	0.1	0.39	0.33	0.1	0.09	0.09	0.11	0.56	0.062	0.214	1.7873	0.0372681
hsa-miR-664b-3p	2.5	2.25	3.32	2.37	3.44	4.98	2.81	3.99	1.88	3.59	5.99	0.9	2.51	2.05	2.19	1.98	2.33	1.24	3.07	0.19	3.113	2.245	-0.4716	0.0393031
hsa-miR-3605-3p	15.62	18.9	13.99	12.87	8.86	13.22	9.88	13.23	2.92	10.64	8.49	11.86	15.26	14.94	14.48	18.43	8.77	4.52	17.81	115.95	12.013	23.051	0.9402	0.0418865
hsa-miR-7705	0.36	0.09	0.18	0.1	0.34	0.33	0.58	0.75	0.47	0	0.54	0.2	0	0.2	0.11	0	0.19	0.09	0.21	0	0.32	0.154	-1.0551	0.0429788
hsa-miR-744-5p	478.57	249.78	273.06	255.81	395.42	439.99	532.63	596.09	73.74	454.95	1122.93	434.36	512.95	465.54	712.38	874.07	432.08	110.1	487.08	1168.27	375.004	631.976	0.753	0.0454548
hsa-miR-7704	0.72	1.31	1.43	0.82	2.41	1.95	2.33	1.25	0	0.81	5.72	0.5	3.72	3.32	3.07	5.25	2.71	0.53	1.17	1.11	1.303	2.71	1.0565	0.0485334
hsa-miR-1273h-3p	33.03	21.24	13.54	14.21	26.49	25.89	31.58	35.06	3.1	30.53	72.58	37.79	16.17	25.97	52.75	63.52	24.18	3.55	28.94	96.81	23.467	42.226	0.8475	0.0506305
hsa-miR-5701	0.72	0.94	1.26	0.72	1.03	5.2	1.55	1.87	0.09	0.58	6.79	0.1	2.91	5.86	7.02	8.23	3.08	0.18	0.85	0.37	1.396	3.539	1.342	0.0512128
hsa-miR-4746-5p	14.67	15.53	15.42	12.87	14.88	16.04	15.6	10.73	3.39	11.56	5.63	21.41	25.11	16.3	12.5	19.92	8.12	3.19	19.4	105.73	13.069	23.731	0.8606	0.0544887
hsa-miR-6784-3p	0.12	0	0	0	0.09	0	0	0	0	0	0	0	0.2	0	0.11	0	0.09	0	0.11	0.93	0.021	0.144	2.7776	0.0550287
hsa-miR-3146	0.83	0.65	0.63	0.41	0.09	0.54	0.1	0.5	0.66	0	0.18	0.3	0.3	0.49	0.44	0.1	0.19	0.09	0.11	0.19	0.441	0.239	-0.8838	0.0563493
hsa-miR-1266-5p	0	0	0	0	0	0	0	0	0	0	0.09	0.1	0	0	0	0	0	0	0.11	0.37	0	0.067	2.7442	0.0564589
hsa-miR-561-5p	0.12	0	0	0.1	0.26	0.11	0	0	0.47	0.12	0.09	0	0	0	0	0	0.09	0.09	0	0	0.118	0.027	-2.1278	0.0574651
hsa-miR-412-5p	0.36	0.47	1.17	0.31	1.55	1.95	0.48	1.87	0.75	1.39	1.88	0.2	0.3	0.2	0.77	0.69	1.59	0.53	0	0.19	1.03	0.635	-0.6978	0.06139
hsa-miR-665	0	0	0	0	0.26	0.22	0	0	0.09	0.35	0.18	0	0	0	0	0	0	0	0	0	0.092	0.018	-2.3536	0.0616874
hsa-miR-4505	0	0	0	0.1	0	0	0	0.25	0	0	0.09	0.1	0	0	0.22	0.5	0.09	0	0.11	0.37	0.035	0.148	2.0802	0.0621168
hsa-miR-188-3p	0	0	0	0	0	0	0	0	0	0	0	0	0.1	0.1	0.11	0	0	0.09	0.11	0	0	0.051	2.3505	0.062722
hsa-miR-4761-3p	0	0	0	0	0	0	0	0	0	0	0	0	0	0.1	0.11	0	0.09	0.09	0.11	0	0	0.05	2.3219	0.062722
hsa-miR-7856-5p	0	0	0	0	0.17	0	0.19	0	0	0	0.36	0.1	0	0.1	0.11	0.2	0.19	0	0	0.37	0.036	0.143	1.9899	0.0640982
hsa-miR-96-5p	231	271.76	116.49	141.65	340.71	111.92	266.03	301.1	493.34	408.57	185.83	243.71	87.97	186.45	109.66	76.9	159.15	259.74	138.33	256.99	268.257	170.473	-0.6541	0.065409
hsa-miR-6849-5p	0	0.19	0	0	0	0.33	0.1	0	0	0	0	0	0	0	0	0	0	0	0	0	0.062	0	-2.6323	0.0676032
hsa-miR-6735-3p	0.24	0.47	0.54	0	0.43	0.11	0.29	0.75	0	0.23	0.8	0.7	0.4	0.29	0.66	1.29	0.75	0.27	0.53	0.37	0.306	0.606	0.9858	0.0680425
hsa-miR-5690	0.83	1.03	1.17	0.41	2.06	3.25	1.16	2.25	0.47	1.5	2.23	2.01	2.11	2.15	2.41	2.48	1.12	0.53	1.91	7.43	1.413	2.438	0.7869	0.0707791
hsa-miR-124-3p	0	0	0	0	0	0	0.1	0.12	0	0	3.49	0	0	0	0	0	0	0	0	0	0.022	0.349	3.9877	0.0713078
hsa-miR-3692-3p	0	0.47	0.27	0	0.69	0.33	0.48	0.25	0.09	0.23	0.18	0.1	0.1	0.2	0.33	0.2	0.19	0.09	0.11	0	0.281	0.15	-0.9056	0.0717298
hsa-miR-4504	4.17	2.34	1.79	3.4	1.03	0.54	1.16	1	6.02	0.35	0.36	2.01	0.3	0.2	0.44	0.89	0.84	3.37	0.85	1.49	2.18	1.075	-1.02	0.0738826
hsa-miR-6762-3p	0.12	0.09	0.27	0.1	0.6	0.33	0.78	0.37	0.19	0.12	0.63	0.5	1.61	0.29	0.66	0.79	0.47	0.09	0.42	0.56	0.297	0.602	1.0193	0.0767079
hsa-miR-429	0.72	0.84	0.63	3.4	0.52	0.76	0.29	0.12	0.38	0.23	1.25	0.4	0.2	0.88	0.66	0.4	0.37	0.44	0	0.19	0.789	0.479	-0.72	0.0779163
hsa-miR-6894-5p	0.24	0.19	0.18	0.51	0.34	0.22	0	0.12	0.09	0.12	0	0	0.2	0	0.11	0	0.09	0.09	0.32	0	0.201	0.081	-1.3112	0.0790423
hsa-miR-6769b-3p	0.12	0	0	0	0.26	0	0.19	0.37	0	0	0.36	0.2	0.3	0.29	0.33	0.5	0	0	0.42	0	0.094	0.24	1.3523	0.0800248
hsa-miR-92b-5p	2.39	2.81	4.93	3.09	3.53	3.03	3	1.75	0.85	2.08	1.16	1.51	6.53	6.83	4.17	7.43	3.55	0.8	3.6	13.19	2.746	4.877	0.8287	0.083083
hsa-miR-6508-3p	0.48	0.19	0.09	0	0.09	0	0.1	0.12	0.19	0.23	0	0	0	0	0	0	0.09	0	0.21	0.19	0.149	0.049	-1.6045	0.0832041
hsa-miR-1303	22.42	2.71	7.53	4.01	20.99	11.16	6.68	8.73	1.03	5.9	31.73	13.47	40.77	23.14	26.87	7.14	8.49	3.63	9.22	2.04	9.116	16.65	0.869	0.0840142
hsa-miR-760	3.58	1.5	1.97	1.85	1.2	1.63	1.65	2.75	0.09	0.69	8.85	3.52	0.7	1.85	2.85	5.35	1.03	0.35	2.33	5.39	1.691	3.222	0.9301	0.0844049
hsa-miR-195-5p	5.25	3.84	3.68	3.09	2.75	4.66	3.39	1.5	5.74	1.85	4.02	1.21	2.11	2.05	1.64	1.78	3.17	5.85	1.06	0.19	3.575	2.308	-0.6313	0.0868052
hsa-miR-3131	0	0	0	0.1	0	0.22	0	0	0	0	0.09	0	0	0.39	0	0.4	0	0	0.11	0.56	0.032	0.155	2.2761	0.0872584
hsa-miR-664a-5p	15.26	15.25	13.63	13.18	6.8	9.43	9.11	10.73	9.5	8.56	9.3	7.84	7.13	10.05	11.62	8.52	9.71	3.55	5.94	12.82	11.145	8.648	-0.366	0.0877725
hsa-miR-548m	0	0	0	0	0	0.11	0	0.12	0	0.12	0	0	0.2	0	0.22	0.1	0.28	0.35	0	0	0.035	0.115	1.7162	0.0902409
hsa-miR-3190-3p	0.83	0.56	0.36	0.72	0.6	0.54	0.58	1	0.38	0.35	0.72	1.11	0.6	1.07	1.1	1.29	0.47	0.27	0.32	4.09	0.592	1.104	0.8991	0.0904932
hsa-miR-3200-5p	5.13	3.84	5.2	6.38	8.69	6.39	12.01	11.11	4.04	9.6	4.74	5.83	3.31	6.44	8.01	3.37	4.48	6.03	6.25	0.74	7.239	4.92	-0.5571	0.0908094
hsa-miR-486-3p	137.14	96.64	60.35	62.38	68.04	53.09	23.44	88.47	4.7	58.52	176.18	55.68	46.39	62.57	86.64	179.87	78.31	6.47	65.93	431.11	65.277	118.915	0.8653	0.0923899
hsa-miR-4660	0.12	0.47	0.63	0.41	0.26	0.98	1.65	1	0.66	0.69	0.27	0.2	0.1	0.29	0.66	0.4	0.28	0.35	1.06	0.56	0.687	0.417	-0.7203	0.0926808
hsa-miR-4709-3p	0	0	0	0.1	0.09	0	0.1	0.12	0	0	0.27	0.2	0.1	0.1	0	0.2	0.09	0	0.21	0.19	0.041	0.136	1.7299	0.0931027
hsa-miR-3150a-5p	1.91	2.43	1.61	1.75	2.32	1.41	2.13	1.5	0.28	2.54	1.61	3.62	2.11	1.46	2.08	1.68	1.68	0.18	0.74	17.1	1.788	3.226	0.8514	0.0953681
hsa-miR-3944-3p	0.24	0.09	0.27	0.1	0.43	0.43	0.48	0.25	0	0.23	0.45	0.4	1.1	0.78	0.33	0.4	0.19	0	0.32	1.11	0.252	0.508	1.0114	0.0970311
hsa-miR-4511	4.29	0.84	3.23	3.81	1.81	0.65	0.87	0.87	0.85	1.85	0.89	1.61	1.51	0.59	2.3	2.28	1.12	0.71	1.06	0.74	1.907	1.281	-0.574	0.0981668
hsa-miR-4791	0.12	0.09	0	0	0	0	0	0	0	0	0	0	0	0.2	0	0.5	0.19	0.18	0	0	0.021	0.107	2.3491	0.100448
hsa-miR-182-5p	4073.06	4683.38	2717.28	2731.07	1886.16	697.85	1270.36	1915.69	3905.53	2345.98	1096.83	2381.97	656.35	1749.04	747.14	1043.24	1420.86	2549.26	899.01	3803.44	2622.64	1634.71	-0.682	0.101127
hsa-miR-1299	2.62	0.09	4.39	5.66	2.15	1.52	0.29	29.57	2.92	3.93	1.25	2.81	2.11	4.59	0	1.19	1.4	0.09	3.82	5.95	5.314	2.321	-1.1951	0.101254
hsa-miR-4762-3p	0.24	0.37	0.9	0.21	0.34	0	0.19	0.12	0.47	0.23	0.09	0.1	0	0.1	0.11	0.4	0.09	0.44	0.11	0.19	0.307	0.163	-0.9134	0.102831
hsa-miR-504-5p	5.13	1.12	3.14	1.13	11.44	13	7.56	2.25	1.32	17.35	18.23	4.02	21.59	14.25	14.7	13.38	9.33	0.98	16.43	4.65	6.344	11.756	0.8899	0.103008
hsa-miR-933	0.12	0.84	0.27	0.51	0	1.08	1.45	1.25	0	0.12	1.52	0.4	2.81	0.49	0.55	0.69	1.03	0	1.17	3.34	0.564	1.2	1.0893	0.106284
hsa-miR-6789-3p	0	0.09	0	0.1	0.09	0.11	0.48	0.12	0	0	0.36	0.3	0.4	0.29	0.11	0	0.19	0	0.53	0.37	0.099	0.255	1.365	0.106799
hsa-let-7d-3p	398.79	321.62	396.71	172.84	430.85	677.15	421.71	570.89	47.69	596.73	1040.7	251.96	846.75	600.16	673.23	645.84	408.09	108.33	566.05	1226.06	403.498	636.717	0.6581	0.107474
hsa-miR-509-3p	0.24	0.38	0.36	0.2	0	0	0	0.24	0	0	0.36	0.2	0.6	0.98	0.66	0	0.38	0.36	0	0	0.142	0.354	1.3179	0.109385
hsa-miR-708-5p	2.5	0.09	0.27	0.21	0	0.22	0	0.12	1.6	1.85	0.72	0.3	0.5	0.29	0.11	0.5	1.12	0.09	0.11	0	0.686	0.374	-0.8752	0.109805
hsa-miR-3678-5p	0	0	0	0	0	0	0	0	0	0	0	0.3	0	0	0.11	0.1	0	0	0	0	0	0.051	2.3505	0.1107
hsa-miR-1255a	7.04	0.47	0.36	0.31	0.09	0.65	2.81	4.12	0.19	0	5.18	8.74	0	3.42	0.22	7.63	2.24	0.18	0.95	6.32	1.604	3.488	1.1207	0.111185
hsa-miR-7977	1.67	1.03	0.99	0.51	4.13	5.53	2.33	3.37	0.09	4.39	12.6	1.01	6.33	6.25	8.66	7.43	3.36	0.27	2.86	0.19	2.404	4.896	1.0262	0.115515
hsa-miR-937-3p	0.6	0.84	1.61	1.85	1.12	0.87	0.58	0.62	0	0.81	0.72	1.01	0.7	1.66	1.54	1.78	0.47	0	1.17	8.73	0.89	1.778	0.9984	0.118489
hsa-miR-4433b-3p	22.78	9.07	6.99	5.56	17.72	24.92	19.28	26.58	4.7	26.6	41.56	27.44	10.14	14.55	31.04	45.78	15.21	5.58	23.96	39.02	16.42	25.428	0.631	0.118678
hsa-miR-4487	0	0.18	0	0.42	0.52	0.97	0.38	0.24	0	0.7	0.54	0	0.2	0	0.44	0	0.38	0	0.22	0	0.341	0.178	-0.9379	0.119004
hsa-miR-3609	1.07	0.56	0.18	0.51	0	0.33	0.48	0.75	0.56	0.93	0.45	0.1	0.2	0.49	0.66	0.4	0.28	0	0.64	0.37	0.537	0.359	-0.5809	0.11958
hsa-miR-7113-3p	0.12	0.09	0.09	0	0.09	0	0.1	0.25	0	0.12	0	0	0	0	0.11	0	0.09	0	0	0	0.086	0.02	-2.1043	0.119608
hsa-miR-579-3p	0.24	0.09	0	0	0.09	0.11	0	0	0	0.12	0	0.1	0.1	0.2	0.11	0.1	0	0.98	0	0	0.065	0.159	1.2905	0.119886
hsa-miR-1288-3p	1.19	1.22	0.99	0.62	0.52	0.65	0.39	0.25	0.19	0.35	0.36	1.31	0.4	0.59	0.11	0.89	0.56	0.09	1.38	6.5	0.637	1.219	0.9363	0.121031
hsa-miR-106a-3p	0.48	0.37	0.36	0.41	0.6	0	0.58	0.62	3.57	0.46	1.16	0	0.3	0.59	0.33	0.4	1.03	17.29	0.11	0	0.745	2.121	1.5094	0.121534
hsa-miR-6881-5p	0.12	0	0.27	0.1	0.26	0.33	0	0.37	0	0.12	0	0	0.1	0.2	0.11	0	0.09	0.09	0	0	0.157	0.059	-1.412	0.125048
hsa-miR-522-3p	0.12	0.09	0	0.1	0	0	0.1	0	0	0	0	0	0	0	0	0	0	0	0	0	0.041	0	-2.0356	0.125266
hsa-miR-514a-3p	1.31	0.56	0.36	0.31	0.52	0.43	0.1	0.25	0.47	0	0.63	0.1	0.1	0.59	0.33	0.3	0.47	0.18	0	0	0.431	0.27	-0.6747	0.125695
hsa-miR-491-3p	0	0	0	0	0	0	0	0	0	0	0.18	0	0	0.1	0	0	0.09	0.09	0	0	0	0.046	2.2016	0.125707
hsa-miR-6515-5p	0.95	0.75	0.63	0.41	0.69	0.65	0.68	0.37	0.09	0.58	1.25	0.4	0.9	0.88	0.99	1.98	0.75	0.18	0.53	2.23	0.58	1.009	0.7988	0.126363
hsa-miR-664a-3p	29.93	33.12	29.95	16.16	26.15	24.38	25.87	30.7	30.19	32.27	55.42	21.81	19.08	16.3	22.92	15.36	26.7	20.66	25.76	2.04	27.872	22.605	-0.3022	0.128075
hsa-miR-126-5p	130.35	62.49	69.23	102.53	119.56	176.82	158.88	117.05	88.89	64.53	314.9	70.05	88.77	188.21	435.04	535.15	141.23	182.79	62.12	7.43	109.033	202.569	0.8936	0.128318
hsa-miR-6837-3p	1.31	0.47	0.63	0.31	0.52	0.54	0.97	0.25	0.09	0.23	1.61	0.5	1	0.78	1.21	1.29	0.75	0	0.74	1.49	0.532	0.937	0.8166	0.132009
hsa-miR-2355-3p	4.77	3.37	3.14	1.24	5.42	5.85	11.24	7.99	1.13	2.66	19.13	6.03	2.91	4.2	13.49	14.17	7.37	2.75	8.16	1.3	4.681	7.951	0.7643	0.132997
hsa-miR-1228-3p	0.12	0.09	0.18	0	0.09	0	0.1	0.25	0	0	0	0	0	0	0	0	0.09	0	0	0.19	0.083	0.028	-1.5677	0.133544
hsa-miR-589-5p	49.73	57.81	57.84	34.18	56.25	82.34	44.85	49.66	12.04	48.92	76.6	49.25	77.93	68.72	75.78	73.33	46.86	19.33	59.36	176.9	49.362	72.406	0.5527	0.133633
hsa-miR-577	0	0	0	0	0	0.11	0	0.12	0	0	0	0	0	0.1	0	0.2	0.09	0.53	0	0	0.023	0.092	2	0.135263
hsa-miR-3179	3.82	3.27	3.23	3.6	0.77	1.41	0.48	0.75	2.73	1.5	0.63	2.11	1.61	2.64	3.84	0.69	1.68	0.62	0.95	0.56	2.156	1.533	-0.492	0.135659
hsa-miR-627-5p	0.36	0.28	1.26	1.03	0.34	0	0.29	0.37	0.85	0.35	0.36	0.1	0.1	0.88	0.22	0.1	0.28	0.71	0.32	0	0.513	0.307	-0.7407	0.136033
hsa-miR-616-5p	1.07	0.75	0.45	0.31	0.77	0.76	0.29	0.5	0.94	0.23	0.98	0.6	0.1	0	0.33	0.4	0.75	0.44	0.53	0	0.607	0.413	-0.5556	0.137273
hsa-miR-7974	0.36	0.09	0	0.1	0.09	0.22	0.29	0	0	0.12	0.09	0	0	0	0	0	0	0	0	0.37	0.127	0.046	-1.4651	0.138482
hsa-miR-624-3p	0	0	0	0	0.09	0.22	0	0	0.09	0.12	0.09	0.2	0	0.1	0.22	0.4	0.09	0.18	0.11	0	0.052	0.139	1.4185	0.140547
hsa-miR-2115-3p	2.03	0.84	0.72	0.31	0.77	0.65	0.68	1.12	0.85	2.43	1.34	0.2	0.4	0.88	0.66	0.99	0.93	0.53	1.48	0	1.04	0.741	-0.489	0.141148
hsa-miR-4667-5p	0.12	0	0.18	0	0	0	0	0	0	0	0	0	0.3	0	0	0.3	0.19	0	0	0.56	0.03	0.135	2.1699	0.141577
hsa-miR-6777-5p	0	0	0	0	0	0.11	0	0	0	0	0	0	0.1	0.1	0.11	0	0.19	0	0	0.19	0.011	0.069	2.6491	0.141998
hsa-miR-1237-3p	0	0	0.09	0.1	0	0	0	0.12	0	0	0.45	0.1	0	0.2	0.33	0	0	0	0.11	0	0.031	0.119	1.9406	0.142325
hsa-miR-4742-3p	11.69	19.27	12.29	20.38	15.14	11.81	18.5	18.72	3.01	13.41	8.76	12.46	12.45	14.35	16.45	9.51	15.68	3.63	11.02	6.69	14.422	11.1	-0.3777	0.144838
hsa-miR-1261	0.95	0.37	0.45	0.31	1.29	1.08	0.58	0.25	0	0.35	2.06	0.1	0.8	1.17	1.32	1.88	1.12	0.44	0.32	0.56	0.563	0.977	0.7952	0.145844
hsa-miR-148a-5p	13	8.14	6.19	4.32	27.78	25.03	18.41	15.6	3.57	18.97	47.46	19.5	22.09	12.98	23.47	16.55	11.67	6.74	16.75	34.01	14.101	21.122	0.5829	0.146301
hsa-miR-548ac	3.7	1.12	0.9	1.75	0.77	0.33	0.48	0.5	1.03	0.23	0.36	0.7	0.2	0.68	0.44	0.4	0.56	1.95	0.42	0	1.081	0.571	-0.9208	0.148034
hsa-miR-5583-3p	0	0.09	0.36	0.1	0.09	0	0	0.25	0.19	0.12	0.09	0	0	0.1	0	0.2	0	0.09	0.11	0	0.12	0.059	-1.0242	0.149688
hsa-miR-6852-5p	14.79	6.64	8.34	6.18	12.39	9.97	9.01	10.11	2.63	10.52	28.87	8.94	11.75	10.54	21.06	23.59	10.73	2.22	8.69	12.82	9.058	13.921	0.62	0.149866
hsa-miR-4477a	0	0	0	0	0	0	0	0	0	0	0	0.1	0	0	0	0	0	0.27	0	0	0	0.037	1.8875	0.150109
hsa-miR-6741-5p	1.31	0.56	1.17	1.44	0.69	0.98	0.78	0.75	0.09	0.46	0.89	0.8	2.01	1.95	1.97	1.09	0.84	0.18	0.53	3.53	0.823	1.379	0.7447	0.15026
hsa-miR-3139	0.36	0.56	0.18	0.1	0.43	0.98	0.78	0.87	0.47	0.46	0.72	0.2	0.3	0.2	0.33	0.59	0.37	0.44	0.21	0.19	0.519	0.355	-0.5479	0.151469
hsa-miR-423-3p	8304.25	5802.51	5788.41	4861.36	5496.16	7122.59	7177.97	7417.55	1011.61	7386.15	9770.67	7644.59	10892.7	6656.82	8493.52	8513.4	5970.46	1343.2	7937.55	20170.6	6036.86	8739.35	0.5337	0.151978
hsa-miR-6874-5p	0.24	0	0	0	0	0.22	0.1	0	0	0.12	0.09	0	0.1	0	0	0	0	0	0	0	0.068	0.019	-1.8395	0.152233
hsa-miR-3614-3p	0.48	0.19	0	0	0.52	0	0.78	0.5	0.47	0.23	0.36	0.1	0	0.39	0.33	0	0.37	0.09	0.21	0	0.317	0.185	-0.777	0.152609
hsa-miR-7848-3p	2.15	0.65	0.45	0.51	1.03	0.98	1.26	2.12	0	1.39	3.66	1.01	0.6	1.27	1.64	2.08	1.12	0	1.8	4.83	1.054	1.801	0.7729	0.152613
hsa-miR-361-3p	418.23	331.73	287.31	194.15	499.49	553.86	366.49	591.23	146.07	583.2	1077.26	692.05	545.59	485.46	591.75	547.34	375.61	189.35	498.95	626.97	397.176	563.033	0.5034	0.152822
hsa-miR-548am-3p	7.27	5.33	2.96	2.88	5.68	5.2	7.17	8.11	2.35	5.78	7.42	9.05	6.73	4.49	7.79	5.05	5.88	2.3	5.51	21.56	5.273	7.578	0.5232	0.152898
hsa-miR-545-3p	0	0	0	0.1	0	0	0	0	0	0	0.09	0	0	0.1	0.22	0	0.09	0.18	0	0	0.01	0.068	2.7655	0.154646
hsa-miR-320e	0.12	0.09	0.18	0.21	0	0.22	0.39	0.12	0	0.12	0.27	0.2	0.6	0.29	0.33	0.2	0.37	0	0.11	0.56	0.145	0.293	1.0148	0.156754
hsa-miR-495-3p	16.22	7.95	12.02	6.28	20.39	5.2	8.72	18.59	12.98	21.28	27.71	11.16	2.31	2.25	5.48	18.73	20.54	7.09	2.44	1.86	12.963	9.957	-0.3806	0.157335
hsa-miR-1298-5p	0.12	0.19	0	0.31	0.17	0.22	0.29	0.12	0	0	0.36	0.6	0.2	0	0.33	0.3	0.28	0.27	0.21	0.19	0.142	0.274	0.9483	0.159022
hsa-miR-3656	3.58	2.99	10.04	9.57	6.28	13.87	8.33	12.35	2.35	6.59	6.7	4.82	23.3	16.2	19.74	14.67	8.4	12.06	5.09	4.83	7.595	11.581	0.6086	0.1592
hsa-miR-199a-5p	416.56	206.84	96.04	107.37	838.31	524.93	595.61	665.23	98.39	560.07	3318.47	644.41	333.4	387.25	937.52	474	639.86	110.99	361.04	231.91	410.935	743.885	0.8562	0.159783
hsa-miR-6850-5p	0.24	0.56	0.18	0.82	0.34	0.22	0.39	0.37	0	0	0	0	0	0.1	0.11	0.4	0.09	0	0.21	0.74	0.312	0.165	-0.9191	0.162585
hsa-miR-6810-5p	0	0.09	0	0.1	0.09	0.11	0.1	0.12	0	0	0.09	0.2	0	0.2	0	0.2	0.19	0.18	0	0.37	0.061	0.143	1.2291	0.162777
hsa-miR-3960	0.48	0.37	1.43	0.93	0.86	1.08	1.26	0.5	0.19	0.23	0.63	0.3	2.81	2.93	2.52	1.98	0.56	0.89	0.32	0.19	0.733	1.313	0.841	0.162837
hsa-miR-7151-5p	0.12	0	0	0	0.17	0	0.39	0.25	0.19	0.12	0.45	1.01	0	0.1	0.22	0.4	0.09	0	0.32	0.19	0.124	0.278	1.1647	0.164815
hsa-miR-4326	49.73	46.12	48.69	32.43	54.1	51.36	61.52	21.21	7.24	42.56	55.24	73.37	95.9	67.36	33.34	64.12	21.66	10.46	66.99	117.63	41.496	60.607	0.5465	0.16625
hsa-miR-5695	2.5	1.59	0.54	0.72	1.55	0.11	0.78	0.5	5.17	0.35	0.27	1.81	0.1	0.29	0.22	0.3	0.56	3.19	0.32	0	1.381	0.706	-0.968	0.16701
hsa-miR-4647	0.12	0.28	0.36	0.1	0	0	0.19	0.37	0	0.23	0.09	0.1	0.2	0.1	0.11	0.4	0.37	0	0.32	2.04	0.165	0.373	1.1767	0.167638
hsa-miR-7851-3p	0	0	0.27	0	0.26	0.33	0.19	0.25	0.09	0.12	0.45	0.3	0.4	0.59	0.66	0.2	0.19	0.09	0.21	0	0.151	0.309	1.0331	0.169377
hsa-miR-3611	0	0	0	0	0	0	0	0	0.28	0.12	0	0.1	0	0	0	0.1	0	1.77	0	0	0.04	0.197	2.3001	0.169547
hsa-miR-1-3p	17.06	16.84	11.57	15.24	6.45	388.64	7.56	11.48	216.81	10.64	18.95	7.14	145.51	24.7	54.94	94.25	13.62	60.99	8.06	12.82	70.229	44.098	-0.6714	0.170082
hsa-miR-1276	0.36	0.28	0.18	0	0.26	0	0.1	0	0	0.12	0.09	0.3	0.6	0.59	0.11	0.2	0.19	0	0.11	0.37	0.13	0.256	0.9776	0.173372
hsa-miR-5090	0.6	0.75	0.9	1.03	0.69	0.98	1.07	2.12	0.47	1.04	0.98	0.6	0.9	0.78	0.99	1.09	1.12	0.44	0.53	0	0.965	0.743	-0.3772	0.174576
hsa-miR-758-3p	3.82	1.5	4.39	1.44	10.06	5.31	3.2	7.86	2.35	11.33	15.02	3.32	2.41	1.46	3.18	5.45	6.25	1.06	1.91	1.3	5.126	4.136	-0.3096	0.175326
hsa-miR-6840-5p	0.12	0.19	0.27	0.41	1.72	0	0.19	0.62	0	0.23	0.09	0.1	0.6	0.2	0.11	0	0	0.27	0.32	0	0.375	0.169	-1.1499	0.175816
hsa-miR-6884-5p	1.07	2.43	1.17	1.96	1.12	1.63	1.07	1.62	0.09	0.69	0.27	1.01	0.6	1.46	1.64	1.29	0.65	0.27	0.74	1.11	1.285	0.904	-0.5074	0.176025
hsa-miR-6817-3p	0.12	0.19	0.54	0.1	0.34	0.43	0.39	0.37	0	0.23	0.54	0.4	0.9	0.49	0.44	0.79	0.56	0.27	0.32	0	0.271	0.471	0.7974	0.176977
hsa-miR-642b-5p	0.36	0.09	0.18	0.21	0.17	0.22	0	0.25	0	0.69	1.43	0	0.5	0.59	0.44	0.3	0.47	0	0.85	0	0.217	0.458	1.0777	0.177272
hsa-miR-455-5p	0.24	0.19	0.27	0.21	0	1.52	0	0	0	0.23	0.09	0	0.1	0.2	0.11	0.4	0	0.09	0.32	0	0.266	0.131	-1.0219	0.17751
hsa-miR-769-5p	30.41	21.61	16.41	8.85	46.02	44.64	25.48	35.19	6.87	29.95	128.36	25.73	39.87	30.55	45.62	32.6	34.82	16.22	30.74	20.07	26.543	40.458	0.6081	0.177545
hsa-miR-503-5p	48.3	94.3	50.31	33.35	50.15	56.23	57.74	51.04	39.5	37.24	39.33	20.3	35.05	60.43	61.96	61.74	40.04	40.96	36.89	34.75	51.816	43.145	-0.2642	0.177906
hsa-miR-3127-5p	0.36	0.84	0.63	1.03	0.17	0.54	0.39	1	0.09	0.58	0.27	0.4	0.6	0.39	0.44	0	0.37	0	0.32	0.93	0.563	0.372	-0.5978	0.178159
hsa-miR-337-5p	0	0	0.09	0	0.26	0.33	0.1	0.25	0.38	0.81	0.36	0.2	0	0	0	0.4	0.28	0	0	0	0.222	0.124	-0.8402	0.181075
hsa-miR-183-3p	2.86	5.33	3.59	3.19	8.43	3.68	6.98	7.74	1.03	11.1	4.65	4.82	3.72	7.91	2.3	2.28	5.41	3.46	2.23	0.93	5.393	3.771	-0.5161	0.181613
hsa-miR-3120-3p	7.16	3.37	1.7	1.44	7.74	4.44	8.23	6.86	1.41	2.54	13.59	6.93	4.72	5.47	13.82	10.8	4.57	1.33	4.13	3.72	4.489	6.908	0.6219	0.182572
hsa-miR-6716-3p	0.36	0.37	0.27	0	0.52	0.11	0	0.12	0.19	0.12	0.18	0.5	0.1	0.1	0.33	0.4	0.19	0	0.21	2.42	0.206	0.443	1.1047	0.182587
hsa-miR-6134	0.24	0	0.09	0.31	0	0.22	0	0.5	0.28	0.23	0.09	0.1	0.5	0.59	0.55	0.69	0.28	0.44	0.42	0	0.187	0.366	0.9688	0.183803
hsa-miR-1226-5p	0	0	0	0	0	0	0	0	0	0	0.27	0	0.2	0	0	0	0	0	0	0	0	0.047	2.2327	0.184099
hsa-miR-3918	0	0.09	0.45	0.1	0.52	0.43	0.1	0.12	0	0.12	0.09	0.6	0.5	0.78	0.55	0.3	0.09	0.18	0.21	0.19	0.193	0.349	0.8546	0.184597
hsa-miR-378i	57.84	52.95	37.21	28.31	111.65	86.57	77.99	79.74	21.45	67.88	249.2	85.53	81.84	50.96	62.84	53.51	77.29	51.06	86.29	92.54	62.159	89.106	0.5196	0.186065
hsa-miR-1255b-5p	17.77	37.14	39.01	35.93	23.05	19.18	21.99	20.59	19.66	17.23	11.17	31.56	16.97	21.48	18.53	21.21	19.51	14.01	22.68	21.56	25.155	19.868	-0.3404	0.187669
hsa-miR-4732-5p	39.83	57.25	66.72	62.59	38.02	52.76	38.75	55.65	29.35	47.07	27.8	24.62	56.44	73.8	74.57	30.92	36.31	22.96	43.88	13.75	48.799	40.505	-0.2688	0.189297
hsa-miR-3191-3p	0.24	0.37	0.36	0.21	0.34	0.65	0.78	0.62	0.09	0.35	0.89	0.6	0.5	0.39	0.44	1.09	0.09	0	0.42	2.6	0.401	0.702	0.8079	0.192558
hsa-let-7f-2-3p	0.6	0.65	0.36	0.31	1.46	0.33	0.1	0.62	0.75	0.58	3.93	0.1	0.4	0.1	0.22	0.2	1.21	4.52	0.32	0.19	0.576	1.119	0.9581	0.193008
hsa-miR-675-5p	0	0	0	0	0	0	0	0	0	0	0.36	0.1	0	0	0	0	0	0	0	0	0	0.046	2.2016	0.196036
hsa-miR-874-5p	0	0.09	0	0.31	0.26	0.43	0.19	0.12	0.19	0.12	0.18	0.2	0.2	0.1	0.11	0	0	0.18	0	0	0.171	0.097	-0.8179	0.196096
hsa-miR-1185-5p	0	0	0	0	0	0	0	0	0	0	0	0	0	0	0	0	0.18	0.18	0	0	0	0.036	1.848	0.199503
hsa-miR-423-5p	3089.44	3505.49	4054.49	3928.08	3837.26	6316.61	3685.23	4535.16	920.18	4481.14	3297.65	4076.11	6528.9	7933.09	5911.47	6379.85	3425.76	1157.22	5652.25	9212.2	3835.31	5357.45	0.4822	0.199549
hsa-miR-582-5p	1.79	0.56	0.27	0.1	1.2	1.63	2.23	1.25	1.79	2.78	10.46	0.4	0.8	0.68	1.64	0.5	2.15	7.54	2.23	0	1.36	2.64	0.9569	0.199926
hsa-miR-1307-3p	542.26	350.72	377.26	385.62	705.93	1032.74	859.98	799.87	72.9	728.8	1036.41	568.03	1110.26	685.67	866.79	1410.11	506.48	99.91	692.09	1453.14	585.608	842.889	0.5254	0.200079
hsa-miR-202-5p	0	0.19	0.09	0	0.43	0	0.19	0	0.47	0	0.09	0.1	0	0.49	0	0	0.09	2.66	0.11	0	0.137	0.354	1.3696	0.200717
hsa-miR-5585-3p	0.12	0.19	0	0	0.26	0.76	0	0.12	0.28	0	0.18	0.1	0.1	0.29	0	0.1	0.19	0	0	0	0.173	0.096	-0.8497	0.200915
hsa-miR-548av-3p	110.92	89.9	49.95	48.16	85.06	80.5	77.21	83.86	28.78	75.06	86.18	116.09	74.23	74.89	94.74	64.8	72.25	38.56	87.14	267.21	72.94	97.609	0.4203	0.203776
hsa-miR-526a	0.36	0.27	0	0	0	0	0.3	0	0	0	0.27	0	0	0	0	0	0	0	0	0	0.093	0.027	-1.7843	0.203807
hsa-miR-548ah-3p	11.22	10.2	5.65	4.74	9.54	10.94	8.52	9.36	2.73	6.25	9.66	14.38	12.16	8.4	12.17	7.82	8.49	3.02	7.64	23.78	7.915	10.752	0.4419	0.204026
hsa-miR-518d-5p	0.36	0.27	0	0	0	0	0.3	0	0	0	0.27	0	0	0	0	0	0	0	0	0	0.093	0.027	-1.7843	0.204059
hsa-miR-605-5p	0.24	0.19	0.54	0.1	0.09	0.22	0.58	0.87	0.19	0.35	0.54	0.2	0.2	0.1	0.22	0.1	0.56	0.09	0.11	0.19	0.337	0.231	-0.5449	0.204305
hsa-miR-520c-5p	0.36	0.27	0	0	0	0	0.3	0	0	0	0.27	0	0	0	0	0	0	0	0	0	0.093	0.027	-1.7843	0.20432
hsa-miR-4508	34.46	28.72	80.44	70.21	71.05	144.97	56.19	58.27	8	33.19	56.49	12.16	278.37	134.32	153.75	115.45	78.31	56.2	36.25	18.58	58.55	93.988	0.6828	0.205135
hsa-miR-212-3p	0.36	0	0	0	0.17	0.33	0.19	0	0	0.35	0.8	0	0.2	0.2	0.66	0.1	0.28	0.27	0.21	0	0.14	0.272	0.9582	0.205193
hsa-miR-6511b-3p	6.2	6.55	11.3	7.21	4.99	11.27	9.11	10.11	3.1	10.99	7.42	3.22	11.65	10.74	10.64	4.36	6.81	1.68	8.37	0.93	8.083	6.582	-0.2964	0.205935
hsa-miR-19b-1-5p	0.12	0	0	0	0.09	0	0.1	0.12	0.09	0.12	0.36	0.2	0	0	0.22	0.1	0	0.18	0.21	0.19	0.064	0.146	1.1898	0.20751
hsa-miR-151a-3p	7582.87	3680.15	3081.8	4310.51	3030.6	1724.2	3399.74	2292.79	1615	1765.79	3356.73	4547.46	1422.57	2389.22	2829.79	8622.61	2517.91	910.15	1796.31	20903.1	3248.34	4929.59	0.6018	0.208418
hsa-miR-6824-3p	0	0	0.18	0	0.09	0	0.19	0	0.09	0.12	0	0	0	0	0.11	0	0	0	0.11	0	0.067	0.022	-1.6067	0.208436
hsa-miR-3140-3p	3.1	3.37	4.12	2.47	2.67	3.03	2.13	2.37	1.88	2.31	2.59	2.51	2.11	2.05	2.3	1.88	3.36	1.77	2.23	2.04	2.745	2.284	-0.2652	0.208539
hsa-miR-301b-3p	0.72	0.37	0.27	0.21	0.09	0.22	0.1	0.37	0	0.12	0.09	0.1	0.2	0.1	0.11	0.3	0.09	0.18	0.21	0	0.247	0.138	-0.8398	0.209538
hsa-miR-451a	143973	175738	118551	126228	247431	48002.9	152433	101248	520329	141274	151534	168938	22982.2	54850.1	65827.4	111702	196692	374942	89276.7	58798.3	177521	129554	-0.4544	0.210101
hsa-miR-1908-5p	7.99	5.8	5.2	7.1	12.73	4.98	6.49	16.35	1.98	4.74	20.47	9.65	9.84	9.08	10.64	10.6	5.69	1.42	14.31	15.61	7.336	10.731	0.5487	0.210141
hsa-miR-548o-3p	98.98	78.96	44.12	42.92	75.18	69.23	67.82	74.12	26.14	68	76.34	100.7	60.26	66	82.35	56.68	63.66	35.28	78.86	240.46	64.547	86.059	0.415	0.211324
hsa-miR-3162-5p	0	0	0.09	0	0	0	0	0	0	0.35	0	0	0	0	0	0	0	0	0	0	0.044	0	-2.1375	0.211538
hsa-miR-5680	0	0.09	0	0	0	0	0	0	0.09	0	0.27	0.1	0	0	0	0.1	0	0.09	0	0.19	0.018	0.075	2.0589	0.211603
hsa-miR-548b-5p	0.83	0.09	1.08	0.62	0.17	0.54	0.58	0.62	3.76	0.23	0.36	0.1	0.5	1.07	1.86	1.19	0.28	1.06	0.32	0	0.852	0.674	-0.3381	0.211704
hsa-miR-4744	0	0.09	0	0.21	0.09	0	0	0.12	0.56	0	0	0	0	0	0	0	0.09	0.09	0.11	0.19	0.107	0.048	-1.1565	0.211851
hsa-miR-6837-5p	0.24	0.09	0.09	0.21	0.34	0	0.29	0.25	0.09	0.35	0.54	0	0.3	0.39	0.11	0.79	0.47	0.27	0.21	0.37	0.195	0.345	0.8231	0.212049
hsa-miR-30d-3p	5.72	4.49	2.87	2.99	7.83	5.63	6.78	4.87	2.54	4.86	13.94	5.63	3.31	5.17	6.8	12.68	5.41	7.45	5.62	2.79	4.858	6.88	0.502	0.213133
hsa-miR-3199	1.19	1.22	1.08	0.31	0.77	0.33	0.48	0.62	0.94	0.46	0.45	0.5	0.6	0.29	0.55	0.1	0.65	0.8	0.74	0.56	0.74	0.524	-0.498	0.213652
hsa-miR-4446-3p	8.23	5.99	4.84	3.29	4.82	6.93	13.37	15.97	1.88	9.95	35.57	5.83	6.83	16.01	19.3	13.58	9.15	1.24	4.88	8.73	7.527	12.112	0.6863	0.213695
hsa-miR-1909-3p	0	0	0	0.1	0.09	0.22	0	0.12	0	0	0.27	0	0.1	0.1	0.33	0.2	0	0	0.42	0	0.053	0.142	1.4218	0.21452
hsa-miR-3177-3p	3.1	2.25	2.78	2.16	3.53	3.36	1.45	2.62	0.38	2.66	4.2	4.12	2.51	3.42	3.73	6.34	2.71	0.89	2.12	4.46	2.429	3.45	0.5062	0.214657
hsa-miR-3188	0.83	0.65	0.63	0.31	0.86	0.87	1.16	1.25	0.28	0.81	1.7	0.8	2.11	2.15	1.75	1.49	0.28	0.27	0.32	0.93	0.765	1.18	0.6253	0.214743
hsa-miR-6861-3p	0.12	0.28	0.45	0	0.6	0.43	0.1	0.12	0	0.35	1.16	0.1	0.8	0.68	0.55	0.5	0.09	0.09	0.74	0	0.245	0.471	0.9429	0.215624
hsa-miR-3615	695.86	877.31	862.12	993.4	1371.78	1335.35	1755.14	1308.86	221.89	1087.53	812.32	1271.23	1790.31	1639.51	1855.63	1598.41	1238.09	229.07	1766.63	2311.83	1050.92	1451.3	0.4657	0.215684
hsa-miR-6886-3p	0	0	0	0	0	0	0	0.25	0	0	0.09	0	0.2	0.1	0.22	0.1	0	0	0.11	0	0.025	0.082	1.7137	0.21609
hsa-miR-320b	234.22	250.99	277.99	463.86	273.44	243.13	279.4	381.96	111.74	362.89	181.54	236.68	233.98	379.83	312	223.67	204.33	94.85	306.88	206.26	287.962	238.002	-0.2749	0.216668
hsa-miR-3163	1.91	2.34	2.78	2.99	1.72	1.19	1.36	1.75	0.94	1.16	0.98	2.41	1.51	1.56	1.86	1.29	1.31	0.8	1.38	1.11	1.814	1.421	-0.3523	0.217584
hsa-miR-548s	0.72	0.09	0.09	0	0.52	0.33	0.1	0.37	0	0.46	0.89	0.1	0.4	0.49	0.77	0.3	0.56	0.27	0.42	0.19	0.268	0.439	0.712	0.219252
hsa-miR-4757-3p	0.12	0.09	0.09	0.1	0.52	0.22	0.29	0.12	0	0.23	0.09	0.1	0.1	0.1	0.11	0.2	0.09	0	0.21	0	0.178	0.1	-0.8319	0.21934
hsa-miR-19a-3p	29.1	17.49	11.84	21.93	8.95	3.9	12.11	8.36	186.33	5.44	9.65	7.94	2.81	7.22	8.12	9.12	6.07	122.96	7.84	1.3	30.545	18.303	-0.7389	0.219879
hsa-miR-34b-3p	0	0.09	0	0	0	0	0.1	0	0	0	0.45	0	0.1	0	0	0.1	0.09	0.09	0	0	0.019	0.083	2.1271	0.220356
hsa-miR-33a-3p	0	0	0.09	0.1	0.09	0.11	0.1	0	0.19	0.12	0.36	0	0.2	0	0.11	0.1	0.28	0.53	0.11	0.19	0.08	0.188	1.2327	0.221758
hsa-miR-6779-5p	0	0	0	0	0	0.11	0	0	0	0	0.18	0	0.1	0.1	0.11	0.1	0	0	0	0	0.011	0.059	2.4232	0.222837
hsa-miR-98-3p	0.12	0	0	0	0.17	0	0	0	0.09	0	0.63	0	0	0	0	0	0.19	0.53	0	0	0.038	0.135	1.8289	0.224022
hsa-miR-9-5p	9.42	6.74	5.38	6.79	10.24	6.07	6.68	9.73	5.46	6.94	52.92	11.66	3.11	6.15	9.1	15.76	10.17	4.61	6.47	5.02	7.345	12.497	0.7667	0.226447
hsa-miR-339-3p	81.81	64.83	65.01	48.07	88.85	131.53	98.33	81.98	12.6	75.17	193.61	84.52	137.88	106.11	114.93	133.39	82.98	28.1	92.12	70.24	74.818	104.388	0.4805	0.227083
hsa-miR-1273h-5p	5.96	2.81	2.51	2.68	2.15	2.82	3.49	3.99	0.75	4.51	10.9	2.51	3.01	4.78	6.8	8.23	3.27	0.62	3.39	4.65	3.167	4.816	0.6047	0.227547
hsa-miR-6875-5p	0	0.09	0	0	0	0	0.1	0	0	0	0	0	0	0.1	0	0.1	0	0.09	0.11	0.37	0.019	0.077	2.0189	0.228583
hsa-miR-206	0	0	0	0.1	0	34.35	0	0.12	0	0.23	0.27	0	8.74	0.1	0.22	0.1	0	0	0	0.56	3.48	0.999	-1.8005	0.229209
hsa-miR-323a-5p	0.12	0.09	0.36	0.1	0.34	0	0	0.25	0	0.23	0.18	0	0	0	0	0.2	0.09	0	0	0.37	0.149	0.084	-0.8269	0.229281
hsa-miR-6724-5p	0.36	0.09	0.09	0	0	0.11	0.19	0.25	0.09	0.12	0.8	0	0.7	0.39	0.44	0	0	0	0.32	0.19	0.13	0.284	1.1274	0.231182
hsa-miR-191-3p	9.3	4.68	3.14	4.63	6.02	5.85	8.23	10.48	1.5	10.52	26.01	6.73	7.43	5.66	8.55	11.3	10.55	1.51	11.02	7.06	6.435	9.582	0.5744	0.231769
hsa-miR-4470	0	0.09	0.18	0.1	0	0.22	0.39	0.12	0.09	0.12	0.36	0.3	0.1	0.49	0	0.79	0.09	0.09	0.11	0.19	0.131	0.252	0.9439	0.232727
hsa-miR-212-5p	3.82	1.4	1.43	1.44	2.58	2.06	2.13	2.12	0.19	3.12	4.56	2.31	1.71	2.64	2.52	2.38	2.05	0.8	2.76	6.69	2.029	2.842	0.4861	0.233378
hsa-miR-548az-5p	1.91	1.4	2.78	1.13	1.38	1.63	3.2	2	1.6	1.5	1.25	0.9	2.11	1.66	1.75	2.08	2.05	3.72	2.23	8.73	1.853	2.648	0.515	0.233821
hsa-miR-326	8.23	6.83	11.48	5.97	20.3	31.85	31.68	28.58	5.27	25.67	78.3	12.06	32.24	27.92	50.99	26.86	22.5	7.27	20.46	3.9	17.586	28.25	0.6838	0.234151
hsa-miR-320a	4117.42	3843.96	4452.55	6565.88	2391.93	2592.37	3015.13	3863.45	1869.9	3822.08	1915.77	3867.47	2807.58	4541.71	4200.04	3058.76	2220.89	1156.15	3676.48	2845.52	3653.47	3029.04	-0.2704	0.23453
hsa-miR-506-3p	0.36	0.09	0.09	0	0	0.22	0.1	0.25	0	0	0.27	0.1	0.2	0.39	0.11	0.2	0.19	0.09	0.21	0.19	0.111	0.195	0.8129	0.234998
hsa-miR-4437	0	0.09	0	0.1	0	0.22	0	0	0	0.12	0.09	0	0	0	0	0.1	0	0	0	0	0.053	0.019	-1.48	0.235068
hsa-miR-10b-5p	6.2	3.46	3.14	6.9	0.95	24.05	0.87	1.87	3.1	0.69	6.08	5.53	2.81	6.05	1.75	7.83	1.59	0.8	2.01	2.23	5.123	3.668	-0.482	0.235207
hsa-miR-4477b	0	0	0	0	0	0	0	0.12	0	0	0.18	0.1	0	0.1	0	0.2	0	0	0	0	0.012	0.058	2.273	0.235324
hsa-miR-3938	0	0	0	0	0	0	0	0.12	0	0	0.18	0	0	0	0	0.1	0.19	0	0.11	0	0.012	0.058	2.273	0.235769
hsa-miR-129-1-3p	0.83	0.94	1.08	0.51	0.43	0.43	1.84	0.87	0.38	0.46	0.54	0.4	1.21	0.29	0.22	0.2	0.37	0.53	0.85	0.93	0.777	0.554	-0.488	0.235939
hsa-miR-3681-5p	0.12	0	0	0	0	0	0	0	0	0	0	0.1	0	0	0	0	0	0.09	0.11	0.19	0.012	0.049	2.0297	0.23665
hsa-miR-876-3p	0	0	0	0	0	0.11	0	0.12	0.09	0	0.54	0.1	0	0.1	0	0.1	0.19	0.09	0	0	0.032	0.112	1.8074	0.236696
hsa-miR-941	303.39	543.52	181.95	323.75	302.78	772.39	250.33	677.7	86.63	586.09	800.79	511.45	515.36	766.5	983.03	442.88	157.75	64.8	609.51	1027.42	402.853	587.949	0.5454	0.237037
hsa-miR-4796-3p	0.12	0.09	0.09	0.31	0	0	0	0.12	0.28	0	0.27	0	0.1	0	0.11	0	0	0.09	0	0	0.101	0.057	-0.8253	0.237285
hsa-miR-6779-3p	0	0.09	0	0	0.09	0	0.19	0	0	0.35	0.09	0	0.1	0	0	0	0	0	0.11	0	0.072	0.03	-1.263	0.23752
hsa-miR-4510	0.72	1.22	0.9	0.41	3.35	10.51	3.68	4.87	0.28	1.73	3.31	0.7	18.48	1.66	1.32	0.79	6.63	3.72	5.19	1.49	2.767	4.329	0.6457	0.238799
hsa-miR-5187-5p	0.12	0.56	0.54	0.41	0.17	0.54	0.39	0.62	0.09	0.69	0.63	0.3	0	0.49	0.44	0.89	0.09	0.09	0.11	0	0.413	0.304	-0.4421	0.239109
hsa-miR-421	38.64	31.62	26.72	23.57	15.14	15.71	25.67	20.09	50.42	21.39	31.82	18.99	11.85	14.74	21.71	22.79	31.74	44.06	19.82	5.2	26.897	22.272	-0.2722	0.239442
hsa-miR-6852-3p	0.36	0.28	0.45	0.62	1.03	0.76	0.48	0.75	0	0.35	1.88	0.3	1	0.29	1.1	1.88	1.03	0.18	0.11	0.74	0.508	0.851	0.7443	0.240408
hsa-miR-425-5p	1287.25	1313.72	743.48	894.06	2640.69	1419.86	2189.44	1301	942.66	1789.96	2128.24	1541.78	1152.54	980.58	1261.25	1013.91	1782.56	782.5	1240.76	515.66	1452.21	1239.98	-0.2279	0.240492
hsa-miR-23a-5p	1.55	1.22	0.99	0.62	1.38	1.73	0.78	2.37	0.75	2.2	4.92	1.11	0.7	2.64	1.75	3.47	1.68	0.44	2.44	1.67	1.359	2.082	0.6154	0.240926
hsa-miR-6509-5p	0	0	0.09	0	0	0.33	0.1	0	0	0.12	0.27	0.2	0.4	0.2	0.11	0	0	0.09	0.11	0	0.064	0.138	1.1085	0.241713
hsa-miR-338-5p	22.3	16.28	9.86	3.29	10.67	20.26	16.86	37.19	1.98	41.98	106.9	3.22	32.34	21.77	36.41	27.35	28.28	5.85	45.05	4.09	18.067	31.126	0.7848	0.24337
hsa-miR-196a-5p	4.89	1.03	0.72	1.24	0.34	1.73	0.87	1.37	5.17	1.27	3.4	0.2	0.9	3.51	1.1	0.5	1.68	1.24	1.91	1.11	1.863	1.555	-0.2607	0.244839
hsa-miR-3909	22.18	17.96	23.49	15.44	42.84	42.25	45.82	40.06	3.67	37.35	38.61	41.61	68.69	38.46	45.84	44.79	29.5	7.62	56.08	26.39	29.106	39.759	0.45	0.245098
hsa-miR-3166	0	0.19	0	0	0.09	0	0	0	0	0.12	0	0.4	0	0.2	0.33	0.2	0	0	0	0	0.04	0.113	1.4983	0.247482
hsa-miR-4433a-5p	1.43	1.4	3.32	1.75	0.26	2.82	3.1	1.5	1.22	1.62	2.06	1.31	2.31	1.07	3.07	0.5	0.93	0.62	2.76	0.19	1.842	1.482	-0.3137	0.247776
hsa-miR-548ae-3p	0.48	0.38	0.18	0	0	0	0	0.24	0.56	0	0.54	0.2	0.2	0	0.22	0	0.18	2.3	0.42	0	0.184	0.406	1.1418	0.248117
hsa-miR-4727-3p	0	0.09	0.09	0	0.09	0.11	0.1	0	0	0	0.09	0	0	0.2	0.11	0.1	0.19	0	0	0.74	0.048	0.143	1.5749	0.249476
hsa-miR-4467	6.68	3.18	4.57	4.84	1.89	4.55	3.49	0.5	0	3.12	0.18	1.91	5.82	0	0.22	0.4	2.8	0.89	5.51	38.65	3.282	5.638	0.7806	0.24987
hsa-miR-6742-5p	0	0	0	0	0	0	0	0	0	0	0.09	0	0.1	0	0	0	0	0	0.11	0	0	0.03	1.585	0.250266
hsa-miR-4679	0	0	0	0	0	0	0	0	0	0	0	0	0	0.1	0	0.1	0.09	0	0	0	0	0.029	1.5361	0.250266
hsa-miR-6765-3p	0	0	0	0	0	0	0	0	0	0	0	0	0.1	0.1	0.11	0	0	0	0	0	0	0.031	1.6323	0.250266
hsa-miR-4419b	0	0	0	0	0	0	0	0	0	0	0.09	0	0.1	0	0	0	0	0	0.11	0	0	0.03	1.585	0.250266
hsa-miR-663b	0	0	0	0	0	0	0	0	0	0	0.09	0.1	0.1	0	0	0	0	0	0	0	0	0.029	1.5361	0.250266
hsa-miR-4670-3p	0	0	0	0	0.09	0	0.1	0.12	0	0	0	0	0	0	0	0	0	0	0	0	0.031	0	-1.6323	0.250266
hsa-miR-549a	0	0	0	0.1	0	0	0	0	0	0	0.18	0.2	0.1	0	0.11	0	0	0	0	0	0.01	0.059	2.5607	0.250728
hsa-miR-6876-3p	0	0.09	0	0	0	0	0.1	0.12	0	0	0	0	0	0	0	0	0	0	0	0	0.031	0	-1.6323	0.251844
hsa-miR-548q	1.31	2.53	2.51	2.37	1.03	2.49	3.78	3.12	1.13	2.2	2.59	1.51	2.81	2.25	1.64	0.79	1.77	0.71	2.76	1.86	2.247	1.869	-0.2657	0.251945
hsa-miR-3158-3p	237.08	302.63	235.75	313.25	362.9	366.75	166.73	153.36	69.32	156.24	100.38	355.37	343.14	357.09	297.08	456.16	165.12	59.48	231.4	935.06	236.401	330.028	0.4814	0.252198
hsa-miR-450a-5p	60.22	46.3	30.84	18.52	68.38	62.3	49.5	29.7	33.68	27.52	93.77	28.34	47	82.1	102.86	188.49	43.59	51.42	33.5	4.08	42.696	67.515	0.6611	0.252254
hsa-miR-4680-5p	0	0	0	0	0	0	0	0	0	0	0	0	0	0	0.11	0	0	0.09	0.11	0	0	0.031	1.6323	0.252931
hsa-miR-3651	0.12	0.09	0.09	0	0.09	0	0	0	0	0	0.27	0	0.3	0.39	0.11	0.1	0	0	0	0	0.039	0.117	1.585	0.255573
hsa-miR-3157-5p	0.95	1.87	1.7	1.13	2.84	3.36	1.16	2	0.47	2.43	2.95	1.91	3.92	3.42	2.74	2.28	3.17	1.42	2.76	0.56	1.791	2.513	0.4886	0.25637
hsa-miR-191-5p	16881.7	16397.3	10846	8751.15	12578.6	12670	12654.8	15298.9	10550.4	18149.3	21576.1	11631	11857	9866.62	12702.1	6131.89	16078.3	12412.3	10382.5	1410.59	13477.8	11404.8	-0.2409	0.256635
hsa-miR-139-3p	6.08	3.65	7.26	4.84	4.9	5.2	10.46	11.48	1.22	9.83	15.37	1.21	3.41	10.64	8.22	11.59	8.03	0.89	7.63	30.48	6.492	9.747	0.5863	0.257326
hsa-miR-548a-3p	0.96	0.18	0.54	0	1.2	0.22	0.2	0.5	0.94	1.38	1.44	0	0.2	0.4	0.88	1.18	0.56	5.14	0.64	0	0.612	1.044	0.7705	0.258696
hsa-miR-4783-3p	0	0	0	0	0.09	0	0	0	0.09	0.12	0	0	0	0	0	0	0	0	0	0	0.03	0	-1.585	0.25898
hsa-miR-432-5p	9.42	4.49	15.07	6.38	9.2	14.08	4.84	21.21	9.03	21.63	23.42	6.23	9.24	9.76	8.99	15.86	16.33	2.66	3.07	7.25	11.535	10.281	-0.166	0.261217
hsa-miR-548i	0.83	0.47	0.36	0.41	0.77	0.54	0.58	0.62	0.38	0.58	1.43	1.01	0.4	0.49	0.88	0.69	1.21	0.89	0.95	0.19	0.554	0.814	0.5551	0.261497
hsa-miR-342-3p	283.95	180.08	227.68	89.97	178.74	148.11	232.41	325.31	132.91	288.19	819.21	72.36	92.49	112.65	183.91	88.89	224.39	128.54	181.69	24.53	208.735	192.866	-0.1141	0.261962
hsa-miR-3194-3p	0.36	0.75	0.18	0.51	1.72	1.63	2.42	0.62	0.09	0.93	2.06	0.8	2.01	2.25	1.32	1.49	2.89	0.18	0.85	0.37	0.921	1.422	0.6266	0.263065
hsa-miR-181a-3p	25.64	13.66	4.66	5.25	22.71	9.32	12.88	16.22	3.01	11.33	87.33	12.66	10.85	10.15	14.91	22.3	15.03	10.02	9.22	5.95	12.468	19.842	0.6703	0.264444
hsa-miR-6815-3p	0	0.19	0.18	0.1	0	0	0.19	0.12	0	0	0.18	0	0.1	0	0.11	0	0	0	0	0	0.078	0.039	-1	0.265272
hsa-miR-214-3p	0.36	0	0	0.51	0.17	1.19	0	0	0	0	0.54	0	0	0	0	0.2	0.19	0	0.11	0.19	0.223	0.123	-0.8584	0.265581
hsa-miR-181a-2-3p	131.78	89.53	56.14	41.59	109.58	60.56	55.22	65.64	13.54	54.82	293.09	79.19	55.63	58.86	67.55	104.75	113.41	28.81	43.25	139	67.84	98.354	0.5358	0.265721
hsa-miR-494-3p	11.81	4.58	6.1	2.37	13.33	7.26	3.68	20.96	26.43	27.29	38.7	5.33	3.11	1.27	6.03	3.77	21.47	17.64	2.01	0.56	12.381	9.989	-0.3097	0.266211
hsa-miR-615-3p	0.83	0.28	0.72	0	0.26	1.3	1.07	2.12	0	0.93	3.49	0.4	1.31	0.2	0.99	3.96	0.56	0	0.95	1.49	0.751	1.335	0.83	0.266356
hsa-miR-4665-5p	1.55	0.56	0.45	1.13	0.6	1.08	0.97	0.87	0.09	1.16	2.23	1.11	0.5	1.17	1.86	1.88	1.21	0	1.17	1.67	0.846	1.28	0.5974	0.268959
hsa-miR-24-2-5p	36.73	21.98	10.13	9.68	31.14	15.17	17.53	16.72	27.37	20.01	56.67	22.01	9.44	10.25	12.61	18.83	16.52	14.1	19.61	7.8	20.646	18.784	-0.1364	0.269224
hsa-miR-3175	0	0	0.45	0	0.52	0.54	0.1	0.5	0.19	0.46	0.36	0.2	0.1	0	0.44	0.1	0.19	0	0.32	0.19	0.276	0.19	-0.5387	0.270677
hsa-miR-320c	26.24	30.68	37.75	54.77	31.48	29.79	34	44.17	10.06	36.31	23.95	28.24	29.52	38.36	40.58	28.14	23.71	12.23	35.51	25.83	33.525	28.607	-0.2289	0.273619
hsa-miR-362-3p	0.12	0	0	0	0.09	0.11	0.1	0	0.28	0.12	0.09	0	0	0	0	0	0	1.95	0	0	0.082	0.204	1.3149	0.274337
hsa-let-7e-3p	1.55	0.47	0.36	0	0.43	0.65	0.39	1.37	0	1.27	3.93	0.8	0.2	0.49	1.43	1.59	1.12	0.18	0.53	0.56	0.649	1.083	0.7387	0.274901
hsa-miR-576-3p	20.75	12.26	9.33	16.88	6.8	4.44	5.81	5.99	121.81	4.97	5.18	10.55	3.41	6.93	7.9	17.05	7.28	79.78	4.77	4.65	20.904	14.75	-0.5031	0.275987
hsa-miR-6511a-3p	6.68	12.91	11.84	8.03	6.54	11.48	10.17	12.1	1.22	12.26	8.31	3.42	11.45	11.62	16.78	3.47	7.93	2.84	9.75	1.67	9.323	7.724	-0.2714	0.280669
hsa-miR-550b-2-5p	0.48	0.09	0.27	0.21	0.43	0.54	0.68	0.37	0.09	0.23	0.36	0.2	0.6	0.88	0.77	0.69	0.84	0.35	0.11	0.19	0.339	0.499	0.5578	0.28318
hsa-miR-607	0.24	0	0.09	0	0.09	0	0.29	0	0.85	0	0	0	0	0.1	0	0	0.19	0.35	0	0	0.156	0.064	-1.2854	0.283538
hsa-miR-509-3-5p	0.36	0.09	0	0.41	0.17	0.11	0.1	0.5	0	0	0.54	0	0	0.1	0.11	0.59	0.19	0.35	0.32	0.93	0.174	0.313	0.8471	0.283606
hsa-miR-4793-3p	0	0	0	0	0	0	0	0	0	0	0	0	0	0	0.11	0.2	0	0	0	0	0	0.031	1.6323	0.283873
hsa-miR-4515	0	0	0	0	0	0	0	0	0	0	0	0	0	0	0.11	0.2	0	0	0	0	0	0.031	1.6323	0.284338
hsa-miR-4689	0	0	0	0.1	0	0	0	0	0.09	0	0	0	0	0	0	0	0	0	0	0	0.019	0	-0.926	0.284773
hsa-miR-664b-5p	0.95	1.59	1.35	1.24	0.77	1.3	1.45	1.37	0.85	1.39	1.61	0.6	1	1.76	1.43	0.79	1.59	0.27	1.59	0	1.226	1.064	-0.2045	0.285692
hsa-miR-4796-5p	0.24	0	0.09	0.1	0.09	0	0.1	0	0	0.12	0.09	0	0.2	0.1	0	0.69	0.09	0.18	0	0.19	0.074	0.154	1.0573	0.286277
hsa-miR-135a-5p	2.86	3.36	2.86	2.26	2.06	3.9	3.3	1.5	7.9	0.92	1.87	2.82	0.6	2.14	1.54	6.34	2.62	4.44	2.96	0.38	3.092	2.571	-0.2662	0.287785
hsa-miR-197-5p	0.72	0.56	0.63	0.93	0.86	1.52	1.26	0.87	0.28	0.93	0.63	0.8	1.31	1.37	0.66	0.3	0.37	0.27	0.64	0.19	0.856	0.654	-0.3883	0.287881
hsa-miR-6781-5p	0.24	0.19	0.27	0.21	0.6	0.87	0.58	0.25	0	0.23	0.09	0.4	0.4	0.98	0.66	0.99	0.28	0.18	0.74	0.37	0.344	0.509	0.5653	0.288636
hsa-miR-147b	0.6	1.03	0.9	0.93	0.43	0.43	0.58	0.25	0.75	0.23	0.8	0.8	0.5	0.68	0.77	2.38	0.84	0.8	0.74	1.49	0.613	0.98	0.6769	0.290716
hsa-miR-3138	0.12	0.65	0.63	0.1	0.69	1.3	1.07	1.75	0.28	0.69	1.16	0.5	1.41	1.56	1.54	1.59	1.21	0.35	0.85	0.56	0.728	1.073	0.5596	0.291163
hsa-miR-152-3p	73.46	43.22	25.83	36.03	41.03	39	30.71	54.16	69.51	43.02	220.69	55.58	26.71	28.41	76.11	125.36	58.25	72.34	26.18	51.29	45.597	74.092	0.7004	0.292396
hsa-miR-939-3p	0	0	0	0	0	0	0	0	0	0	0	0	0.2	0	0	0	0.09	0	0	0	0	0.029	1.5361	0.295147
hsa-miR-200b-3p	19.92	9.17	6.99	38.81	9.29	12.24	8.14	11.11	2.82	10.18	26.55	10.45	3.82	10.15	15.9	20.41	9.05	4.08	10.18	4.65	12.867	11.524	-0.159	0.29594
hsa-miR-7108-3p	0	0	0	0	0	0	0	0	0	0	0	0	0	0.2	0	0	0.09	0	0	0	0	0.029	1.5361	0.295968
hsa-miR-454-5p	28.03	20.49	11.3	6.9	10.67	4.44	7.85	8.61	6.02	6.94	17.34	11.06	3.62	3.71	5.59	4.36	12.88	14.8	7.42	4.27	11.125	8.505	-0.3874	0.296105
hsa-miR-4520-5p	0	0.09	0	0	0	0	0.2	0	0	0	0	0	0	0	0	0	0	0	0	0	0.029	0	-1.5361	0.296472
hsa-miR-4498	0.12	0.28	0.45	0.41	0.34	0.43	0.58	0.37	0.09	0.12	0	0.5	0.6	0.59	0.44	0.69	0.19	0	0.85	1.3	0.319	0.516	0.6938	0.296544
hsa-miR-26b-5p	6616.3	4647.64	4685.88	5049.33	5691.76	4588.51	8183.95	7489.18	2321.67	5508.99	8967.1	3566.87	2554.92	4524.92	5537.29	5456.42	7257.93	3580.86	6022.2	585.34	5478.32	4805.39	-0.1891	0.297396
hsa-miR-2467-5p	0	0	0	0	0.09	0.22	0	0	0	0	0	0	0	0	0	0	0	0	0	0	0.031	0	-1.6323	0.299133
hsa-miR-219a-1-3p	0.95	2.06	1.97	1.44	1.29	1.52	1.84	1.62	0.47	0.58	0.45	1.11	2.21	1.95	1.97	4.26	1.21	0.35	1.38	5.39	1.374	2.028	0.5617	0.299224
hsa-miR-659-3p	0	0	0	0	0	0.22	0.1	0	0	0	0	0	0	0	0	0	0	0	0	0	0.032	0	-1.6781	0.299601
hsa-miR-5582-3p	0.48	0.65	0.9	0.93	0.86	0.11	0.48	0.5	2.73	0.23	0.63	0.2	0.3	0.49	0.44	0.89	0.56	1.95	0.32	0.37	0.787	0.615	-0.3558	0.300762
hsa-miR-4637	0.83	0.94	0.72	0.82	0.77	0.22	0.58	0.37	0.66	0.23	0.36	1.11	0	0.29	0.11	0.2	0.19	1.06	0.42	0.19	0.614	0.393	-0.6437	0.30095
hsa-miR-7844-5p	0.24	0	0.09	0	0	0	0	0	0	0	0	0	0	0	0	0	0	0	0	0	0.033	0	-1.7225	0.30154
hsa-miR-3192-3p	0.12	0	0	0	0.09	0	0.19	0	0	0	0.09	0	0.2	0.2	0.11	0	0	0.09	0.11	0.19	0.04	0.099	1.3074	0.30196
hsa-miR-548p	6.08	5.33	3.05	2.47	5.59	5.85	4.46	5.24	2.07	3.47	5.36	7.54	6.23	4.39	6.14	3.96	4.39	2.22	4.03	11.89	4.361	5.615	0.3646	0.303793
hsa-miR-145-3p	10.14	7.02	3.41	2.16	3.96	2.17	5.62	8.24	7.71	7.86	9.3	1.41	3.11	2.15	3.51	8.62	6.53	8.6	4.88	0.56	5.829	4.867	-0.2602	0.303856
hsa-miR-1910-3p	0	0	0.09	0	0.09	0	0	0	0	0	0.27	0	0	0.1	0.11	0.1	0	0.09	0	0	0.018	0.067	1.8962	0.305355
hsa-miR-1468-5p	5.25	4.96	4.75	4.74	2.84	3.58	3.78	6.61	0.75	5.55	5.99	5.13	2.81	5.95	5.37	6.74	5.13	0.53	5.41	15.98	4.281	5.904	0.4637	0.306903
hsa-miR-7703	0	0	0.18	0.1	0	0.11	0.1	0	0	0.12	0	0	0.1	0	0	0	0.09	0	0	0	0.061	0.019	-1.6828	0.308184
hsa-miR-7706	93.38	100.85	105.19	88.84	87.82	80.93	66.07	66.39	15.24	38.16	9.3	80	56.94	114.8	87.18	132.2	42	7.54	80.24	429.62	74.287	103.982	0.4852	0.308645
hsa-miR-2277-5p	2.03	1.12	1.88	1.24	3.1	5.31	2.42	3.74	1.03	3.35	8.4	1.91	6.63	3.32	3.62	2.28	2.89	1.86	3.29	1.3	2.522	3.55	0.4933	0.310789
hsa-miR-4286	2.39	1.87	4.12	1.13	12.82	17.55	11.14	8.49	1.79	9.37	40.4	1.71	14.86	8.79	16.56	11.3	15.77	4.52	6.78	0	7.067	12.069	0.7721	0.310864
hsa-miR-27a-5p	32.2	16.28	9.24	6.28	15.14	21.78	8.43	18.22	3.67	24.86	56.22	6.23	22.19	18.94	15.9	29.63	14.37	6.12	32.44	20.07	15.61	22.211	0.5088	0.312363
hsa-miR-6780a-3p	0.24	0	0.09	0.21	0.17	0.11	0.1	0.37	0	0.12	0.09	0.2	0	0	0	0.1	0	0.09	0.11	0.19	0.141	0.078	-0.8541	0.313581
hsa-miR-767-5p	0	0	0	0	0	0	0	0	0	0	0.36	0	0	0.1	0	0	0	0	0	0	0	0.046	2.2016	0.314277
hsa-miR-4714-5p	0	0.19	0.18	0.41	0.43	0.11	0.1	0.12	0.38	0.23	0	0.1	0.2	0.39	0	0.1	0.19	0.27	0.11	0	0.215	0.136	-0.6607	0.315091
hsa-miR-6764-5p	0.48	1.22	0.72	1.03	1.46	1.3	1.16	0.37	0	1.04	1.16	1.71	1.41	2.15	2.63	2.18	1.03	0.18	0.64	0.19	0.878	1.328	0.597	0.31706
hsa-miR-127-3p	128.56	82.51	198.45	110.05	328.49	244.43	88.84	386.83	60.76	341.62	516.55	226.13	144	123.98	209.13	471.92	275.08	31.47	52.58	767.45	197.054	281.829	0.5162	0.317503
hsa-miR-766-5p	2.62	1.4	1.7	0.82	1.98	1.08	2.33	2.5	0.19	2.54	4.56	1.31	1.81	2.25	4.17	2.68	2.33	0.18	2.76	2.42	1.716	2.447	0.512	0.317892
hsa-miR-548ap-5p	19.92	17.4	13	7.92	14.7	13.87	22.09	24.2	4.14	20.35	48.36	22.21	12.25	11.22	33.01	41.62	17.74	4.97	16.54	13.93	15.759	22.185	0.4934	0.319412
hsa-miR-628-5p	4.41	3.46	1.79	0.93	2.24	1.52	3.1	2.12	8.47	2.89	5.45	1.61	0.7	1.76	2.19	3.47	2.8	6.29	1.7	0.74	3.093	2.671	-0.2116	0.320846
hsa-miR-19b-3p	200.47	123.58	55.24	105.93	97.63	33.48	64.71	51.66	746.27	32.14	92.42	71.16	29.32	40.9	65.25	49.56	57.5	603.7	42.82	1.12	151.111	105.375	-0.5201	0.324822
hsa-miR-624-5p	6.32	5.24	6.1	5.97	26.92	22.43	18.02	14.72	4.99	13.76	21.63	9.95	17.88	15.62	22.04	13.08	25.3	22.87	19.08	0.74	12.447	16.819	0.4343	0.3255
hsa-miR-508-3p	0	0.09	0.09	0.1	0.52	0	0.29	0.37	0.09	0.23	0.45	0.4	0.1	0.39	0.44	0.3	0.37	0.18	0.11	0.19	0.178	0.293	0.719	0.326445
hsa-miR-3683	0.24	0	0.36	0.31	0.09	0	0.1	0	0	0.12	0	0.1	0.1	0.1	0	0.2	0	0.09	0	0	0.122	0.059	-1.0481	0.327517
hsa-miR-516b-5p	0.83	1.12	0	0.1	0	0	0.1	0.62	0	0	0.18	0.5	0	0	0	0.1	0.28	0	0.11	0.19	0.277	0.136	-1.0263	0.328002
hsa-miR-6809-5p	0	0.09	0	0.1	0.09	0.11	0	0	0	0.12	0.09	0.1	0.1	0.2	0.22	0	0.19	0	0	0.19	0.051	0.109	1.0958	0.328378
hsa-miR-301a-5p	11.21	8.14	4.75	4.01	7.83	3.14	7.75	6.36	3.86	6.48	14.39	5.13	2.41	3.42	5.26	5.65	5.04	7.27	4.77	2.04	6.353	5.538	-0.1981	0.328674
hsa-miR-6766-5p	0	0	0.18	0.1	0	0	0.1	0	0	0	0	0.2	0	0.39	0	0	0.09	0	0	0.37	0.038	0.105	1.4663	0.328939
hsa-miR-30c-1-3p	7.99	3.93	6.73	3.19	4.82	8.99	5.52	7.86	1.88	7.05	15.28	4.12	10.75	6.44	8.88	6.05	6.72	3.19	9.54	6.13	5.796	7.71	0.4117	0.328965
hsa-miR-148b-3p	2379.87	1817.76	1016.89	850.92	3964.13	3947	2062.14	3159.41	714.66	2788.44	5254.62	2331.02	3809.19	2496.11	3489.53	2525.3	2776.28	1083.11	2693.41	2966.49	2270.12	2942.51	0.3743	0.330386
hsa-miR-4635	0.48	0.19	0.63	0.51	0.77	0.11	0.1	0.12	0.19	0.69	0.36	0.2	0.1	0	0.77	0.59	0.37	0.18	0.21	0.19	0.379	0.297	-0.3517	0.332496
hsa-miR-744-3p	0.24	0.19	0.18	0.21	0.34	0.11	0.19	0.5	0.19	0.46	2.68	0.5	0.1	0.29	0.22	0.1	0.56	0.09	0.21	0.19	0.261	0.494	0.9205	0.332557
hsa-miR-6859-3p	0.72	1.59	1.08	0.72	0.86	1.3	0.97	2.25	0.19	1.62	0.72	0.5	1.31	1.46	1.86	0.99	1.12	0.27	0.95	0	1.13	0.918	-0.2998	0.33298
hsa-miR-629-5p	303.74	256.51	413.04	301.62	199.56	221.46	233.28	205.89	114.66	177.63	213.27	174.07	335.31	244.05	227.77	217.33	207.5	179.96	274.86	74.14	242.739	214.826	-0.1762	0.333088
hsa-miR-4695-3p	0.12	0.09	0.36	0.1	0.17	0.98	0.19	0.5	0	0.23	0.98	0	1.61	0.29	0.33	0.5	0.37	0.09	0.53	0	0.274	0.47	0.7785	0.333302
hsa-miR-4781-3p	2.86	4.3	3.05	3.81	3.78	3.47	4.46	2.37	1.03	2.43	5.18	4.22	2.41	2.93	2.63	2.18	1.96	1.42	3.29	1.3	3.156	2.752	-0.1976	0.333392
hsa-miR-370-5p	0	0.09	0.27	0.1	0.26	0.76	0.1	0.87	0	0.23	0.27	0.2	0.4	0	0.44	0	0.28	0.09	0	0	0.268	0.168	-0.6738	0.33495
hsa-miR-1304-3p	5.13	4.21	3.86	2.47	2.15	1.95	2.52	7.74	0.94	3.35	9.56	3.22	2.41	4.39	4.72	3.96	6.53	1.42	2.86	8.18	3.432	4.725	0.4613	0.335149
hsa-miR-6858-3p	0	0	0	0	0.09	0	0	0.12	0	0	0.36	0	0.2	0	0	0.1	0	0	0.11	0	0.021	0.077	1.8745	0.335807
hsa-miR-210-3p	23.73	23.39	23.4	19.25	76.9	100.33	59.39	66.39	12.51	72.86	76.16	69.85	127.74	68.04	68.76	39.64	52.09	38.74	70.49	13.01	47.815	62.452	0.3853	0.337812
hsa-miR-3944-5p	0.36	0.37	0.36	0.51	0.52	0.22	0.29	0.62	0.09	0.46	0.63	0.5	0.8	0.98	0.44	0.5	0.37	0.27	0.74	0.19	0.38	0.542	0.5123	0.338908
hsa-miR-671-5p	1.43	0.37	0	0.31	0.34	0.65	1.26	2	2.16	2.08	2.06	0.3	0.1	0.1	0.55	0.99	0.75	1.77	1.38	0	1.06	0.8	-0.406	0.339517
hsa-miR-485-5p	3.46	1.96	4.04	1.85	2.84	4.77	2.23	5.99	1.13	6.82	4.47	4.12	2.11	3.12	4.39	10.01	3.73	0.18	1.06	16.35	3.509	4.954	0.4975	0.340124
hsa-miR-6750-3p	0.36	0.19	0.18	0.1	0.43	0.54	0.1	0.12	0.09	0	0.36	0.6	0.3	0.49	0.44	0.2	0.09	0.09	0.21	0.56	0.211	0.334	0.6626	0.342392
hsa-miR-6763-5p	0	0	0.09	0	0	0	0	0.12	0	0	0.18	0.1	0	0.29	0	0.1	0	0	0	0	0.021	0.067	1.6738	0.343383
hsa-miR-128-3p	6191.28	3840.21	4013.33	3127.5	4265.44	2976.55	5565.44	3656.31	438.69	3443.57	5288.68	5775.48	4063.85	3029.4	4396.23	6921.63	4813.39	916.98	4531.91	8532.83	3751.83	4827.04	0.3635	0.344371
hsa-miR-6785-5p	0	0.09	0.27	0.31	0.17	0.11	0.1	0.5	0.09	0.12	0	0	0.2	0.1	0.22	0.1	0.09	0	0.21	0.37	0.176	0.129	-0.4482	0.348976
hsa-miR-29a-5p	0	0.09	0.09	0	0	0	0.1	0.5	0	0.23	0.18	0	0	0.1	0	0.2	0.09	0	0	0	0.101	0.057	-0.8253	0.349083
hsa-miR-27b-3p	759.18	508.26	382.64	407.86	715.82	721.14	591.63	780.9	315.95	777.14	2077.29	451.45	393.55	606.9	765.57	1148.98	1059.9	868.4	638.35	180.62	596.052	819.101	0.4586	0.350467
hsa-miR-1304-5p	9.78	8.23	9.24	8.75	6.19	6.28	7.75	13.98	3.39	3.82	3.93	7.54	6.83	7.03	8.44	6.94	10.55	2.3	6.89	6.13	7.741	6.658	-0.2174	0.350625
hsa-miR-4787-3p	0.6	0	0.09	0.1	0	0	0.1	0	0	0.23	0.36	0.1	0.2	0	0.44	0.3	0.19	0	0.21	0.19	0.112	0.199	0.8293	0.352796
hsa-miR-4659a-5p	0	0	0	0	0.09	0.11	0.19	0.12	0	0	0.09	0.1	0	0.1	0.11	0	0	0.18	0.32	0.19	0.051	0.109	1.0958	0.35362
hsa-miR-7155-5p	0.12	0	0	0.21	0.09	0.33	0	0.25	0	0.12	0	0.1	0	0.2	0.11	0.1	0.09	0	0	0	0.112	0.06	-0.9005	0.354465
hsa-miR-517b-3p	0.48	0.94	0	0	0	0	0.2	0.24	0	0	0.36	1.4	0	0.2	0.88	0	0.94	0	0	0	0.186	0.378	1.0231	0.356414
hsa-miR-517a-3p	0.48	0.94	0	0	0	0	0.2	0.24	0	0	0.36	1.4	0	0.2	0.88	0	0.94	0	0	0	0.186	0.378	1.0231	0.356572
hsa-miR-3158-5p	0	0	0.18	0.1	0.09	0.43	0.19	0.25	0.09	0.46	0.27	0	0.4	0.2	0.11	0	0	0	0.21	0	0.179	0.119	-0.589	0.356718
hsa-miR-4473	9.66	8.51	6.01	7.82	11.96	8.78	14.05	9.48	1.79	9.14	10.64	10.95	10.04	8.49	10.2	13.87	11.39	2.13	10.92	22.3	8.72	11.093	0.3472	0.356743
hsa-miR-548j-5p	18.13	16.46	12.46	7.51	12.64	12.35	19.57	20.96	3.95	18.27	42.37	20.7	11.15	10.15	30.16	38.25	15.59	3.99	14.1	11.89	14.23	19.835	0.4791	0.357041
hsa-miR-181c-3p	5.72	2.53	1.52	0.72	8.52	7.26	5.13	7.36	1.5	8.21	24.67	3.72	4.82	4.69	11.62	6.84	6.63	2.84	5.62	1.11	4.847	7.256	0.5821	0.357397
hsa-miR-2277-3p	0	0.09	0	0	0.34	0.76	0.19	0.25	0.09	0	0.98	0	0.5	0.39	0.22	0	0.19	0.35	0.11	0.19	0.172	0.293	0.7685	0.357402
hsa-miR-3680-3p	0	0.37	0.81	0.62	0.43	0.43	0.78	1	0	0.46	0.09	0.2	0.3	0.2	0.66	0	0.19	0.62	0.74	0.19	0.49	0.319	-0.6192	0.358823
hsa-miR-625-5p	4.41	3.37	7.71	2.26	3.44	7.15	5.43	4.49	2.92	6.01	14.66	2.31	7.73	4.39	7.68	3.77	7.65	9.04	6.47	1.67	4.719	6.537	0.4701	0.359108
hsa-miR-642a-3p	1.43	0.56	0.54	0.1	0.17	0.33	0	0.12	0.19	0.93	1.43	0.1	0.6	0.88	0.22	0.59	0.84	0.09	0.85	1.3	0.437	0.69	0.659	0.363399
hsa-miR-6819-3p	0.36	0.28	0.09	0	0.26	0.54	0.87	0.5	0	0.23	0.89	0.5	0.5	0.68	0.55	0.69	0.19	0	0.42	0.19	0.313	0.461	0.5586	0.363931
hsa-miR-1179	0	0	0.09	0	0	0	0.29	0.12	0	0	0.09	0.1	0	0.1	0.11	0.1	0.19	0.27	0.11	0	0.05	0.107	1.0976	0.364287
hsa-miR-1537-5p	0	0	0	0	0	0.11	0.1	0	0	0	0.09	0	0	0.1	0	0	0.09	0.27	0	0	0.021	0.055	1.389	0.364804
hsa-miR-30b-3p	5.49	3.93	4.3	2.37	3.78	5.53	4.17	4.62	0.85	3.93	11.62	1.11	8.13	5.86	7.79	4.46	5.97	1.33	4.88	3.16	3.897	5.431	0.4789	0.368595
hsa-miR-5094	0.24	0.28	0	0	0	0	0.1	0	0.47	0	0.27	0	0	0	0	0.1	0	0.18	0.11	0	0.109	0.066	-0.7238	0.368616
hsa-miR-4685-3p	11.57	20.02	30.67	19.35	29.16	30.23	18.89	27.83	3.86	13.53	13.32	10.85	20.99	35.34	27.2	20.32	17.08	5.5	19.61	7.8	20.511	17.801	-0.2044	0.369454
hsa-miR-490-5p	0.12	0	0.18	0	0	0	0.29	0.12	0.19	0	0.09	0.1	0	0.1	0.22	0	0	0	0.11	0	0.09	0.062	-0.5377	0.372534
hsa-miR-5189-5p	0.12	1.5	3.41	2.47	4.56	0.33	2.52	0.25	0.66	3.01	0	2.41	3.62	0.39	2.41	0.3	1.77	0.8	1.48	0	1.883	1.318	-0.5147	0.375256
hsa-miR-4747-5p	0.36	0.47	0.54	0	0.09	0.87	0.19	0.5	0.28	0.23	0.18	0.3	0.8	0.2	0	0.4	0.09	0.09	0.32	0.19	0.353	0.257	-0.4579	0.375636
hsa-miR-4533	0.24	0.56	0.09	0.1	0	0	0.1	0.12	0.19	0.23	0.72	0.4	0.1	0	0.33	0.4	0.28	0	0.21	0.56	0.163	0.3	0.8801	0.375731
hsa-miR-1538	0.95	0.65	1.52	1.34	0.6	1.84	1.26	0.87	0.28	0.93	1.61	0.3	2.11	1.27	2.19	2.58	1.68	0.35	1.27	1.3	1.024	1.466	0.5177	0.376079
hsa-miR-6715b-3p	0	0	0.09	0	0	0	0.1	0.12	0	0.12	0.09	0	0	0	0	0	0	0	0	0	0.043	0.009	-2.2563	0.376269
hsa-miR-3180-5p	0.24	0.28	0.45	0.41	0.69	0.11	0.97	0	0	0.23	0.27	0.6	0.5	0.49	0.77	0.5	0.28	0.35	0.32	0.74	0.338	0.482	0.512	0.376299
hsa-miR-509-5p	0	0	0	0	0.09	0	0	0	0	0	0.09	0	0	0	0	0	0.09	0.09	0.11	0	0.009	0.038	2.078	0.376518
hsa-miR-365b-5p	0.72	0.65	0.18	0.31	0.17	0.22	0.19	0.25	0.09	0.12	0.18	0	0	0.39	0.22	0.3	0.28	0.09	0.11	0.56	0.29	0.213	-0.4452	0.377736
hsa-miR-134-5p	22.18	10.85	27.26	12.76	35.44	24.49	10.75	31.57	12.23	34.35	35.13	21.71	13.26	12.79	19.96	48.76	26.14	4.43	8.27	13.01	22.188	20.346	-0.125	0.379491
hsa-miR-4632-3p	0	0	0	0	0	0	0	0.12	0	0	0.18	0	0.1	0	0	0.1	0	0	0.11	0	0.012	0.049	2.0297	0.379967
hsa-miR-548at-3p	0.36	0.65	0.18	0.1	0.26	0.54	0.19	0.37	0.19	0.23	0.54	1.21	0.3	0	0.11	0.5	0.93	0.35	0.21	0.37	0.307	0.452	0.5581	0.379981
hsa-miR-3617-3p	0	0	0	0	0	0.11	0	0	0	0	0.18	0.1	0	0	0	0.1	0	0	0.11	0	0.011	0.049	2.1553	0.380619
hsa-miR-6796-5p	0	0	0	0	0	0	0	0	0	0.12	0.09	0	0.1	0	0	0	0.09	0.09	0	0	0.012	0.037	1.6245	0.381505
hsa-miR-382-5p	25.52	12.44	35.78	12.15	22.02	22.1	5.72	28.95	9.97	34.69	35.57	14.17	12.65	13.86	19.52	46.68	24.55	6.03	6.15	14.12	20.934	19.33	-0.115	0.381638
hsa-miR-3195	0.12	0	0	0	0.17	0.11	0	0	0	0	0.36	0	0	0.29	0.44	0.1	0	0	0	0	0.04	0.119	1.5729	0.381851
hsa-miR-223-5p	408.33	276.81	254.67	174.28	117.67	117.88	192.88	221.87	178.71	189.43	223.37	115.98	122.61	193.58	242.14	521.67	147.29	89.18	213.06	157.58	213.253	202.646	-0.0736	0.381886
hsa-miR-4425	0	0.09	0	0	0	0	0	0	0	0	0.18	0.1	0	0	0	0.1	0	0.09	0	0	0.009	0.047	2.3847	0.382379
hsa-miR-3928-5p	0	0	0	0	0.09	0	0	0	0	0	0.09	0	0	0	0.22	0	0.09	0	0.11	0	0.009	0.051	2.5025	0.387011
hsa-miR-4645-3p	0.6	0.75	0.18	0.62	0.95	0.87	1.36	1.25	0.28	1.04	1.97	1.01	0.5	1.27	1.64	1.29	1.03	0.62	1.38	0.19	0.79	1.09	0.4644	0.387095
hsa-miR-499a-5p	3.34	3.09	2.6	3.6	6.02	3.25	5.62	4.87	3.67	2.43	4.92	2.81	1.81	4.88	7.35	18.63	4.01	5.67	3.92	1.3	3.849	5.53	0.5228	0.388351
hsa-miR-3064-5p	2.27	1.22	2.87	1.65	1.46	2.17	2.42	1.87	0.19	1.16	2.41	0.9	3.21	4	3.29	2.97	1.59	0.44	2.23	2.42	1.728	2.346	0.4411	0.388628
hsa-miR-600	0	0	0	0.1	0.17	0	0.19	0.12	0	0.12	0	0.1	0.2	0	0	0	0	0	0	0	0.07	0.03	-1.2224	0.388983
hsa-miR-34a-5p	0.48	0.56	0.63	1.54	0.52	2.06	1.36	1.62	1.13	1.16	5.63	0.9	1.51	1.37	1.86	1.09	2.05	1.77	0.85	0.19	1.106	1.722	0.6387	0.389104
hsa-miR-4482-5p	0.83	0.65	0	0	0	0.22	0	0	0	0	0	0.3	0	0	0	0.1	0	0	0.32	0	0.17	0.072	-1.2395	0.389268
hsa-miR-3916	0	0	0.09	0	0	0	0	0.12	0	0	0.18	0	0	0.1	0	0	0	0.27	0	0	0.021	0.055	1.389	0.389301
hsa-miR-128-1-5p	1.67	1.22	1.08	0.51	1.46	0.76	0.78	1.5	0.09	1.39	3.22	1.41	1.51	1.07	1.86	1.39	0.84	0.71	0.85	1.11	1.046	1.397	0.4174	0.390259
hsa-miR-3667-5p	0	0.37	0.18	0	0.52	0.76	0.39	0.75	0.19	1.39	1.07	0.8	1.21	0.78	0.77	0	0.93	0.62	0.42	0	0.455	0.66	0.5366	0.390313
hsa-miR-329-3p	6.92	2.99	8.25	2.26	13.07	9.43	7.07	22.96	2.35	26.25	39.51	5.03	3.72	2.05	3.95	6.05	22.12	3.72	2.86	0.93	10.155	8.994	-0.1752	0.391393
hsa-miR-378e	0.12	0.28	0.36	0.21	1.38	1.52	0.68	0.62	2.45	0.69	2.86	1.01	1.51	0.49	1.1	1.29	1.21	2.3	0.64	1.49	0.831	1.39	0.7422	0.392003
hsa-miR-6885-5p	0	0	0	0	0	0.11	0	0	0	0	0.09	0	0	0.1	0.22	0	0	0.09	0	0	0.011	0.05	2.1844	0.392063
hsa-miR-432-3p	0	0	0.18	0	0.17	0.11	0	0	0.09	0.12	0.27	0	0	0	0	0	0	0	0.11	0	0.067	0.038	-0.8182	0.392406
hsa-miR-1271-5p	6.32	3.18	3.77	1.34	5.25	6.72	4.65	8.11	1.6	11.45	29.68	3.42	7.53	4.39	7.57	3.47	10.27	3.19	6.04	1.86	5.239	7.742	0.5634	0.394018
hsa-miR-493-5p	29.22	13.56	41.43	11.01	45.07	72.05	21.22	124.66	4.14	145.13	110.93	16.38	36.96	26.45	47.92	61.05	85.78	7.27	21.2	20.44	50.749	43.438	-0.2244	0.39421
hsa-miR-185-5p	3637.18	3890.54	3092.38	2618.76	3406.06	2806.13	3325.24	2414.45	10601.6	2871.94	2605.1	3366.58	2730.76	2178.75	2201.3	2011.95	3251.21	10171.9	3250.03	410.86	3866.43	3217.84	-0.2649	0.394719
hsa-miR-214-5p	0	0.09	0	0.31	0.09	0.65	0	0.12	0	0.12	0	0	0.2	0.1	0	0	0	0.09	0.11	0.19	0.138	0.069	-1	0.394771
hsa-miR-22-3p	2600.37	2341.36	1848.61	2206.57	3724.58	2488.14	3294.43	1950.63	939.84	2648.62	3392.4	2690.61	1924.17	1744.64	2538.3	1853.49	2972.95	1733.96	2043.51	666.73	2404.32	2156.08	-0.1572	0.395666
hsa-miR-130b-3p	13.83	23.29	16.23	21	33.37	30.01	34.49	25.21	20.32	21.97	28.16	13.67	21.39	27.63	28.84	17.94	29.59	25.71	19.29	1.49	23.972	21.371	-0.1657	0.396591
hsa-miR-4669	2.74	0.09	5.56	7.93	3.35	3.25	0	3.12	0	2.2	0.09	2.61	0.1	12.59	0.11	0.2	0	0.09	0.21	0	2.824	1.6	-0.8197	0.397708
hsa-miR-199a-3p	1363.44	694.32	474.38	570.2	844.07	1008.58	1217.66	1523.87	562.57	984.03	4806.9	431.95	452	997.76	2022.43	1666.29	1802.53	1063.34	663.68	101.09	924.312	1400.8	0.5998	0.397941
hsa-miR-199b-3p	1363.44	694.32	474.38	570.2	844.07	1008.58	1217.66	1523.87	562.57	984.03	4806.9	431.95	452	997.76	2022.43	1666.29	1802.53	1063.34	663.68	101.09	924.312	1400.8	0.5998	0.397982
hsa-miR-6133	0	0	0	0	0	0	0	0	0	0	0	0	0.3	0	0	0	0	0	0	0	0	0.03	1.585	0.398296
hsa-miR-3160-5p	0.24	0	0	0	0	0.11	0	0	0	0.12	0.09	0	0	0	0.11	0	0	0	0	0	0.047	0.02	-1.2327	0.398418
hsa-miR-6836-3p	0	0.09	0.09	0.1	0.09	0.11	0	0.12	0.09	0.12	0	0	0.1	0.1	0.11	0	0	0	0.11	0	0.081	0.042	-0.9475	0.39986
hsa-miR-3148	0	0	0	0	0	0.11	0	0	0.09	0	0	0	0	0.2	0.11	0	0	0	0	0.56	0.02	0.087	2.121	0.400044
hsa-miR-502-5p	0.6	0.75	0.99	0.21	1.03	0.87	1.07	1.25	0.75	1.27	0.98	0.8	0.6	0.68	0.77	0.2	0.37	1.51	0.85	0	0.879	0.676	-0.3788	0.40068
hsa-miR-181d-3p	0	0	0	0	0	0	0.19	0.12	0.09	0	0.09	0	0	0	0	0	0.09	0	0	0	0.04	0.018	-1.152	0.40126
hsa-miR-548ax	0	0	0.18	0	0.09	0	0.1	0	0	0	0	0	0	0	0	0.1	0	0	0	0	0.037	0.01	-1.8875	0.402123
hsa-miR-150-3p	18.72	10.1	11.03	6.59	12.3	19.61	8.43	17.72	2.45	11.1	39.6	5.93	11.05	12.5	14.48	14.96	12.79	4.7	15.58	24.71	11.805	15.63	0.4049	0.402897
hsa-miR-6868-3p	0.72	0	1.35	0.93	1.89	1.84	1.45	0.75	1.41	1.16	0.63	0.1	0.4	0.88	0	2.28	1.77	0	0.21	2.79	1.15	0.906	-0.3441	0.402939
hsa-let-7c-3p	0	0	0	0	0	0.33	0	0	0	0	0	0	0	0	0	0	0	0	0	0	0.033	0	-1.7225	0.403352
hsa-miR-4773	0	0.09	0	0	0	0	0.1	0	0	0.12	0.09	0	0.1	0	0.11	0.1	0.37	0	0	0	0.031	0.077	1.3126	0.403957
hsa-miR-676-3p	0	0	0.09	0	0	0	0	0	0	0	0.27	0	0	0	0	0	0	0.09	0.11	0	0.009	0.047	2.3847	0.405033
hsa-miR-5004-3p	1.07	0.28	0.09	0.1	0.26	0	0.19	0.12	0	0.35	0.27	0.6	0.2	0.1	0.33	0.4	0.19	0	0.42	1.11	0.246	0.362	0.5573	0.405334
hsa-miR-6754-5p	0	0	0	0.1	0	0	0.19	0.12	0	0	0	0	0.1	0	0	0	0	0	0	0	0.041	0.01	-2.0356	0.405781
hsa-miR-4489	0.24	0.28	0.63	0.62	0.43	0.54	0.1	0.5	0.09	0	0.54	0.6	0.6	1.17	0.22	0.3	0.19	0.09	0.11	1.3	0.343	0.512	0.5779	0.406079
hsa-miR-3687	0	0	0.27	0.1	0.09	0.11	0	0.25	0.19	0.12	0.09	0.1	0.6	0.39	0.33	0.4	0.09	0	0.11	0	0.113	0.211	0.9009	0.40679
hsa-miR-548x-3p	0.12	0	0	0.1	0	0	0	0	0.65	0	0	0.1	0	0	0	0	0	0.27	0	0	0.087	0.037	-1.2335	0.406928
hsa-miR-654-5p	8.59	3.18	11.12	3.5	11.27	8.67	3.39	13.85	2.82	16.77	15.55	6.33	4.62	4	6.36	10.31	11.67	2.48	2.23	9.48	8.316	7.303	-0.1874	0.406974
hsa-miR-31-5p	2.74	1.5	1.08	0.31	3.87	3.03	2.33	5.12	1.98	5.78	16.71	0.8	1	1.17	3.95	1.98	7	5.32	4.35	0.56	2.774	4.284	0.627	0.407211
hsa-miR-6807-3p	0	0	0	0	0	0	0	0.12	0	0	0	0	0	0.1	0	0.1	0	0	0.21	0	0.012	0.041	1.7726	0.408413
hsa-miR-6845-3p	0.24	0	0	0.1	0	0	0	0	0	0	0	0	0.3	0.1	0	0.1	0	0.09	0.11	0	0.034	0.07	1.0418	0.409085
hsa-miR-3159	0	0.09	0.18	0	0.09	0	0.1	0.25	0	0	0.36	0	0	0.1	0.22	0.2	0.19	0.18	0.11	0	0.071	0.136	0.9377	0.409273
hsa-miR-3174	0.6	0.37	0.36	0.31	0.26	0	0.29	0	0.09	0.35	0.27	0	0.4	0	0	0.4	0.09	0	0.11	0.74	0.263	0.201	-0.3879	0.409408
hsa-miR-154-3p	0	0	0	0	0.26	0	0	0.25	0.09	0	0.36	0.2	0	0	0.11	0.1	0.19	0.18	0.11	0	0.06	0.125	1.0589	0.409786
hsa-miR-378f	2.74	4.3	2.78	1.96	6.28	8.67	5.62	2.87	2.82	2.66	12.42	4.92	7.93	4.59	4.17	2.87	2.99	5.94	4.56	3.34	4.07	5.373	0.4007	0.410361
hsa-miR-1248	7.87	2.06	1.26	4.22	3.27	1.41	1.84	3.37	0	1.62	6.61	3.72	1.21	1.27	1.54	4.96	0.93	0	1.59	0.19	2.692	2.202	-0.2899	0.410541
hsa-miR-330-3p	99.1	62.87	38.02	49.62	56.77	53.74	81.38	107.94	15.24	76.9	173.32	72.56	53.93	64.72	118.55	142.71	52.74	9.66	58.83	111.87	64.158	85.889	0.4208	0.411509
hsa-miR-520h	0.24	0	0	0	0	0	0.1	0.12	0	0	0	0.1	0	0	0	0	0	0	0	0	0.046	0.01	-2.2016	0.412003
hsa-miR-6808-3p	0.36	0.65	0.54	1.34	0.52	0.54	0.29	0.5	0	0.46	0.27	0.6	0.7	0.29	0.88	0.4	0.37	0.09	0	0.56	0.52	0.416	-0.3219	0.41331
hsa-miR-548e-3p	6.2	4.12	1.43	2.57	1.81	0.54	1.36	1.62	13.73	0.81	1.88	1.51	0.3	1.46	1.43	2.18	2.05	13.56	0.85	0.37	3.419	2.559	-0.418	0.413955
hsa-miR-449b-5p	0.12	0.09	0	0	0.17	0.22	0.19	0.37	0.19	0	0.09	0	0.7	0.39	0	0.4	0	0.62	0.11	0	0.135	0.231	0.7749	0.414754
hsa-miR-7111-3p	0.24	0.19	0.18	0.1	0.26	0	0.1	0.25	0	0.23	0	0	0.3	0	0.11	0	0	0	0.11	0.56	0.155	0.108	-0.5212	0.416251
hsa-miR-942-5p	125.22	123.2	127.07	122.6	60.64	93.83	103.08	104.44	21.16	121.08	75.17	75.68	116.59	109.33	162.63	62.14	94.74	22.87	124.34	58.16	100.232	90.165	-0.1527	0.416534
hsa-miR-3065-5p	0	0.37	0	0.21	0.17	0.33	0.39	0.12	0.56	0.93	1.16	0.2	0.1	0	0.33	0.1	0.37	0.27	0.11	0	0.308	0.264	-0.2224	0.416558
hsa-miR-1827	1.55	2.34	3.95	2.57	2.75	4.77	5.04	2.87	1.69	2.31	3.75	1.01	4.22	5.47	4.39	7.53	3.73	3.99	2.54	2.79	2.984	3.942	0.4017	0.416682
hsa-miR-2355-5p	0.24	0	0	0	0.09	0	0.19	0	0.38	0	1.34	0.2	0	0	0.11	0.2	0	0.44	0.11	0	0.09	0.24	1.415	0.417511
hsa-miR-3686	0	0	0	0	0	0	0.1	0	0	0	0	0	0.1	0	0.11	0	0	0.18	0	0	0.01	0.039	1.9635	0.417897
hsa-miR-6741-3p	7.39	5.15	4.48	8.96	6.11	4.01	7.94	8.98	0.56	7.05	4.65	5.43	4.42	7.61	11.95	8.23	6.35	0.98	9.22	19.33	6.063	7.817	0.3666	0.41804
hsa-miR-6799-3p	0.95	1.12	0.9	0.62	0.77	0.54	1.65	0.75	0.47	0.46	0.8	0.6	0.9	0.88	1.21	0.59	0.93	0.27	1.06	0	0.823	0.724	-0.1849	0.418095
hsa-miR-5196-3p	0.72	0.56	0.18	0.1	0.43	0.11	0.19	0.75	0.09	0.69	0.72	0.2	0.4	0	0.55	0.3	0.19	0	0.21	0.56	0.382	0.313	-0.2874	0.418558
hsa-miR-345-3p	0	0	0.09	0	0	0	0	0	0	0	0.18	0	0	0	0	0	0.09	0.18	0	0	0.009	0.045	2.3219	0.419651
hsa-miR-125b-5p	63.09	144.44	55.42	58.78	102.71	92.64	202.96	86.6	15.14	368.56	307.84	222.41	90.58	59.06	82.46	47.86	82.79	28.45	49.82	35.31	119.034	100.658	-0.2419	0.420255
hsa-miR-3613-5p	19.56	13.28	41.52	37.78	87.56	160.13	248.3	183.81	86.06	70.89	56.31	37.79	174.63	131.98	171.63	160.25	105.94	298.12	127.94	3.53	94.889	126.812	0.4184	0.421839
hsa-miR-6505-3p	1.31	1.87	0.27	1.03	0.6	0.43	0.29	0.37	0.09	0.12	0.18	0.6	0	0.2	0.55	0.4	0.56	0	0.42	1.67	0.638	0.458	-0.4782	0.42186
hsa-miR-106b-5p	191.52	180.08	108.33	126.83	596.95	299.9	325.51	229.6	386.49	274.43	466.76	179.9	215.4	226.57	219.55	208.81	347.61	1412.61	252.29	10.96	271.964	354.046	0.3805	0.42212
hsa-miR-6786-3p	1.67	2.06	1.17	1.24	1.29	1.63	1.84	1	0.09	1.39	0.98	1.41	2.61	1.46	1.97	1.68	0.84	0.44	1.38	4.46	1.338	1.723	0.3648	0.42238
hsa-miR-939-5p	3.58	3.84	3.77	5.15	1.81	4.01	3	2.87	1.79	3.47	1.97	2.01	5.12	4.49	4.72	3.37	3.55	1.24	2.54	1.86	3.329	3.087	-0.1089	0.422656
hsa-miR-338-3p	1.79	1.03	0.18	0.21	1.63	0.98	2.33	1.5	0.38	1.85	5.9	0.4	0.8	1.85	1.75	1.19	2.33	0.71	2.44	0.19	1.188	1.756	0.5638	0.426115
hsa-miR-33b-3p	0.48	0.19	0.18	0.1	0.52	0.43	0.39	0.25	0	0.35	0.8	0.2	1.31	0.2	0.44	0.59	0.37	0.09	0.32	0	0.289	0.432	0.58	0.427414
hsa-let-7c-5p	1273.41	1473.5	2129.56	1708.85	2973.48	4884.94	3319.42	2762.35	665.47	2150.54	2766.71	1229.63	5243.4	4123.61	3358.48	3576.96	3307.87	1737.24	2500.28	1565.38	2334.15	2940.96	0.3334	0.427466
hsa-miR-4748	0	0	0	0	0	0.43	0.1	0.12	0	0	0	0.2	0.3	0.2	0.11	0.1	0.09	0	0.21	0	0.065	0.121	0.8965	0.430017
hsa-miR-4781-5p	0	0	0	0	0.17	0.11	0	0.12	0	0.12	0	0.4	0	0.1	0	0.2	0	0	0.32	0	0.052	0.102	0.972	0.430054
hsa-miR-1197	0	0	0	0	1.2	0.22	0.19	0.5	0	0.35	1.61	0.5	0.1	0.2	0.22	0.5	0.75	0.18	0.11	0	0.246	0.417	0.7614	0.430631
hsa-miR-6882-5p	0.95	0.47	1.26	0.51	0.43	0.76	0.68	0.75	0.19	1.04	0.8	1.31	0.5	0	0.44	0.5	0.28	0.8	0.21	0.37	0.704	0.521	-0.4343	0.430794
hsa-miR-29b-2-5p	8.94	9.35	5.65	9.06	9.12	17.77	8.62	13.6	5.93	15.5	19.04	4.62	8.13	13.86	14.59	3.96	13.72	7.36	9.33	0.37	10.354	9.498	-0.1245	0.436358
hsa-miR-659-5p	6.68	10.38	5.92	7.82	6.37	4.77	5.33	3.37	2.07	2.54	3.04	9.55	4.02	5.17	4.93	6.05	4.29	1.77	4.56	26.94	5.525	7.032	0.348	0.436683
hsa-miR-25-5p	17.17	10.29	18.65	9.99	7.05	15.82	10.46	14.35	3.2	14.22	21.81	7.74	24.7	20.89	16.45	14.77	13.07	4.96	19.4	12.26	12.12	15.605	0.3646	0.43718
hsa-miR-4734	0	0.19	0.09	0	0.43	0.65	0.29	0.25	0	0.23	0.36	0.1	0.5	0.59	0.33	0.4	0.19	0.09	0.42	0.19	0.213	0.317	0.5736	0.438527
hsa-miR-619-5p	1.07	0.65	1.26	0.82	0.69	0.98	0.97	1.25	0.19	0.93	1.52	0.7	1.51	1.37	1.86	1.68	0.47	0.18	0.74	1.86	0.881	1.189	0.4325	0.439626
hsa-miR-340-5p	120.57	54.26	40.62	46.63	99.52	76.82	45.15	48.29	266.85	46.37	191.28	68.74	49.81	77.8	93.32	155.69	69.07	554.23	43.46	2.97	84.508	130.637	0.6284	0.440009
hsa-miR-375	0.6	1.59	1.08	2.57	0.52	1.41	0.58	0.75	0.09	0.81	0.8	1.21	0.7	1.17	0.99	0.5	0.84	0.27	1.06	0.93	1	0.847	-0.2396	0.440967
hsa-miR-3164	0.48	0.84	0.81	1.44	0.26	0.22	0.78	0.25	0.94	0.23	0	0.2	0.5	0.59	0.66	0.4	0.37	0.8	0.32	1.3	0.625	0.514	-0.2821	0.441871
hsa-miR-486-5p	77930.3	96483.3	153686	138918	66229.2	108997	74264.6	74638.8	23387.9	92470.8	43700.9	123551	156594	134838	108106	102389	73096.4	29020	127198	243828	90700.6	114232	0.3328	0.442585
hsa-miR-101-5p	0.36	0.47	0.27	0.21	2.32	0.43	0.78	0.62	0.19	0.46	1.97	0.8	0.7	0.59	1.43	0.59	1.03	0.62	0.85	0	0.611	0.858	0.4898	0.443977
hsa-miR-548h-3p	3.34	2.8	1.44	1.24	2.92	1.74	2.72	1	4.14	2.54	2.86	0.8	1.4	1.36	2.2	1	2.62	5.05	2.96	0	2.388	2.025	-0.2379	0.444068
hsa-miR-548z	3.34	2.8	1.44	1.24	2.92	1.74	2.72	1	4.14	2.54	2.86	0.8	1.4	1.36	2.2	1	2.62	5.05	2.96	0	2.388	2.025	-0.2379	0.44422
hsa-miR-6847-3p	0.36	0.09	0	0	0.34	0.11	0.29	0.12	0	0	0.18	0.1	0	0	0.33	0.1	0	0.09	0	0	0.131	0.08	-0.7115	0.445141
hsa-miR-6873-3p	2.62	2.62	2.06	2.26	1.63	1.41	1.16	1.62	0.47	0.81	1.61	1.91	0.8	0.78	2.19	2.08	1.31	0.62	0.95	2.42	1.666	1.467	-0.1835	0.445799
hsa-miR-127-5p	0.24	0.19	0.36	0.1	1.89	0.98	0.48	1.75	0.56	1.73	2.06	0.7	0.5	0.29	0.66	1.29	0.84	0.09	0.32	0.56	0.828	0.731	-0.1798	0.445928
hsa-miR-3130-3p	0	0.09	0.18	0.62	0.52	0.11	0.29	0	0.09	0.12	0.27	0	0.3	0.29	0.22	0.2	0.09	0	0.32	0	0.202	0.169	-0.2573	0.445937
hsa-miR-556-3p	0.12	0	0	0	0	0.11	0.19	0	0.38	0	0.36	0.1	0.1	0	0	0	0.19	0.8	0.11	0	0.08	0.166	1.0531	0.446959
hsa-miR-497-5p	0.36	0.37	0	0.1	0.86	1.3	0.58	0.75	0.19	1.04	4.2	0.4	0.2	1.37	1.1	0.4	0.75	0	0.95	0	0.555	0.937	0.7556	0.447604
hsa-miR-628-3p	10.85	5.89	6.73	5.76	6.28	4.66	8.53	6.11	1.13	6.24	10.82	2.01	4.12	7.22	7.13	12.78	4.85	2.48	4.98	2.6	6.218	5.899	-0.076	0.447905
hsa-miR-3691-3p	0.12	0.09	0.18	0.21	0.09	0.11	0	0.12	0	0.12	0	0.1	0.3	0	0.22	0.1	0	0	0.32	0.74	0.104	0.178	0.7753	0.448532
hsa-miR-4466	0.24	0	0.09	0	0.09	0	0	0	0	0	0	0.1	0.3	0.1	0	0.2	0	0.09	0	0	0.042	0.079	0.9115	0.448919
hsa-miR-196b-5p	50.09	61.18	90.75	55.79	43.18	54.17	76.24	63.39	56.06	81.88	60.42	46.23	57.74	61.5	62.07	39.74	53.67	71.01	101.55	27.5	63.273	58.143	-0.122	0.449392
hsa-miR-4722-5p	0	0	0	0	0	0.22	0	0.12	0	0	0	0	0	0	0	0.1	0.09	0	0.21	0.37	0.034	0.077	1.1793	0.452477
hsa-miR-576-5p	106.26	91.68	57.12	52.5	82.32	27.3	78.08	60.4	66.22	74.71	47.28	108.24	28.02	36.12	43.21	44	101.37	83.24	80.67	9.66	69.659	58.181	-0.2598	0.453286
hsa-miR-7-1-3p	4.65	4.3	2.06	1.54	1.89	1.52	3.68	1.87	5.36	1.85	6.53	1.41	0.7	0.78	1.1	1.78	3.92	7	1.59	0.19	2.872	2.5	-0.2001	0.453415
hsa-miR-6730-3p	0	0.09	0	0.31	0	0.22	0.1	0	0	0	0.27	0.2	0.2	0.39	0.11	0.1	0	0	0.11	0	0.072	0.138	0.9386	0.454344
hsa-miR-6516-5p	3.22	2.15	1.43	1.44	2.84	3.14	5.52	3.49	0.38	3.82	9.3	1.91	2.21	3.71	5.37	5.25	3.17	1.06	3.29	1.67	2.743	3.694	0.4294	0.45542
hsa-miR-211-5p	0.36	0.28	0.18	0.1	0	0.11	0.19	0.25	0.09	0.35	1.25	0	0.1	0.1	0.66	0.2	0.19	0	0.32	0.56	0.191	0.338	0.8235	0.455853
hsa-miR-6747-3p	6.32	6.55	5.47	9.57	3.78	4.88	4.36	3.37	0.38	3.82	2.32	6.73	4.22	4.49	5.59	6.64	2.8	0.35	5.51	24.16	4.85	6.281	0.373	0.455925
hsa-miR-3682-3p	0.83	0.19	0.27	0.31	0.34	0.43	0.1	0.12	0.28	0.23	0.45	0.1	0.5	0.1	0.11	0.1	0.28	0.27	0.21	0.37	0.31	0.249	-0.3161	0.456191
hsa-miR-551b-3p	0.12	0	0	0	0.17	0.11	0.19	0	0.09	0.23	0.09	0	0	0	0.11	0	0.19	0.09	0.11	0	0.091	0.059	-0.6252	0.45637
hsa-miR-6734-3p	0.95	1.31	1.88	1.54	1.55	1.95	2.42	1.75	0.09	0.58	2.06	0.7	1.71	1.07	1.75	0.59	1.68	0.27	2.44	0.19	1.402	1.246	-0.1702	0.456518
hsa-miR-142-3p	388.77	223.68	182.84	318.4	273.62	318.64	327.74	239.21	1459.33	200.88	451.75	144.92	224.44	312.97	497.44	670.32	240.36	1016.35	246.88	17.65	393.311	382.308	-0.0409	0.457888
hsa-miR-1273g-3p	0.48	0.56	0.72	0.31	1.29	1.08	1.36	0.75	0.19	0.58	1.34	0.6	0.8	1.17	1.32	1.98	0.65	0.18	1.06	0.74	0.732	0.984	0.4268	0.458932
hsa-miR-1262	0.12	0	0	0.31	0.17	0	0	0.12	0	0.12	0.27	0	0.1	0	0.11	0	0	0	0	0	0.084	0.048	-0.8074	0.459138
hsa-miR-342-5p	50.09	39.38	46	44.68	26.49	35.54	33.42	45.17	8.56	37.24	56.58	18.29	39.16	54.96	73.04	66.3	30.34	9.13	37.21	91.05	36.657	47.606	0.3771	0.459509
hsa-miR-500a-5p	7.4	7.86	6.64	3.5	12.74	16.04	16.08	10.98	9.6	14.8	11.98	8.84	16.88	12.3	10.52	4.96	5.22	9.92	11.24	1.48	10.564	9.334	-0.1786	0.460229
hsa-miR-365b-3p	8.82	8.8	3.22	1.24	4.64	6.5	5.04	5.98	4.9	7.4	8.4	3.82	4.22	3.12	2.86	0.4	6.16	10.46	5.3	0.74	5.654	4.548	-0.314	0.460828
hsa-miR-365a-3p	8.82	8.8	3.22	1.24	4.64	6.5	5.04	5.98	4.9	7.4	8.4	3.82	4.22	3.12	2.86	0.4	6.16	10.46	5.3	0.74	5.654	4.548	-0.314	0.460874
hsa-miR-548ag	2.39	1.31	0.72	0.93	0.52	0.65	1.07	1.87	0.38	1.27	3.22	1.61	1	0.29	1.86	2.18	1.59	0.89	0.53	1.67	1.111	1.484	0.4176	0.461495
hsa-miR-1284	9.78	7.95	5.56	4.12	8	5.09	4.46	5.74	1.22	5.32	6.7	7.94	4.72	6.15	4.72	3.47	5.41	4.34	4.03	1.3	5.724	4.878	-0.2307	0.461604
hsa-miR-1178-3p	0.48	0.28	0.45	0.21	0.26	0.43	0.1	0.37	0.09	0.35	0	0.3	0.3	0.88	0.22	0.3	0.19	0	0.42	1.67	0.302	0.428	0.5031	0.461946
hsa-miR-339-5p	110.07	66.23	60.44	42.82	175.73	279.64	198.7	262.92	35.55	269.57	660.46	110.55	199.14	178.74	332.17	143.6	237.18	56.03	211.47	13.57	150.167	214.291	0.513	0.462092
hsa-miR-219b-5p	0.48	0.28	0.18	0.21	0.43	0.11	0.29	0	0.56	0.46	0.54	0.6	0.4	0.29	0.33	0.4	0.93	0.44	0.32	0.19	0.3	0.444	0.5656	0.463771
hsa-miR-4690-3p	1.79	1.59	1.52	3.29	9.29	4.55	1.55	1.37	0.19	2.66	3.4	7.34	6.63	3.12	6.36	4.26	1.4	0.18	3.5	0.93	2.78	3.712	0.4171	0.466198
hsa-miR-449c-5p	0.6	0.65	0.36	0.41	0.17	1.52	0.29	0.62	0.09	0.12	0.18	0.7	2.31	1.37	0.99	0.5	0.09	0.09	0.64	0	0.483	0.687	0.5083	0.466278
hsa-miR-330-5p	23.02	27.78	25.38	23.99	37.42	31.42	39.82	31.57	11.66	24.75	37.18	25.53	50.41	39.44	43.87	54.21	21.28	8.95	31.69	36.61	27.681	34.917	0.335	0.466706
hsa-miR-452-5p	3.94	2.06	0.27	0.82	1.46	0.87	1.36	0.87	3.95	1.73	3.84	9.55	0.3	0.68	1.97	4.26	1.21	2.57	0.42	1.11	1.733	2.591	0.5802	0.467723
hsa-miR-572	0	0.09	0	0	0	0	0	0	0	0	0	0	0.3	0	0	0	0	0	0.11	0	0.009	0.041	2.1876	0.46993
hsa-miR-6832-3p	0.12	0	0.09	0	0.17	0.11	0	0	0	0	0	0.1	0	0	0.11	0	0	0	0	0	0.049	0.021	-1.2224	0.470786
hsa-miR-4755-3p	0.12	0.75	0.81	0.72	0.69	0.11	0.48	0.25	0	0.23	0.09	0.5	0.7	0.68	0.22	0.2	0.28	0.44	0.74	1.86	0.416	0.571	0.4569	0.471792
hsa-miR-454-3p	168.15	182.61	171.01	260.14	104.85	103.9	226.69	137.89	440.95	83.03	64.71	168.64	80.04	142.72	165.37	214.55	132.27	503.7	109.08	7.06	187.922	158.814	-0.2428	0.47226
hsa-miR-331-5p	13.71	19.55	18.02	15.85	23.14	39.44	33.23	24.83	5.17	32.15	28.6	20.9	41.17	31.73	33.78	22.6	29.87	12.59	31.06	21.18	22.509	27.348	0.2809	0.472641
hsa-miR-409-5p	4.41	2.53	5.29	1.54	7.74	5.96	2.23	9.61	2.45	13.76	15.37	4.12	3.31	2.64	2.85	5.55	9.8	4.43	1.17	0.93	5.552	5.017	-0.1462	0.473213
hsa-miR-20a-3p	0.72	0.28	0.27	0.21	0.86	0.33	0.29	0.62	1.13	0.69	2.5	0.4	0	0.29	0.33	0.3	0.93	3.1	0.11	0.19	0.54	0.815	0.5938	0.473851
hsa-miR-6816-3p	0.12	0	0.09	0	0	0	0	0	0	0	0.27	0	0.1	0.1	0	0	0	0	0.11	0	0.021	0.058	1.4657	0.474953
hsa-miR-24-1-5p	2.98	3.27	1.61	1.65	6.97	2.6	3.1	2.62	1.41	3.35	5.63	4.32	1.91	1.95	1.75	4.16	2.71	1.42	2.33	0.74	2.956	2.692	-0.135	0.47571
hsa-miR-4525	0	0.28	0.09	0.62	0	0.22	0.1	0	0	0.12	0	0.1	0.4	0.1	0.22	0	0	0	0.11	0	0.143	0.093	-0.6207	0.476637
hsa-miR-6892-5p	0	0	0	0.1	0	0.11	0	0	0	0	0.27	0	0	0.1	0.11	0.1	0	0	0	0	0.021	0.058	1.4657	0.476723
hsa-miR-6818-3p	3.46	3.46	2.33	1.75	2.84	1.08	1.55	1.25	1.13	2.31	1.34	3.32	1.41	1.95	1.32	2.77	1.96	1.15	1.17	2.04	2.116	1.843	-0.1993	0.477664
hsa-miR-6790-3p	0	0	0.09	0.1	0.09	0.22	0	0	0	0	0	0	0	0.1	0	0	0.09	0	0	0	0.05	0.019	-1.3959	0.477877
hsa-miR-3928-3p	4.41	3.55	4.57	4.32	4.04	3.58	3	3.99	0.94	2.78	6.61	2.71	4.32	6.83	5.48	4.86	3.64	1.95	4.77	3.53	3.518	4.47	0.3455	0.477893
hsa-miR-377-3p	0.24	0	0.09	0	0.17	0	0.1	0	0.38	0	0.36	0	0	0.1	0	0.1	0	0.18	0	0	0.098	0.074	-0.4053	0.478749
hsa-miR-5096	0.83	0.75	0.9	0.21	0.34	0.65	0.19	0.25	0.09	0.58	0.45	0.4	0.4	0.78	0.88	0.69	0.09	0.27	0.11	0	0.479	0.407	-0.235	0.478874
hsa-miR-4729	0.36	0.09	0	0	0	0	0	0	0	0	0	0	0	0	0	0	0	0.09	0	0	0.045	0.009	-2.3219	0.481312
hsa-miR-16-2-3p	390.92	143.04	245.79	138.15	121.28	84.51	73.63	223.49	17.21	239.96	1020.95	63.11	90.28	158.73	245.87	392.44	172.96	42.99	171.62	178.02	167.798	253.697	0.5964	0.481493
hsa-miR-4797-3p	0.36	0.19	0.54	0.82	0.52	0.43	0.39	0.12	0.38	0.23	0.72	0	0.4	0.29	0.11	0.69	0.19	0.35	0.11	0.74	0.398	0.36	-0.1448	0.481987
hsa-miR-3186-3p	0	0	0.09	0	0	0.22	0	0	0.09	0.12	0	0	0	0.1	0	0	0.09	0	0	0	0.052	0.019	-1.4525	0.482573
hsa-miR-3176	0.83	1.12	2.15	1.24	4.3	5.31	4.36	2.25	0.47	2.89	2.68	2.81	7.43	5.27	3.73	3.37	2.33	0.53	1.8	1.86	2.492	3.181	0.3522	0.482618
hsa-miR-155-5p	443.51	284.67	267.32	172.12	154.05	228.82	206.35	344.9	131.31	287.49	930.31	128.74	159.47	183.43	265.06	201.18	239.05	118.08	244.76	146.99	252.054	261.707	0.0542	0.484576
hsa-miR-3620-5p	0.72	0.28	0.54	0.1	0.26	1.95	0.48	0.62	0.66	0.23	1.16	0.3	0.4	0.68	1.43	1.29	0.19	0.98	0.85	0.93	0.584	0.821	0.4914	0.485368
hsa-miR-132-5p	7.87	7.3	4.04	5.25	7.4	8.67	9.4	5.37	2.35	7.63	10.46	5.33	6.83	9.37	5.81	15.56	7.84	2.3	5.41	12.82	6.528	8.173	0.3242	0.485488
hsa-miR-3691-5p	0.72	0.56	1.7	0.72	0.43	1.19	0.87	0.62	0.56	0.58	0.89	0.3	1.1	1.95	0.88	0.79	0.65	0.62	1.17	2.42	0.795	1.077	0.438	0.485594
hsa-miR-6806-3p	6.08	6.17	4.39	5.66	6.37	4.55	4.55	4.87	1.22	3.24	1.7	7.64	3.21	6.54	6.91	8.72	2.24	0.8	4.13	16.35	4.71	5.824	0.3063	0.485825
hsa-miR-204-3p	0	0	0	0.1	0	0	0.1	0	0	0	0	0	0	0	0.22	0.1	0.09	0	0	0.19	0.02	0.06	1.585	0.485828
hsa-miR-125b-2-3p	0.12	0.37	0.45	0.31	0.43	0.98	0.1	0	0	0.12	0.36	0	0.1	0.68	0.55	0.5	0.47	0.27	0.53	0.74	0.288	0.42	0.5443	0.486268
hsa-miR-30a-3p	28.86	23.76	22.06	20.9	19.18	23.4	20.34	23.96	4.61	41.98	45.94	22.91	20.29	18.45	32.13	35.68	25.2	8.51	17.6	58.53	22.905	28.524	0.3165	0.486848
hsa-miR-6733-5p	0.72	0.19	0.36	0.41	1.03	0.11	0	0.25	0.09	0	0.54	1.11	0.4	0.59	0.33	0.69	0.19	0.27	0.32	0	0.316	0.444	0.4906	0.487024
hsa-miR-1285-3p	44.72	56.41	54.88	36.75	40.35	41.28	49.4	30.19	22.95	31.68	34.68	38.7	49.1	32.8	27.97	34.48	38.65	44.59	38.06	29.36	40.861	36.839	-0.1495	0.48981
hsa-miR-1307-5p	0.95	2.06	0.99	1.96	5.68	9.97	5.23	4.12	1.79	6.94	9.65	2.21	5.82	3.12	5.04	6.44	4.57	5.23	4.24	4.27	3.969	5.059	0.3501	0.490019
hsa-miR-581	5.25	3.18	3.68	7.21	2.32	1.52	2.33	1.25	2.07	1.39	1.16	4.32	0.9	0.88	2.3	7.33	1.96	1.24	1.17	5.02	3.02	2.628	-0.2006	0.490672
hsa-miR-6877-5p	0.83	1.5	2.87	2.37	3.01	2.6	2.23	2.99	0.38	2.78	4.02	1.61	5.42	4	3.84	3.17	2.15	1.24	2.01	0.74	2.156	2.82	0.3873	0.491138
hsa-miR-584-3p	1.55	2.9	4.21	2.68	3.53	10.73	7.46	6.24	1.69	1.62	2.95	1.51	14.96	9.96	3.95	6.44	4.01	3.19	6.25	1.67	4.261	5.489	0.3654	0.49175
hsa-miR-4804-5p	0.12	0.09	0.63	0.51	0.17	0	0.19	0.37	0.19	0.12	0	0	0.3	0.1	0.44	0.4	0.28	0.18	0.11	0.19	0.239	0.2	-0.257	0.492683
hsa-miR-589-3p	0.83	0.19	0.18	0.21	0.26	0.43	1.07	0.62	0.09	0.46	0.89	0.2	0.5	0.29	0.55	0.4	0.28	0.18	0.42	0	0.434	0.371	-0.2263	0.492739
hsa-miR-6767-3p	0	0	0	0	0.09	0.33	0	0.12	0.19	0	0	0	0	0.2	0	0	0.09	0	0.11	0	0.073	0.04	-0.8679	0.493962
hsa-miR-186-5p	2389.29	2210.11	1176.33	1363.78	2828.38	1483.89	1590.93	1402.58	3217.02	1348.89	2942.97	2971.91	1359.91	1280.27	1607.13	1259.38	2049.52	2714.95	1248.92	310.51	1901.12	1774.55	-0.0994	0.494868
hsa-miR-582-3p	9.54	3.46	0.81	0.72	2.32	0.98	2.52	1.75	7.81	1.16	5.54	1.51	0.8	1.07	2.19	2.28	1.03	8.86	1.17	1.49	3.107	2.594	-0.2603	0.495631
hsa-miR-873-3p	0.24	0.47	0.09	0	0.09	0.76	0.29	0.37	0.19	0.12	1.97	0.2	0.1	0.29	0.33	0.5	0.47	0.09	0.11	0.37	0.262	0.443	0.7577	0.495969
hsa-miR-1296-5p	1.43	1.12	1.26	0.41	2.67	6.72	4.75	4.24	0.38	4.28	11.98	1.31	7.13	3.42	4.28	2.48	2.99	1.24	3.6	0.19	2.726	3.862	0.5026	0.496343
hsa-miR-3617-5p	0.6	0.37	0	0.21	0.09	0.65	0.1	0.25	0.09	0.46	1.07	0.5	0.3	0.1	0.22	0.99	0.65	0.18	0.21	0	0.282	0.422	0.5815	0.496858
hsa-miR-146b-5p	2830.06	1064.03	630.94	644.83	666.54	377.36	624.28	917.66	801.29	522.37	1578.52	790.84	223.54	458.61	673.67	1464.72	849.04	1020.79	551.11	646.85	907.936	825.769	-0.1369	0.497091
hsa-miR-6763-3p	0	0	0	0	0	0	0.29	0	0	0	0	0	0.1	0	0.11	0	0.47	0	0.11	0	0.029	0.079	1.4458	0.497872
hsa-miR-487b-3p	5.72	2.15	7.8	1.75	23.83	11.92	4.84	17.97	5.46	29.95	37.09	8.94	5.82	3.71	7.79	13.68	18.76	4.79	2.76	0.37	11.139	10.371	-0.1031	0.500011
hsa-miR-4639-5p	0.24	0.37	0.54	0.51	0.52	0.22	0.39	0.37	0.09	0.12	0.54	1.21	0.2	0.59	0.77	0.69	0.37	0.09	0.11	0.19	0.337	0.476	0.4982	0.500114
hsa-miR-4513	0.12	0	0	0	0	0	0.1	0	0	0	0	0	0	0	0	0	0	0	0	0	0.022	0	-1.1375	0.500178
hsa-miR-1225-3p	0	0	0	0	0	0	0	0	0	0	0	0	0.1	0	0	0.1	0	0	0	0	0	0.02	1	0.500178
hsa-miR-3184-3p	0	0	0	0	0	0	0	0	0	0	0	0	0.1	0.1	0	0	0	0	0	0	0	0.02	1	0.500178
hsa-miR-449b-3p	0	0.09	0	0	0.09	0	0	0	0	0	0	0	0	0	0	0	0	0	0	0	0.018	0	-0.848	0.500178
hsa-miR-1236-5p	0	0.09	0	0	0.09	0	0	0	0	0	0	0	0	0	0	0	0	0	0	0	0.018	0	-0.848	0.500178
hsa-miR-6749-5p	0	0	0	0	0	0	0	0	0	0	0.09	0	0	0.1	0	0	0	0	0	0	0	0.019	0.926	0.500178
hsa-miR-6833-5p	0	0	0	0	0	0	0	0	0	0	0.09	0	0	0.1	0.11	0	0	0	0	0	0	0.03	1.585	0.500178
hsa-miR-4710	0	0	0	0	0	0	0	0	0	0	0.09	0	0	0	0	0	0	0	0.11	0	0	0.02	1	0.500178
hsa-miR-7114-3p	0	0	0	0	0	0	0	0	0	0	0	0	0.1	0	0	0	0.09	0	0	0	0	0.019	0.926	0.500178
hsa-miR-6769a-3p	0	0	0	0	0	0	0	0	0	0	0.09	0	0	0.1	0	0	0	0	0	0	0	0.019	0.926	0.500178
hsa-miR-1233-5p	0	0	0	0	0	0	0	0	0	0	0	0	0	0.1	0.11	0	0	0	0	0	0	0.021	1.0704	0.500178
hsa-miR-765	0	0	0	0	0	0	0	0	0	0	0.09	0	0.1	0	0	0.1	0	0	0	0	0	0.029	1.5361	0.500178
hsa-miR-4722-3p	0	0	0	0	0	0	0	0	0	0	0	0	0	0.1	0	0	0.09	0	0	0	0	0.019	0.926	0.500178
hsa-miR-376b-5p	0	0	0	0	0.09	0.11	0	0	0	0	0	0	0	0	0	0	0	0	0	0	0.02	0	-1	0.500178
hsa-miR-4632-5p	0	0	0	0	0	0	0	0	0	0	0.09	0	0	0.1	0.11	0	0	0	0	0	0	0.03	1.585	0.500178
hsa-miR-655-5p	0	0	0	0	0	0	0	0	0	0	0.09	0	0	0	0	0	0.09	0	0	0	0	0.018	0.848	0.500178
hsa-miR-187-5p	0	0	0	0	0	0	0	0	0	0	0	0	0	0	0.11	0	0	0	0.11	0	0	0.022	1.1375	0.500178
hsa-miR-4740-5p	0.12	0	0	0	0	0	0.1	0	0	0	0	0	0	0	0	0	0	0	0	0	0.022	0	-1.1375	0.500178
hsa-miR-6797-5p	0	0	0	0	0	0	0	0	0	0	0	0	0	0	0.11	0.1	0	0	0	0	0	0.021	1.0704	0.500178
hsa-miR-6840-3p	0	0	0	0	0	0	0	0	0	0	0	0	0	0	0	0	0.09	0	0.11	0	0	0.02	1	0.500178
hsa-miR-4682	0	0	0	0	0	0	0	0	0	0	0	0	0.1	0	0	0	0.09	0	0	0	0	0.019	0.926	0.500178
hsa-miR-4671-5p	0	0	0	0	0	0	0	0	0	0	0	0	0.1	0	0	0	0.09	0	0	0	0	0.019	0.926	0.500178
hsa-miR-7107-3p	0	0	0	0	0	0	0	0	0	0	0.09	0	0	0.1	0	0	0	0	0	0	0	0.019	0.926	0.500178
hsa-miR-6505-5p	0.36	0.47	0.36	0.51	0.34	0.22	0.29	0.87	0.28	0	0.54	0.2	0.4	0.39	0.33	0.4	0.28	0.18	0.21	0.37	0.37	0.33	-0.1651	0.500371
hsa-miR-152-5p	0.48	0.19	0.09	0.1	0.17	0.33	0.58	0.37	0.28	0.23	1.79	0.2	0.1	0	0.22	0.4	0.28	0.18	0.53	0.74	0.282	0.444	0.6549	0.500761
hsa-miR-3688-3p	7.99	4.77	5.74	2.37	5.76	3.58	2.71	3.37	10.63	3.82	6.08	5.73	3.31	4.1	3.4	3.47	6.25	25.89	5.19	1.67	5.074	6.509	0.3593	0.500786
hsa-miR-99b-5p	760.37	360.54	150.56	95.94	156.98	200.76	206.25	380.47	39.22	209.2	682.89	288.44	81.24	95.76	384.05	447.84	234.66	41.31	129.22	881.36	256.029	326.677	0.3516	0.502285
hsa-miR-6758-3p	0.36	0.19	0.27	0.31	0.26	0.11	0.39	0.25	0.09	0	0.36	0.4	0.2	0.1	0	0	0.09	0.09	0.11	0.37	0.223	0.172	-0.3746	0.502346
hsa-miR-874-3p	5.13	3.84	4.21	2.16	6.19	12.46	9.11	18.22	1.32	12.72	25.56	6.73	9.14	8.98	15.79	10.8	10.08	3.01	11.45	0.56	7.536	10.21	0.4381	0.50252
hsa-miR-889-3p	3.7	1.03	2.42	1.34	6.8	1.41	1.16	2.5	3.1	1.73	8.58	4.12	0.9	1.07	1.32	9.91	5.04	4.34	1.06	0.37	2.519	3.671	0.5433	0.502697
hsa-miR-7846-3p	0	0	0.09	0	0	0	0	0	0	0.12	0	0	0	0	0	0	0	0	0	0	0.021	0	-1.0704	0.503255
hsa-miR-4743-3p	0	0	0.09	0	0	0	0	0	0	0.12	0	0	0	0	0	0	0	0	0	0	0.021	0	-1.0704	0.503378
hsa-miR-374a-3p	10.14	7.2	11.57	22.13	12.39	17.34	13.56	6.61	41.76	5.78	9.39	7.24	10.14	15.52	16.89	34.69	5.6	97.07	9.65	3.9	14.848	21.009	0.5007	0.503412
hsa-miR-3659	0	0	0	0	0	0	0	0	0	0	0	0.1	0	0	0	0	0.09	0	0	0	0	0.019	0.926	0.503865
hsa-miR-6834-3p	0	0.09	0	0	0	0	0	0	0	0.12	0	0	0	0	0	0	0	0	0	0	0.021	0	-1.0704	0.504159
hsa-miR-7852-3p	0	0	0	0	0	0	0	0	0	0	0	0	0	0	0	0.1	0	0.09	0	0	0	0.019	0.926	0.504174
hsa-miR-888-5p	0	0	0	0	0	0	0	0	0	0	0	0	0	0	0	0	0.09	0.09	0	0	0	0.018	0.848	0.504624
hsa-miR-5003-5p	0	0	0	0	0	0	0	0	0	0	0	0	0	0	0.11	0	0	0.09	0	0	0	0.02	1	0.505069
hsa-miR-4786-3p	0	0	0	0	0	0	0	0	0	0	0	0.1	0.1	0	0	0	0	0	0	0	0	0.02	1	0.505218
hsa-miR-495-5p	0	0	0	0	0	0	0	0	0	0	0	0	0	0	0.11	0	0	0.09	0	0	0	0.02	1	0.505256
hsa-miR-4661-3p	0	0	0	0	0	0	0	0.12	0	0.12	0	0	0	0	0	0	0	0	0	0	0.024	0	-1.263	0.50526
hsa-miR-32-5p	44.96	32.18	16.59	30.99	22.97	9.43	22.38	13.48	272.11	5.55	17.34	12.46	4.62	11.81	13.16	25.17	19.32	260.98	7.53	1.49	47.064	37.388	-0.332	0.505478
hsa-miR-190a-3p	0	0	0	0	0	0	0.29	0	0	0	0	0	0	0	0	0	0	0.62	0	0	0.029	0.062	1.0962	0.505606
hsa-miR-3200-3p	10.73	13.38	13.45	7.1	27.1	24.92	22.67	28.58	6.49	30.07	14.75	16.48	15.36	20.01	25	7.63	15.4	16.22	23.11	4.09	18.449	15.805	-0.2232	0.506141
hsa-miR-642b-3p	0	0	0	0	0	0	0	0	0	0	0	0.1	0	0	0	0	0	0	0.11	0	0	0.021	1.0704	0.506437
hsa-miR-216a-5p	0	0	0	0	0	0	0	0	0	0	0.18	0	0	0	0.11	0	0	0	0	0	0	0.029	1.5361	0.506488
hsa-miR-3150b-5p	0.12	0.09	0	0	0.43	0.33	0	0.5	0	0.23	0.27	0.2	0.8	0.1	0.22	0.1	0.19	0	0.64	0	0.17	0.252	0.5679	0.507233
hsa-miR-374c-5p	0.48	1.59	0.81	0.72	4.99	4.77	4.94	3.24	4.23	0.46	5.01	1.91	5.32	0.68	1.54	0.3	6.16	12.5	2.01	0	2.623	3.543	0.4338	0.507303
hsa-miR-5586-5p	0	0	0	0	0	0	0	0	0	0	0	0	0	0	0	0	0	0.09	0.11	0	0	0.02	1	0.507428
hsa-miR-34c-3p	0	0	0	0.1	0	0	0	0	0	0.12	0	0	0	0	0	0	0	0	0	0	0.022	0	-1.1375	0.508721
hsa-miR-1913	0	0	0	0.1	0	0	0	0	0	0.12	0	0	0	0	0	0	0	0	0	0	0.022	0	-1.1375	0.508746
hsa-miR-4765	0	0	0.09	0.31	0	0	0.1	0.12	0.19	0	0	0.1	0.1	0.1	0	0	0	0	0	0.19	0.081	0.049	-0.7251	0.510107
hsa-miR-6514-3p	0.48	0.56	0.18	0.41	0.43	0.76	1.26	0.5	0	0.93	0.89	0.6	0.6	0.98	0.88	0.99	0.47	0.18	1.06	0.56	0.551	0.721	0.3879	0.510494
hsa-miR-5581-3p	0.83	0.56	0.45	0	1.03	0.54	0.68	0.12	0.19	0.93	0.63	0.5	0.2	0.49	0.33	0.2	0.84	0.53	0.53	0	0.533	0.425	-0.3267	0.511399
hsa-miR-299-3p	0	0	0	0	0.09	0	0	0	0.19	0.12	0.18	0	0	0.1	0.11	0.1	0	0.27	0	0.19	0.04	0.095	1.2479	0.512219
hsa-miR-675-3p	0	0	0	0	0	0	0	0	0	0	0.18	0.1	0	0	0	0	0	0	0	0	0	0.028	1.4854	0.51283
hsa-miR-6506-5p	0	0.09	0.09	0.1	0.09	0.11	0.19	0	0.19	0.12	0	0.1	0.1	0.1	0.22	0	0.09	0	0	0.19	0.098	0.08	-0.2928	0.513438
hsa-miR-1251-5p	0	0	0	0	0.09	0	0	0	0.09	0	0	0	0	0	0	0	0	0	0	0	0.018	0	-0.848	0.514096
hsa-miR-574-5p	37.09	36.86	57.3	37.68	23.48	69.02	24.12	17.47	4.8	13.07	45.41	17.39	88.57	107.58	59.22	67.39	15.31	5.05	18.87	16.91	32.089	44.17	0.461	0.516821
hsa-miR-6857-5p	0	0	0.09	0	0	0	0	0	0.09	0	0	0	0	0	0	0	0	0	0	0	0.018	0	-0.848	0.516972
hsa-miR-2681-3p	0.12	0	0	0	0	0	0	0	0.09	0	0	0	0	0	0	0	0	0	0	0	0.021	0	-1.0704	0.517107
hsa-miR-363-5p	5.84	8.33	8.7	7.82	8.09	6.72	8.62	6.61	2.54	4.63	3.4	6.13	6.93	6.83	7.9	10.5	6.53	3.55	5.51	24.53	6.79	8.181	0.2689	0.51859
hsa-miR-3675-5p	0.36	0.37	0.45	0.21	0.34	0.43	0.19	0.25	0.09	0.35	0.36	0.5	0.3	0.98	0.22	0.2	0.47	0.18	0.64	0.19	0.304	0.404	0.4103	0.519474
hsa-miR-3667-3p	0.24	0.47	0	0	0.34	0.65	0.29	0.37	0	1.39	1.79	0.2	0.9	0.39	0.44	0	0.84	0.35	0.53	0	0.375	0.544	0.5367	0.519593
hsa-miR-766-3p	17.41	11.13	16.86	6.79	18.75	25.35	23.35	35.69	3.01	27.29	71.78	10.75	17.47	22.16	37.29	28.44	24.83	5.94	26.61	5.95	18.563	25.122	0.4365	0.519696
hsa-miR-6738-3p	0.24	0.28	0.27	0.1	0.52	0.54	0.39	0.37	0.09	0.46	0.27	0.2	0.3	0.39	0.44	0.1	0.09	0	0.53	0.37	0.326	0.269	-0.2773	0.519891
hsa-miR-4654	0	0	0	0	0	0.11	0.1	0.37	0	0	0.09	0.1	0	0	0.11	0.1	0	0	0.21	0.37	0.058	0.098	0.7567	0.520443
hsa-miR-1269b	0	0	0	0	0	0	0	0	0	0	0.09	0	0	0	0	0	0	0	0	0.19	0	0.028	1.4854	0.520902
hsa-miR-1229-3p	2.03	1.68	2.06	1.85	1.72	2.49	2.42	4.12	0.47	2.89	3.75	1.01	3.11	2.54	2.52	2.18	2.15	0.35	2.44	0.74	2.173	2.079	-0.0638	0.521615
hsa-miR-4493	0	0	0	0	0	0	0	0	0	0	0.09	0	0	0	0	0.2	0	0	0	0	0	0.029	1.5361	0.521836
hsa-miR-3141	0	0	0	0	0	0	0	0	0	0	0.09	0	0	0	0	0.2	0	0	0	0	0	0.029	1.5361	0.52189
hsa-miR-6746-5p	0	0	0	0	0	0	0	0	0	0	0	0	0	0	0	0.1	0	0	0	0.19	0	0.029	1.5361	0.522105
hsa-miR-10a-3p	1.67	0.37	0.9	0.31	0.43	0.76	1.55	1.37	0.56	0.93	2.77	0.8	0.2	0.39	0.66	1.09	1.31	0.44	0.74	0	0.885	0.84	-0.0753	0.523806
hsa-miR-3685	0.12	0	0	0.21	0.09	0.11	0.1	0	0.09	0	0.09	0.1	0	0.1	0	0.2	0.19	0.09	0.11	0.37	0.072	0.125	0.7959	0.523868
hsa-miR-6856-3p	0	0	0	0	0	0	0	0	0	0	0	0	0.1	0	0	0	0	0	0	0.19	0	0.029	1.5361	0.524062
hsa-miR-377-5p	0.95	0.28	0.99	0	1.72	1.52	0.87	2.37	0.09	1.97	3.04	0.9	0.6	0.78	0.88	2.08	0.75	0	0.53	0	1.076	0.956	-0.1706	0.524184
hsa-miR-3161	0	0.94	0	0	0	0	0	0	0.47	0.35	4.11	0.4	0	0.39	0	0	0	0	0.42	0.19	0.176	0.551	1.6465	0.524416
hsa-miR-4449	0.36	0.19	0.45	0.21	0.26	0.43	0.19	0.12	0	0.35	0.18	0.4	0.2	0.2	0.22	0.3	0	0	0.32	0.19	0.256	0.201	-0.3489	0.524612
hsa-miR-548at-5p	0.72	0.75	1.26	1.13	0.43	1.41	1.55	1.25	1.32	1.73	0.54	1.31	1.61	1.07	0.77	0.4	1.49	0.98	2.01	0	1.155	1.018	-0.1822	0.525587
hsa-miR-3065-3p	0	0	0.09	0	0	0.22	0	0.25	0.09	0.12	0.8	0.2	0	0	0.11	0	0	0.27	0.11	0	0.077	0.149	0.9524	0.525587
hsa-miR-500b-3p	0.12	0.37	0.54	0.1	0.6	0.22	0.48	0.37	0	0.46	0.54	0.4	0.3	0.59	0.44	0.5	0.19	0.27	0.64	0.37	0.326	0.424	0.3792	0.525755
hsa-miR-625-3p	139.29	116.28	43.31	49.21	101.15	36.95	65.01	62.89	26.43	55.39	192.44	161	46.39	27.53	74.02	78.39	117.33	24.56	59.04	95.7	69.591	87.64	0.3327	0.526343
hsa-miR-485-3p	20.87	7.02	18.38	8.85	33.37	26.87	10.56	48.67	3.2	65.22	54.79	19.1	15.67	8	25.99	31.22	41.35	2.75	8.8	14.87	24.301	22.254	-0.127	0.527753
hsa-miR-187-3p	0.12	0.28	0.18	0.21	0.26	0.76	0.48	0.12	0	0.23	1.25	0.2	0.4	0.78	0.55	0	0.28	0	0.32	0.19	0.264	0.397	0.5886	0.528119
hsa-miR-106b-3p	2543.72	3086.86	3319.97	2106.51	4586.71	5440.43	3358.37	3889.03	906.26	3269.87	4695.7	2763.37	5422.46	4941.17	4812.19	3314.54	3774.95	2540.75	3887.63	2416.63	3250.77	3856.94	0.2467	0.528154
hsa-miR-3192-5p	0.48	0.28	0.45	0.51	0.77	0.33	0.19	0.25	0.28	0	0.36	0.2	0.2	1.27	0	0.5	0.09	0	0.21	0.19	0.354	0.302	-0.2292	0.528427
hsa-miR-410-3p	1.91	1.03	0.99	0.31	8.43	3.58	1.84	6.24	2.92	9.83	16.71	2.61	0.8	1.17	2.08	2.58	6.44	2.3	0.95	0.19	3.708	3.583	-0.0495	0.530673
hsa-miR-296-5p	2.98	5.15	6.1	2.16	9.46	15.6	11.24	14.72	1.32	14.46	16	3.72	14.66	17.18	15.46	6.14	12.6	6.21	14.63	0.37	8.319	10.697	0.3627	0.531052
hsa-miR-4446-5p	0.12	0	0.09	0	0.09	0.22	0.39	0.5	0	0.35	0.18	0.2	0.3	0.29	0.66	0.2	0.09	0	0.21	0.37	0.176	0.25	0.5064	0.53125
hsa-miR-4507	0	0	0.09	0.1	0.09	0.43	0.19	0.25	0.19	0.12	0.36	0.1	0	0.2	0.55	0.3	0.09	0.53	0.11	0	0.146	0.224	0.6175	0.532268
hsa-miR-6865-3p	0	0	0	0	0	0.33	0	0.12	0.09	0	0	0.1	0	0	0	0	0	0	0.11	0	0.054	0.021	-1.3626	0.532327
hsa-miR-126-3p	14117.8	11128.5	5214.5	9591.57	9699.59	3671.05	8023.91	5319.18	12275.2	4217.35	14204.1	10244.9	2799.45	4160.02	6925.54	21410.8	9675.96	7417.03	3583.62	3985.91	8325.87	8440.73	0.0198	0.533003
hsa-miR-3183	0	0	0	0	0.09	0.22	0	0.25	0	0	0.63	0	0	0.1	0.33	0.1	0.09	0	0	0	0.056	0.125	1.1584	0.53389
hsa-miR-656-3p	0.6	0.09	0.36	0.21	0.34	0.33	0	0.5	0.56	0.35	0.54	0.3	0	0.1	0	0	1.12	0.53	0	0	0.334	0.259	-0.3669	0.535842
hsa-miR-3653-5p	0.83	0.56	0.63	1.13	0.26	0.11	0.48	1.75	0.09	0.35	1.7	0.2	0.4	0.88	0.88	0.5	0.37	0.09	0.42	0.37	0.619	0.581	-0.0914	0.536057
hsa-let-7b-3p	15.03	7.2	5.11	2.06	10.06	6.07	6.88	9.86	1.98	11.68	32.89	5.93	6.03	3.32	6.36	4.56	10.08	5.05	12.08	11.52	7.593	9.782	0.3655	0.536177
hsa-miR-4433b-5p	352.52	112.82	138.9	80.6	142.87	437.6	226.11	580.75	36.59	486.17	940.77	387.53	158.46	143.6	433.39	431.39	256.6	77.48	432.17	119.48	259.493	338.087	0.3817	0.537824
hsa-miR-500b-5p	3.34	5.62	4.3	2.06	11.18	13	12.2	8.98	7.52	12.26	9.12	7.04	12.26	9.76	9.22	2.38	4.3	8.16	8.48	1.12	8.046	7.184	-0.1635	0.538203
hsa-miR-195-3p	0.36	0	0.09	0	0.34	0.22	0.58	0.62	0	0.46	0.63	0.6	0.1	0.1	0.33	0.79	0	0	0.21	0.93	0.267	0.369	0.4668	0.538576
hsa-miR-885-5p	0	0.09	0	0.1	0	0.11	0.1	0.25	0	0	0	0	0	0	0.11	0.2	0	0	0	0	0.065	0.031	-1.0682	0.538991
hsa-miR-4723-3p	0	0	0.18	0.31	0	0.22	0.29	0.12	0	0.23	0.09	0.1	0.3	0.1	0.44	0.2	0.19	0.09	0.32	0.19	0.135	0.202	0.5814	0.539442
hsa-miR-6807-5p	0.12	0.19	0.09	0	0.17	0.33	0.29	0	0	0.12	0.09	0.1	0.1	0.1	0.22	0.1	0.09	0	0.11	0	0.131	0.091	-0.5256	0.539747
hsa-miR-6847-5p	0.12	0.28	0.09	0	0.09	0.33	0.19	0.25	0	0	0.36	0	0.1	0.1	0.22	0.4	0.19	0.09	0.32	0.37	0.135	0.215	0.6714	0.540028
hsa-miR-378a-3p	1091.19	1274.99	848.13	763.11	1297.72	1217.9	736.17	750.2	499.27	730.76	1742.28	1487.81	1171.32	1077.32	952.11	1040.56	786.32	539.6	868.79	1434.56	920.944	1110.07	0.2695	0.5404
hsa-miR-4646-3p	1.07	0.94	1.79	1.85	2.15	2.82	1.45	1.87	0.09	1.39	1.43	0.6	2.91	1.27	1.21	1.88	1.68	0.35	1.91	0.74	1.542	1.398	-0.1414	0.540541
hsa-miR-2278	0.48	0.47	0.09	0.31	0.34	0.33	0.58	0.12	0	0.58	0.63	0.3	0.4	0.49	0.44	0.3	0.56	0.44	0.74	0	0.33	0.43	0.3819	0.541814
hsa-miR-3913-5p	11.93	13.85	8.07	19.15	9.81	4.88	7.17	6.61	5.08	4.05	5.45	9.65	4.02	6.44	3.95	13.68	5.79	6.21	3.92	20.25	9.06	7.936	-0.1911	0.542099
hsa-miR-125a-5p	720.9	318.82	237.9	110.15	150.27	306.29	306.72	813.47	54.93	420.49	931.65	210.95	123.22	147.01	609.63	312.86	428.25	62.05	331.05	143.64	343.994	330.031	-0.0598	0.542563
hsa-miR-4745-3p	0.36	0.28	0.45	1.03	1.2	1.3	0.97	1.5	0.28	0.69	0.36	0.3	1.1	1.46	1.32	0.79	0.37	0.09	1.27	0	0.806	0.706	-0.1911	0.542924
hsa-miR-200b-5p	0.72	0	0.27	0.62	0.26	0.11	0	0.37	0	0.35	0.63	0	0	0.39	0.55	0.2	0.09	0	0.21	0.19	0.27	0.226	-0.2566	0.544996
hsa-miR-6737-3p	0	0.19	0	0	0	0	0.19	0.12	0	0.12	0.09	0	0.3	0.29	0.22	0	0.28	0	0	0	0.062	0.118	0.9284	0.545412
hsa-miR-363-3p	6017.52	7799.8	4997.13	6326.23	11147.6	8899.77	12371.5	7693.58	4505.44	9531.95	5217.8	10739.8	9156.53	7530.9	7301.91	7774.8	8123.86	4367.26	8064.23	4499.72	7929.05	7277.68	-0.1237	0.545593
hsa-miR-25-3p	26121.6	31246.3	26720.4	22969.7	27986.3	21446	22397.3	19233.6	10130.9	20474.3	18447.1	30557.7	23331.5	27395.8	20274.8	22492.5	22447.6	12789	23038.2	12592.3	22872.6	21336.7	-0.1003	0.545909
hsa-miR-133a-3p	2.39	4.58	3.95	0.93	6.8	28.71	2.52	7.61	1.32	11.22	23.69	2.81	10.04	6.44	40.8	8.82	4.57	0.62	6.15	0.74	7.003	10.468	0.5799	0.546855
hsa-miR-455-3p	0	0.19	0.09	0.21	0	0.76	0	0	0.09	0	0.18	0	0.1	0.2	0.11	0.3	0	0	0.21	0	0.134	0.11	-0.2847	0.546931
hsa-miR-4709-5p	0.36	0	0.09	0	0.43	0.43	0.29	0.12	0	0.12	0.54	0.4	0.1	0.1	0.22	0.3	0.19	0	0.64	0.19	0.184	0.268	0.5425	0.547964
hsa-miR-4731-5p	0.12	0.19	0.18	0	0.09	0	0.19	0.12	0	0.35	0.09	0	0.3	0.1	0.11	0.1	0.09	0	0.11	0	0.124	0.09	-0.4623	0.551004
hsa-miR-4448	0.95	2.34	2.6	1.75	2.24	3.14	1.55	1	0.28	1.04	2.41	0.5	1.91	4.49	2.96	3.37	2.71	0.71	1.27	1.86	1.689	2.219	0.3937	0.551208
hsa-miR-378d	16.7	23.2	14.44	10.71	56.68	51.57	28.58	18.22	8.65	19.66	65.61	21.91	43.38	26.75	24.24	31.32	31.18	25.97	17.49	16.17	24.841	30.402	0.2914	0.552571
hsa-miR-6770-5p	0	0.47	0.27	0.1	0.09	0.22	0.29	0.25	0.09	0.23	0.63	0.4	0.2	0.29	0.33	0.2	0.56	0.18	0.11	0	0.201	0.29	0.5289	0.553156
hsa-miR-4429	1.31	0.56	1.52	2.47	1.55	1.41	0.78	1.25	0.85	1.16	0.72	1.11	1	1.95	1.54	1.78	1.59	0.53	0.74	1.11	1.286	1.207	-0.0915	0.55316
hsa-miR-7854-3p	1.19	0.47	0.9	1.13	1.55	0.22	0.87	0.87	0.09	2.2	0.27	0.8	0.9	1.37	1.54	1.68	0.19	0.18	1.06	0.19	0.949	0.818	-0.2143	0.554715
hsa-miR-550a-3-5p	64.87	68.29	70.3	45.5	63.91	85.05	62.29	62.39	17.59	62.68	33.96	49.85	165.29	90.2	76.87	92.17	52.84	25.71	69.01	64.48	60.287	72.038	0.2569	0.556528
hsa-miR-125b-1-3p	0.12	0.28	0	0.21	0	0.11	0.39	0.12	0	0.35	0.09	0.2	0	0.1	0	0	0	0	0.11	0.56	0.158	0.106	-0.5759	0.557158
hsa-miR-7110-3p	0.24	1.59	0.09	0.31	1.03	0.98	1.07	0.87	0	0.46	2.06	0.1	0.9	0.98	0.99	1.98	0.65	0	1.17	0.74	0.664	0.957	0.5273	0.55927
hsa-miR-29b-1-5p	0.83	0.19	0.54	0.31	0.43	0.43	0.87	0.37	0.19	2.08	1.16	0	0.7	0.88	0.99	0.3	0.56	0.18	0.95	0	0.624	0.572	-0.1255	0.55933
hsa-miR-345-5p	44.12	35.46	37.48	42.41	165.75	159.92	74.89	95.83	23.99	134.15	192.89	67.13	169.71	125.93	165.59	56.29	112.38	31.47	103.46	15.61	81.4	104.046	0.3541	0.562351
hsa-miR-3130-5p	0.12	0.37	0.81	0	0.17	0.87	0.1	0	0	0.93	0.18	0	0	0	0.11	0	1.49	0.44	0	0	0.337	0.222	-0.6022	0.56307
hsa-miR-5706	0.12	0	0.09	0	0	0	0.1	0	0	0	0.18	0	0.1	0	0	0.1	0	0.27	0	0	0.031	0.065	1.0682	0.564145
hsa-miR-181b-2-3p	0.12	0	0.09	0.1	0.17	0.11	0.1	0.12	0.19	0	0.45	0	0	0	0	0	0.09	0.27	0	0	0.1	0.081	-0.304	0.564657
hsa-miR-7976	48.3	40.69	55.78	30.68	77.16	64.14	54.06	48.79	11.48	50.88	68.56	58.39	82.85	61.4	65.03	37.36	64.41	37.94	66.89	20.44	48.196	56.327	0.2249	0.564907
hsa-miR-382-3p	1.43	0.19	1.26	0.31	1.89	0.65	0.29	1.75	1.79	1.04	5.36	0.7	0.2	0.2	0.88	1.78	5.13	2.3	0.21	0	1.06	1.676	0.661	0.565229
hsa-miR-92a-1-5p	3.34	1.59	1.79	0.82	2.06	2.82	3.97	5.37	0.38	5.2	7.24	1.21	4.42	4.3	5.15	2.58	2.8	0.44	4.13	2.6	2.734	3.487	0.351	0.565895
hsa-miR-23b-3p	287.41	230.13	225.35	128.68	326.34	386.9	437.69	497.52	181.91	505.6	1049.73	175.88	269.33	363.43	435.37	402.75	560.61	396.26	420.62	60.02	320.753	413.4	0.3661	0.566243
hsa-miR-550a-5p	47.7	49.86	48.96	34.38	36.3	52.44	34.2	35.31	11.38	39.78	19.75	32.16	112.37	57.3	51.1	59.06	29.03	17.11	42.72	47.94	39.031	46.854	0.2636	0.566429
hsa-miR-95-3p	6.32	3.74	2.6	1.85	2.75	4.55	1.55	6.99	1.69	4.39	10.9	1.91	2.31	3.22	4.39	6.94	7.09	3.37	5.51	1.3	3.643	4.694	0.3657	0.567806
hsa-miR-4717-3p	0.12	0.19	0.45	0.21	0.43	0	0.1	0.12	0.09	0.12	0.09	0.1	0.4	0.2	0	0.1	0.09	0.18	0.32	0	0.183	0.148	-0.3062	0.570329
hsa-miR-1268b	0.95	0.47	0.36	0.51	0.86	4.33	0.48	0.75	0.38	0.81	5.01	0.3	1.51	0.39	1.86	1.88	1.4	0.53	0.85	0.56	0.99	1.429	0.5295	0.570392
hsa-miR-133b	0.36	0.37	0	0	0.69	2.6	0.29	0.75	0	1.04	2.95	0.3	1.21	0.39	2.63	0.79	0.47	0	0.74	0	0.61	0.948	0.6361	0.570951
hsa-miR-15a-3p	0	0	0	0	0.17	0.22	0.1	0.37	0	0	0.09	0.1	0.3	0.2	0.11	0.1	0	0.18	0	0.19	0.086	0.127	0.5624	0.572048
hsa-miR-6877-3p	0	0	0	0	0	0	0	0	0	0	0	0	0	0	0	0.2	0	0	0	0	0	0.02	1	0.573769
hsa-miR-548as-5p	0.36	0.09	0.09	0.21	0.09	0.22	0.48	0.12	0.19	0.81	0.18	0.1	0	0.29	0.11	0.2	0.28	0.27	0.53	0.19	0.266	0.215	-0.3071	0.573779
hsa-let-7d-5p	5301.27	5841.99	6518.89	6091.01	5392.85	9503.68	6625.09	7297.51	2434.35	7252.81	7075.47	3655.92	9149.9	8407.03	8368.4	4833.27	6663.34	3586	6708.78	2140.87	6225.94	6058.9	-0.0392	0.574325
hsa-miR-1306-3p	8.11	6.17	10.04	10.81	7.66	10.18	14.43	10.61	0.75	8.56	7.33	6.53	13.66	12.3	12.06	17.44	6.44	1.6	10.81	17.84	8.732	10.601	0.2798	0.574682
hsa-miR-193b-3p	0	0.65	0	0.1	0.95	0.76	0.97	1	0.09	0.46	1.34	0.2	0.5	0.78	0.44	0.2	0.47	0.09	0.42	0	0.498	0.444	-0.1656	0.574892
hsa-miR-6501-3p	0	0	0.09	0.1	0	0.54	0	0.12	0	0.23	0.36	0.1	0.6	0.29	0	0	0.09	0	0.21	0	0.108	0.165	0.6114	0.575546
hsa-miR-324-5p	15.98	26.01	28.87	14.62	50.58	57.31	49.41	50.16	26.24	41.86	38.97	21.71	44.19	47.05	45.4	31.32	35.38	36.26	33.07	4.09	36.104	33.744	-0.0975	0.576037
hsa-miR-5189-3p	0	2.53	4.12	2.68	6.28	0	2.03	0.12	0.75	6.01	0	2.41	3.21	0	4.28	0.1	4.48	1.33	2.86	0	2.452	1.867	-0.3932	0.576282
hsa-miR-584-5p	283.83	318.63	327.22	260.65	239.04	332.73	330.64	305.1	95.38	169.54	364.33	186.43	369.35	407.36	294.78	629.1	288.99	150.44	246.56	313.11	266.276	325.045	0.2877	0.576325
hsa-miR-431-5p	3.34	1.31	4.75	0.51	10.06	8.78	2.91	7.86	2.63	9.71	16.18	3.42	3.62	2.34	4.39	9.32	9.05	0.89	1.7	0.93	5.186	5.184	-0.0006	0.577732
hsa-miR-16-5p	7202.56	6761.87	5155.05	6422.28	7158.08	4172.25	7753.04	5971.81	15875.1	5439.73	6327.15	5052.48	2249.64	4895.29	5765.29	5982.15	10010.2	20023.5	4632.09	327.8	7191.18	6526.56	-0.1399	0.577783
hsa-miR-151b	128.79	81.76	102.41	97.69	176.84	176.06	287.24	164.84	36.4	152.65	248.04	96.08	117.4	119.78	149.36	117.64	213.29	78.9	140.77	64.48	140.468	134.574	-0.0618	0.578428
hsa-miR-944	0.24	0	0	0.21	0.17	0	0	0	0	0	0.09	0	0	0	0	0.2	0	0.09	0	0	0.062	0.038	-0.7063	0.578735
hsa-miR-4738-3p	0.83	1.22	0.9	1.96	1.29	0.98	1.36	1.37	0.28	0.93	1.34	0.9	0.8	1.27	1.54	0.69	0.65	0.53	0.95	1.67	1.112	1.034	-0.1049	0.580052
hsa-miR-222-3p	1247.06	815.66	469.8	514.92	753.5	922.88	1105.86	1555.19	299.39	1717.68	2115.45	1519.77	618.9	618.32	1071.86	989.82	1034.42	267.81	981.69	1914.35	940.194	1113.24	0.2437	0.580485
hsa-miR-4766-3p	0	0	0	0.1	0	0	0.1	0.12	0.28	0	0	0	0	0	0	0	0	0.27	0	0	0.06	0.027	-1.152	0.581043
hsa-miR-4494	0	0	0	0	0	0	0	0	0	0	0	0	0	0	0	0	0	0	0	0.19	0	0.019	0.926	0.581343
hsa-miR-149-3p	0	0	0	0	0	0	0	0	0	0	0	0	0	0	0	0	0	0	0	0.19	0	0.019	0.926	0.581521
hsa-miR-6769b-5p	0	0	0	0	0	0	0	0	0	0	0	0	0	0	0	0	0	0	0	0.19	0	0.019	0.926	0.581679
hsa-miR-7109-5p	0	0	0	0	0	0	0	0	0	0	0	0	0	0	0	0	0	0	0.21	0	0	0.021	1.0704	0.584581
hsa-miR-3143	6.08	5.05	2.42	4.94	3.78	1.63	3.68	2.25	4.51	0.93	2.32	2.51	0.5	3.03	2.74	4.36	3.64	20.48	2.01	0	3.527	4.159	0.2378	0.586066
hsa-miR-379-3p	1.91	1.03	1.7	0.72	4.64	1.73	1.07	4.12	1.6	4.39	6.44	2.91	0.5	0.98	1.64	3.47	3.27	1.77	0.32	0.37	2.291	2.167	-0.0803	0.586711
hsa-miR-146a-3p	2.62	1.31	0.18	0.72	0	0.54	0.78	0.25	2.07	0.23	0.27	0.8	0	0	0	2.38	2.61	1.06	0.42	0	0.87	0.754	-0.2065	0.586927
hsa-miR-6501-5p	6.68	17.77	7.8	10.6	24.6	14.63	42.63	9.36	5.46	13.76	8.31	7.44	14.16	33.39	11.51	8.62	9.52	1.6	18.23	22.11	15.329	13.489	-0.1845	0.58707
hsa-miR-4640-3p	0	0	0.18	0	0	0	0	0	0	0	0	0	0	0	0	0	0	0	0	0	0.018	0	-0.848	0.587447
hsa-miR-4750-5p	0	0.28	0.27	0.31	0.17	0.76	0.19	0.87	0.09	0.46	0.45	0.4	0.5	0.2	0.66	0.69	0.28	0	0.53	0.93	0.34	0.464	0.4486	0.587796
hsa-miR-518f-3p	0	0.19	0	0	0	0	0	0	0	0	0	0	0	0	0	0	0	0	0	0	0.019	0	-0.926	0.588534
hsa-miR-4526	0	0	0	0	0.17	0	0.48	0.25	0.09	0.12	0.18	0	0.1	0.1	0.44	0.1	0	0	0	0	0.111	0.092	-0.2709	0.588799
hsa-miR-4723-5p	0.12	0.09	0.18	0	0.09	0	0.19	0	0.09	0.12	0.18	0.1	0.2	0.39	0.44	0	0	0.09	0	0	0.088	0.14	0.6699	0.589016
hsa-miR-6129	0	0	0	0	0.09	0.33	0.1	0.12	0.09	0.12	0.36	0	0.4	0	0	0	0.28	0	0.21	0.19	0.085	0.144	0.7605	0.589439
hsa-miR-4753-5p	0.36	0.28	0.18	0.41	0.26	0.11	0.29	0.25	0.09	0.12	0.36	0.3	0.4	0	0.55	0.1	0.37	0.09	0.32	0.74	0.235	0.323	0.4589	0.589534
hsa-miR-24-3p	3128.43	2008.41	1239.01	1227.59	3409.5	2558.45	3166.64	2979.6	1079.71	3079.41	7769.8	2070.21	2113.87	2260.66	3169.09	4587	3382.35	1295.68	2964.99	905.14	2387.68	3051.88	0.3541	0.58987
hsa-miR-6783-3p	2.27	3.74	3.32	3.6	4.73	3.68	3.68	2.87	0.28	3.47	1.79	3.22	3.41	3.32	2.3	3.27	1.87	1.15	3.92	3.9	3.164	2.815	-0.1686	0.590311
hsa-miR-512-3p	0	0	0	0	0	0	0	0.25	0	0	0	0	0	0	0	0	0	0	0	0	0.025	0	-1.3219	0.590541
hsa-miR-4714-3p	0.12	0.09	0	0.1	0.09	0.11	0.1	0.12	0	0.12	0	0.1	0.1	0.1	0.11	0	0	0.09	0	0	0.085	0.05	-0.7655	0.59068
hsa-miR-4423-5p	0	0	0	0	0	0	0	0	0	0	0.36	0	0	0	0	0	0	0	0	0	0	0.036	1.848	0.591339
hsa-miR-1268a	1.78	0.84	0.63	0.82	1.81	8.66	1.16	1.5	0.66	1.5	9.57	0.4	2.92	0.88	3.61	3.66	2.8	0.97	1.49	1.12	1.936	2.742	0.5021	0.592707
hsa-miR-3661	0.12	0.47	0.09	0.1	0.34	0.11	0.1	0.12	0.09	0.12	0.27	0.2	0.1	0.39	0.44	0.3	0.37	0	0.11	0.37	0.166	0.255	0.6193	0.593082
hsa-miR-29a-3p	378.28	284.95	185.8	88.74	666.62	875.21	648.79	857.27	186.14	1129.04	3143.01	214.57	432.92	341.28	642.96	320.99	849.7	404.59	923.6	126.17	530.084	739.979	0.4813	0.594631
hsa-miR-215-5p	16.58	8.98	8.07	13.07	11.01	3.47	6.98	4.62	12.6	4.74	6.79	9.85	4.32	3.71	3.4	10.7	7.93	41.4	6.78	9.11	9.012	10.399	0.2065	0.594812
hsa-miR-3156-5p	0	0	0	0	0	0	0	0	0	0	0	0.2	0	0	0	0	0	0	0	0	0	0.02	1	0.594865
hsa-let-7f-5p	71198.2	67040.3	96452.1	87204.6	38304.9	75333.5	64642.3	62607.7	90108.1	40802.8	43219.2	39286.1	62435.8	81481	75462.2	96719.5	57122.5	109576	53051.3	54485.5	69369.5	67283.9	-0.044	0.597236
hsa-miR-7855-5p	0.48	0.56	1.17	0.72	0.69	1.19	0.48	0.75	0.75	0.23	1.07	0.4	1.51	1.07	0.66	0.59	0.47	0.35	0.64	0.19	0.702	0.695	-0.0145	0.597716
hsa-miR-320d	3.34	3.93	4.21	5.25	4.04	3.58	2.13	5.12	0.66	5.44	5.99	2.11	2.51	5.86	5.7	5.25	3.27	0.98	2.97	2.79	3.77	3.743	-0.0104	0.598581
hsa-miR-182-3p	0.24	1.22	0.99	0.21	4.56	1.63	3.1	3.62	0.85	3.82	1.79	1.51	2.61	1.95	0.99	0.69	2.43	1.51	2.86	0.74	2.024	1.708	-0.2449	0.599286
hsa-miR-1537-3p	0.12	0.09	0	0	0	0	0.1	0	0.09	0	0.09	0.1	0.1	0	0.11	0	0	0.27	0	0	0.04	0.067	0.7442	0.599298
hsa-miR-378b	0.24	0.28	0.09	0.21	0.43	0.65	0.19	0	0.38	0.12	0.54	0.3	0.5	0.39	0.33	0.1	0.19	0.71	0.42	0	0.259	0.348	0.4261	0.600736
hsa-miR-652-3p	376.37	493.66	558.57	416.51	766.92	914.76	850.59	686.56	376.8	787.43	754.4	462.3	783.69	776.17	778.62	577.76	636.97	520.37	642.9	90.12	622.817	602.33	-0.0483	0.601204
hsa-miR-548u	0.6	0.47	0.45	0.51	0.34	0.22	0.19	0	1.13	0	0.36	0.5	0.1	0.1	0.66	0.5	0.09	0.71	0.21	0.37	0.391	0.36	-0.1192	0.602331
hsa-miR-548ar-3p	1.31	1.5	0.63	0.72	0.17	0.22	0.68	0.12	1.6	0.58	0.54	0.6	0.2	0.49	0.33	0.89	0.37	2.3	5.09	0	0.753	1.081	0.5216	0.602389
hsa-miR-433-3p	10.49	4.02	15.6	5.56	18.15	15.71	6.1	36.81	0.47	34.81	39.06	10.35	9.44	8.49	12.61	29.43	20.26	0.8	4.98	5.39	14.772	14.081	-0.0691	0.60241
hsa-miR-4306	1.19	1.4	2.33	1.34	4.82	3.58	5.33	1.75	2.16	1.85	2.68	1.01	2.71	3.9	3.95	5.35	4.85	4.26	3.18	0.37	2.575	3.226	0.3252	0.603304
hsa-miR-7849-3p	1.31	0.37	0.54	0.41	0.26	0.33	0.29	0.87	0.09	0.12	0.45	0.4	0.4	0.2	0.33	0.69	0.19	0.27	0.53	2.23	0.459	0.569	0.3099	0.604078
hsa-miR-151a-5p	110.91	68.57	86.53	81.32	140.46	144.32	235.12	140.01	25.3	124.43	203.97	82.11	99.42	97.42	120.74	96.03	174.08	63.12	116.71	57.23	115.697	111.083	-0.0587	0.604373
hsa-miR-618	13.6	9.54	9.95	4.22	22.45	127.52	36.04	94.34	6.49	177.05	62.21	10.45	66.28	0	61.85	34.19	82.89	10.55	91.06	3.9	50.12	42.338	-0.2434	0.604877
hsa-miR-1294	17.29	14.87	33.99	16.57	14.28	31.09	18.7	13.35	4.04	12.72	12.87	9.85	42.58	28.31	25.77	24.78	19.32	8.07	21.94	20.25	17.69	21.374	0.2729	0.605475
hsa-miR-6730-5p	0.12	0	0.09	0.1	0.09	0	0	0	0	0.12	0.09	0.2	0.2	0.1	0.11	0	0	0.09	0	0	0.052	0.079	0.6033	0.60552
hsa-miR-1224-5p	0.72	2.53	0.9	3.29	2.49	3.58	1.65	3.49	0.85	2.2	1.52	0.7	3.21	4.49	2.96	2.58	1.77	1.24	1.48	0.56	2.17	2.051	-0.0814	0.605753
hsa-miR-411-3p	3.34	1.96	2.69	1.03	7.14	2.17	1.65	4.62	0.94	4.97	11.26	6.73	1.1	0.78	2.52	9.12	6.91	0.71	0.64	1.11	3.051	4.088	0.4221	0.606388
hsa-miR-1249-5p	0.48	0	0.09	0	0	0.22	0.1	0.25	0.09	0.12	0.09	0	0	0.2	0.55	0.1	0	0	0	0	0.135	0.094	-0.5222	0.607777
hsa-miR-6743-3p	1.67	0.28	1.26	0.72	0.6	0.76	1.45	0.25	0.28	0	0.09	0.5	0.8	0.39	1.43	0.5	0.75	0	1.17	0.74	0.727	0.637	-0.1907	0.609228
hsa-miR-449a	0.24	0.19	0.27	0.41	0.34	0.98	0.39	1.12	0.38	0.23	0.89	0.5	1.21	0.59	0.66	0.4	0.56	0.71	0.32	0	0.455	0.584	0.3601	0.610469
hsa-miR-2467-3p	0	0	0.09	0	0	0	0.1	0	0	0.12	0.09	0	0.1	0	0	0	0	0	0	0.56	0.031	0.075	1.2746	0.61209
hsa-miR-1273c	2.98	2.43	2.42	2.06	3.44	4.12	1.74	2.5	1.5	2.31	3.58	3.22	3.01	2.93	2.85	1.39	2.8	2.48	1.38	0	2.55	2.364	-0.1093	0.612455
hsa-miR-146b-3p	43.17	21.89	20.36	15.96	32.86	32.5	24.32	55.78	6.77	35.04	79.91	21.31	21.39	28.41	37.29	39.64	28.19	7.27	33.18	53.15	28.865	34.974	0.277	0.614234
hsa-miR-93-3p	20.27	21.98	24.48	16.06	28.99	32.5	29.26	27.83	16.46	38.16	50.68	18.39	38.36	17.77	29.5	9.91	32.67	24.64	26.61	1.49	25.599	25.002	-0.034	0.61524
hsa-miR-4521	8.35	6.83	4.04	3.4	9.63	8.78	7.94	6.61	2.73	8.21	37.99	7.34	4.52	4.49	6.91	3.47	9.43	5.94	8.69	1.11	6.652	8.989	0.4344	0.615562
hsa-miR-26a-2-3p	1.31	0.19	0.18	0.41	0.09	0.33	0.39	0.37	0.66	0.12	1.07	0.3	0.1	0.2	0.33	1.29	1.12	0.8	0.53	0	0.405	0.574	0.5031	0.61557
hsa-miR-543	113.77	58.75	88.42	77.72	229.92	153.31	83.12	267.66	17.68	310.97	235.62	170.65	109.36	37.68	144.1	216.83	152.33	12.14	48.44	150.7	140.132	127.785	-0.1331	0.617179
hsa-miR-4804-3p	0.12	0	0	0	0	0.54	0	0.12	0	0.12	0.18	0.1	0.2	0	0.33	0.2	0	0	0.42	0	0.09	0.143	0.668	0.619087
hsa-miR-30c-2-3p	1.07	0.47	0.09	0.41	0.09	0.54	0.68	1	0.09	0.93	1.52	0.5	0.3	0.49	0.77	0.59	0.65	0.09	0.32	1.67	0.537	0.69	0.3617	0.619593
hsa-miR-4708-3p	0	0.09	0	0	0	0	0	0	0.09	0	0.63	0	0.1	0	0	0.1	0	0	0	0	0.018	0.083	2.2051	0.619666
hsa-miR-6826-5p	0	0	0	0.1	0	0.43	0.1	0	0	0	0	0	0	0.2	0.11	0	0	0	0	0	0.063	0.031	-1.0231	0.619688
hsa-miR-548x-5p	0.36	0	0.9	0.3	0.51	0.66	0.57	0	1.5	0.36	0.54	0	0	0	0	1.77	0.18	1.41	0.63	0	0.516	0.453	-0.1879	0.619794
hsa-miR-548g-5p	0.36	0	0.9	0.3	0.51	0.66	0.57	0	1.5	0.36	0.54	0	0	0	0	1.77	0.18	1.41	0.63	0	0.516	0.453	-0.1879	0.619857
hsa-miR-548aj-5p	0.36	0	0.9	0.3	0.51	0.66	0.57	0	1.5	0.36	0.54	0	0	0	0	1.77	0.18	1.41	0.63	0	0.516	0.453	-0.1879	0.619885
hsa-miR-6131	0	0.09	0	0.62	1.03	1.08	1.07	1	0.19	1.73	0.54	0.5	0.8	0.1	0.11	0.5	0.65	0.44	0.95	3.72	0.681	0.831	0.2872	0.620125
hsa-miR-4999-5p	1.55	3.09	1.7	1.65	2.15	2.28	1.74	1.62	1.32	1.39	1.52	2.11	1.51	3.22	2.19	2.38	1.87	0.71	1.7	0.93	1.849	1.814	-0.0276	0.620579
hsa-miR-3187-5p	0	0.09	0.18	0.1	0.43	0.33	0	0	0	0.12	0.27	0.1	0.2	0.2	0.33	0.1	0.09	0.09	0.21	0.19	0.125	0.178	0.5099	0.620848
hsa-miR-6130	2.27	2.81	7.44	4.32	4.39	13.11	6.78	4.24	2.54	3.12	4.2	1.31	17.07	6.54	4.61	7.83	7.37	6.74	3.5	2.97	5.102	6.214	0.2845	0.621436
hsa-miR-1234-3p	0.6	0.94	0.99	0.41	0.95	0.76	0.78	1.25	0.28	1.16	0.72	0.7	1.61	2.93	1.1	0.89	0.75	0.27	0.95	0.19	0.812	1.011	0.3162	0.621983
hsa-miR-6848-5p	0	0	0	0.1	0	0.11	0.1	0.25	0	0	0.09	0	0.3	0.1	0	0	0.09	0	0.11	0.19	0.056	0.088	0.6521	0.622433
hsa-miR-6820-3p	0	0.28	0.18	0.1	0.6	0.33	0.87	0.12	0.09	0.58	0.45	0.3	1.1	0.59	0.33	0.2	0.47	0.09	0.32	0.37	0.315	0.422	0.4219	0.623085
hsa-miR-4667-3p	0.24	0	0.27	0	0	0.22	0	0	0	0	0	0	0.1	0	0.11	0	0	0	0.11	0.19	0.073	0.051	-0.5174	0.623243
hsa-miR-185-3p	94.69	97.29	114.51	95.53	185.62	281.05	186.78	182.56	43.17	154.39	160.27	116.08	233.48	182.45	151.78	170.45	126.67	104.52	205.64	172.82	143.559	162.416	0.178	0.623613
hsa-miR-548ar-5p	0.48	0	1.26	0.4	0.51	0.88	0.76	0	1.88	0.48	0.72	0	0.1	0	0	2.36	0.27	1.85	0.74	0	0.665	0.604	-0.1388	0.623677
hsa-miR-3186-5p	0	0.28	0	0	0.17	0	0	0.12	0.09	0.69	0.18	0.1	0.3	0.39	0.22	0.3	0.19	0	0.53	0	0.135	0.221	0.7111	0.624336
hsa-miR-378g	2.62	4.3	1.88	2.26	4.9	5.85	1.74	1	1.22	2.78	6.53	4.02	7.43	2.54	3.29	2.08	2.05	0.98	1.8	4.83	2.855	3.555	0.3164	0.624818
hsa-miR-4754	0.24	0.09	0.27	0.51	0.17	0.54	0.39	0.25	0.19	0.23	0	0.5	0.6	0.29	0	0.1	0	0.09	0.53	0.19	0.288	0.23	-0.3244	0.624837
hsa-miR-7112-3p	0	0	0	0	0.09	0	0	0	0	0	0.09	0	0.1	0	0	0	0	0	0.11	0	0.009	0.03	1.737	0.625266
hsa-miR-6802-5p	0	0	0	0	0.09	0	0	0	0	0	0.09	0	0	0.1	0.11	0	0.09	0	0	0	0.009	0.039	2.1155	0.625266
hsa-miR-518f-5p	0.12	0.09	0	0	0	0	0.1	0	0	0	0.09	0	0	0	0	0	0	0	0	0	0.031	0.009	-1.7843	0.625266
hsa-miR-6869-5p	0	0	0	0	0	0	0.1	0	0	0	0.09	0	0.1	0	0	0.1	0.09	0	0	0	0.01	0.038	1.926	0.625266
hsa-miR-3907	0.12	0	0	0	0	0	0	0	0	0	0.09	0	0	0.1	0.11	0	0	0	0.11	0	0.012	0.041	1.7726	0.625681
hsa-miR-4469	0	0.09	0	0	0	0.11	0.1	0	0	0	0	0	0	0	0	0	0.09	0	0	0	0.03	0.009	-1.737	0.625835
hsa-miR-5091	0.12	0	0	0	0	0.11	0	0.12	0	0	0.09	0	0	0	0	0	0.09	0	0	0	0.035	0.018	-0.9594	0.626781
hsa-miR-6887-3p	0	0	0.09	0	0	0.11	0	0	0	0.12	0	0	0	0.1	0	0	0	0	0	0	0.032	0.01	-1.6781	0.627238
hsa-miR-4651	0	0	0	0	0	0	0	0.12	0	0	0	0	0.1	0.1	0	0	0	0	0.11	0	0.012	0.031	1.3692	0.627249
hsa-miR-6513-5p	0.95	0.75	0.9	0.72	3.44	4.33	2.71	2	0.94	1.85	4.38	1.51	4.22	3.22	3.4	2.08	1.68	1.06	2.23	0	1.859	2.378	0.3552	0.62856
hsa-miR-3074-5p	7.16	14.03	12.46	6.69	13.5	17.88	14.05	14.6	1.88	14.57	21.01	11.76	17.98	17.38	19.08	13.58	13.44	3.1	13.78	9.66	11.682	14.077	0.2691	0.628596
hsa-miR-6798-3p	0.6	0.47	0.27	0.21	1.2	0.98	1.07	1.25	0	1.04	1.16	0.7	0.3	0.2	1.1	0.3	1.12	0.27	0.53	0.56	0.709	0.624	-0.1842	0.628915
hsa-miR-4664-5p	0	0	0	0	0	0	0	0	0	0.12	0	0.1	0.1	0	0	0	0.09	0	0	0	0.012	0.029	1.273	0.628929
hsa-miR-1269a	0.12	0	0	0.1	0	0	0.1	0	0	0	0	0	0	0	0	0	0	0	0.11	0	0.032	0.011	-1.5406	0.628948
hsa-miR-636	3.82	5.89	6.37	7.51	12.04	8.34	12.11	10.73	1.6	5.55	4.02	5.83	8.44	12.98	10.86	8.92	4.48	1.15	10.71	1.86	7.396	6.925	-0.0949	0.629002
hsa-miR-548aw	0	0	0	0	0	0	0	0.12	0	0	0	0	0	0.1	0	0	0.09	0.09	0	0	0.012	0.028	1.2224	0.629604
hsa-miR-520g-3p	0.12	0	0	0	0	0	0.1	0.12	0	0	0	0.1	0	0	0	0	0	0	0	0	0.034	0.01	-1.7655	0.630205
hsa-miR-574-3p	30.77	30.68	36.77	14.51	24.17	37.6	37.98	38.68	10.44	33.42	70.79	11.16	34.34	43.15	32.79	29.04	35.56	11.08	32.65	2.23	29.502	30.279	0.0375	0.630288
hsa-miR-210-5p	0.6	0.47	0.81	0.62	1.72	0.87	1.74	1.62	0.56	1.73	1.34	1.31	2.11	1.37	0.66	0.89	0.65	0.18	1.27	0.19	1.074	0.997	-0.1073	0.630903
hsa-miR-484	1207.11	1268.25	1311.2	1378.5	2917.49	4402.59	3171.59	3038.25	346.14	3354.06	4911.75	2112.73	4358.29	2629.56	3943.32	1974.59	2762.56	936.57	3153.88	498.19	2239.52	2728.14	0.2847	0.63168
hsa-miR-16-1-3p	0.6	0.28	0.18	0.1	0.09	0.22	0.29	0.37	0.75	0.58	0.89	0.1	0.3	0.49	0.22	0.2	0.37	1.6	0.21	0.19	0.346	0.457	0.4014	0.632037
hsa-miR-660-3p	0.24	0.37	0.63	0.21	3.44	5.53	1.45	1.62	0.28	1.39	3.93	0.7	2.91	2.93	2.74	0.69	1.31	2.22	0.74	0.37	1.516	1.854	0.2904	0.632105
hsa-miR-99b-3p	24.81	11.69	7.8	2.78	6.37	14.95	12.59	29.32	1.5	17.46	37.45	12.26	4.42	4.78	28.62	38.25	9.43	2.04	8.9	18.95	12.927	16.51	0.353	0.632297
hsa-miR-4659b-3p	7.39	5.61	6.37	4.12	8.77	7.26	9.88	7.86	4.33	9.25	13.5	5.83	6.43	5.08	5.26	6.14	8.49	4.7	12.3	2.97	7.084	7.07	-0.0029	0.632357
hsa-miR-3115	0.24	0.09	0.27	0	0.17	0.22	0.29	0.25	0.09	0	0.36	0	0	0.39	0.11	0	0.28	0.09	0.11	0	0.162	0.134	-0.2738	0.633167
hsa-miR-136-5p	0.24	0	0.09	0.1	0	0	0.1	0.25	1.41	0.23	0.36	0	0.1	0.1	0.33	0.69	0.28	0.71	0	0	0.242	0.257	0.0868	0.633279
hsa-miR-629-3p	1.19	1.31	1.79	0.21	0.77	2.28	1.55	1.5	0.28	1.97	3.49	0.8	2.61	2.25	2.3	0.79	1.21	0.44	2.54	0.19	1.285	1.662	0.3712	0.635273
hsa-miR-532-5p	1475.67	1369.66	1237.13	1069.88	2085.37	1127.65	985.73	830.19	347.17	820.85	1209.46	2691.11	1517.17	1379.84	1262.46	1521.6	895.99	601.75	963.67	819.48	1134.93	1286.25	0.1806	0.639097
hsa-miR-1301-3p	106.26	62.21	69.14	21.93	47.22	69.12	71.01	100.83	12.79	80.6	141.94	53.06	56.34	69.99	124.8	91.27	54.05	16.67	92.33	72.84	64.111	77.329	0.2704	0.63915
hsa-miR-877-5p	8.71	7.2	12.46	7.93	8.34	16.9	10.37	18.22	3.76	9.14	17.34	5.83	17.88	19.62	15.79	15.86	9.33	5.85	10.49	6.5	10.303	12.449	0.273	0.639157
hsa-miR-6087	0	0	0.18	0	0.17	0.22	0.19	0.37	0	0.12	0.18	0	0.4	0.49	0.11	0.2	0.19	0.09	0	0	0.125	0.166	0.4093	0.64
hsa-miR-6729-5p	0.24	0.28	0.18	0.1	0	0.22	0	0	0	0	0.18	0	0.4	0.39	0.22	0.1	0.28	0	0	0	0.102	0.157	0.6222	0.640867
hsa-miR-3934-5p	1.31	0.75	1.97	0.21	0.69	1.08	0.29	1	0.28	0.12	2.23	0.6	0.2	0.2	0.22	1.29	0.37	0.98	0.64	0.37	0.77	0.71	-0.117	0.642754
hsa-miR-200c-3p	53.19	34.24	22.78	26.25	30.36	48.76	31.87	39.06	30.48	52.16	89.29	33.67	30.13	39.15	46.61	38.45	37.15	20.74	40.6	14.31	36.915	39.01	0.0796	0.643177
hsa-miR-6883-3p	0.95	0.09	0.27	0.1	0.43	0.33	0.19	0.12	0.09	0.12	0.54	0.2	0.1	0.39	0.22	0	0.37	0	0.32	0.19	0.269	0.233	-0.2073	0.643436
hsa-miR-18b-3p	0.72	1.78	1.7	0.62	1.29	2.06	1.74	1.62	0.28	1.73	2.06	1.31	3.82	1.46	1.32	0.59	2.89	0.89	1.91	0.19	1.354	1.644	0.28	0.644714
hsa-miR-3177-5p	0.12	0	0.09	0	0.26	0.22	0	0	0	0	0.18	0.1	0.3	0.2	0.11	0.1	0.09	0	0	0	0.069	0.108	0.6464	0.644921
hsa-miR-4655-5p	0.24	0	0.18	0	0	0	0	0	0.09	0.23	0.09	0	0.2	0.1	0	0	0	0	0.21	0	0.074	0.06	-0.3026	0.645279
hsa-miR-96-3p	0	0	0	0	0	0	0	0.12	0	0	0.09	0	0	0	0	0	0.09	0	0.21	0	0.012	0.039	1.7004	0.645553
hsa-miR-5696	0	0	0.09	0.21	0	0.11	0.19	0	0.38	0	0.18	0	0	0.2	0	0.2	0	0.27	0	0	0.098	0.085	-0.2053	0.646274
hsa-miR-579-5p	6.08	6.83	19.91	6.07	6.11	12.03	6.49	3.49	1.13	4.39	3.58	9.95	10.24	8.79	9.1	11	5.04	0.62	8.69	1.11	7.253	6.812	-0.0905	0.648376
hsa-miR-642a-5p	3.34	0.94	1.43	0.82	1.81	3.68	0.78	4.12	0.28	4.51	11.89	0.3	1.71	2.73	3.51	1.98	3.92	0.18	4.88	0	2.171	3.11	0.5186	0.649129
hsa-miR-4658	0	0	0	0.1	0	0	0	0	0.09	0	0	0	0	0.1	0	0	0	0	0	0	0.019	0.01	-0.926	0.649739
hsa-miR-20b-3p	1.43	1.22	1.17	1.03	0.69	0.76	0.29	0.12	0.47	0.46	0.8	0.2	0.6	0.49	0.55	1.39	0.65	1.24	0.42	0.74	0.764	0.708	-0.1098	0.650381
hsa-miR-1306-5p	21.23	21.14	25.2	18.43	39.31	45.29	33.33	25.96	2.35	28.56	36.11	16.48	54.23	17.86	38.38	23.19	24.27	7.45	30	2.97	26.08	25.094	-0.0556	0.651116
hsa-miR-1249-3p	10.73	7.3	11.3	3.81	6.54	14.08	7.94	11.85	1.32	9.14	23.33	3.32	13.76	2.05	9.76	5.45	8.96	2.84	11.13	4.27	8.401	8.487	0.0147	0.651126
hsa-miR-379-5p	27.19	11.04	30.58	17.09	33.89	13	5.81	24.46	32.26	21.86	36.92	15.18	6.73	9.57	14.37	85.52	31.64	14.27	4.13	16.17	21.718	23.45	0.1107	0.651819
hsa-miR-6738-5p	0	0	0	0	0	0.11	0	0	0	0	0	0	0	0	0	0.2	0	0	0.11	0	0.011	0.031	1.4948	0.651839
hsa-miR-3196	0	0	0.18	0	0.17	0.11	0	0.12	0	0	0.09	0	0	0.1	0.22	0.4	0	0.09	0.11	0	0.058	0.101	0.8002	0.654153
hsa-miR-501-5p	6.56	9.26	11.21	5.87	9.03	8.88	21.12	13.35	6.4	13.41	9.12	10.95	19.08	9.66	11.73	6.54	8.68	5.94	16.11	3.16	10.509	10.097	-0.0577	0.654606
hsa-miR-6862-5p	0.24	0.47	0.09	0.31	0.69	0.22	0	0.12	0.09	0.23	0.54	0.4	0.2	0.29	0.11	0.1	0.19	0	0.42	0	0.246	0.225	-0.1287	0.65601
hsa-miR-1909-5p	0	0.09	0.18	0.1	0.17	0.22	0.1	0.12	0	0	0.18	0	0	0.2	0.22	0	0	0	0.11	0.19	0.098	0.09	-0.1229	0.656027
hsa-miR-5088-5p	0	0	0	0	0	0.11	0	0	0	0	0	0	0.2	0	0	0.1	0	0	0	0	0.011	0.03	1.4475	0.657126
hsa-miR-3677-3p	0	0	0	0	0	0	0.1	0	0	0	0.18	0	0.2	0	0	0	0	0	0	0	0.01	0.038	1.926	0.657312
hsa-miR-6838-5p	0	0	0	0	0.09	0	0	0	0	0	0.27	0	0	0	0	0	0	0.09	0	0	0.009	0.036	2	0.658159
hsa-miR-3922-3p	0	0	0	0.1	0	0	0	0	0	0	0	0	0	0.1	0	0	0	0	0	0.19	0.01	0.029	1.5361	0.658392
hsa-miR-548d-5p	13.36	8.89	24.3	17.4	7.4	19.18	19.28	19.09	26.43	8.79	9.92	7.34	20.39	22.45	32.13	31.71	13.16	47.16	15.26	6.88	16.412	20.64	0.3307	0.65843
hsa-miR-1229-5p	0	0	0	0.1	0	0	0	0	0	0	0	0	0.1	0	0	0	0.19	0	0	0	0.01	0.029	1.5361	0.658586
hsa-miR-6851-5p	0	0	0	0	0	0.22	0.1	0	0	0	0	0	0.1	0	0	0	0	0	0	0	0.032	0.01	-1.6781	0.659258
hsa-miR-4659b-5p	0.36	0	0	0	0.17	0	0.1	0.12	0	0	0.09	0	0.2	0	0.11	0	0.19	0.18	0.21	0	0.075	0.098	0.3859	0.659852
hsa-miR-29c-5p	14.19	16.56	13.72	14.82	30.19	31.85	39.33	30.57	16.74	34.81	24.67	32.66	18.28	25.19	30.82	15.36	27.82	14.18	29.36	14.12	24.278	23.246	-0.0627	0.660194
hsa-miR-1273e	0	0.19	0	0	0.09	0	0	0	0	0	0	0	0	0	0.11	0	0	0	0	0	0.028	0.011	-1.3479	0.660459
hsa-miR-33a-5p	0.24	0	0.18	0	0.09	0.33	0.48	0.12	0.28	0	0.98	0.2	0.3	0.1	0.22	0.4	0.09	0.35	0	0	0.172	0.264	0.6181	0.660475
hsa-miR-6821-5p	0.24	0	0	0	0	0.11	0	0	0	0	0	0	0.1	0	0	0	0	0	0	0	0.035	0.01	-1.8074	0.660715
hsa-miR-3150b-3p	0.95	0.28	0.45	0.41	1.12	2.17	1.65	2.12	0.47	0.58	1.25	0.3	2.71	1.46	1.97	1.59	0.65	0.35	1.48	0.74	1.02	1.25	0.2934	0.660886
hsa-miR-935	0.24	0.47	0.18	0	0.26	1.19	0.68	0.87	0	1.39	0.36	0.1	0.5	0.88	0.33	0.59	0.93	0	0.74	0	0.528	0.443	-0.2532	0.661076
hsa-miR-1293	0	0	0	0	0	0	0	0.12	0	0	0	0	0.1	0	0	0	0	0	0.21	0	0.012	0.031	1.3692	0.663054
hsa-miR-4757-5p	0	0	0	0.31	0	0	0.19	0.12	0	0	0	0.1	0.1	0	0.22	0.2	0.19	0	0.21	0	0.062	0.102	0.7182	0.666357
hsa-miR-335-5p	7.39	3.09	2.33	3.81	2.32	0.65	3	1.75	57.85	0.35	6.35	2.61	0.4	0.98	0.77	2.28	4.95	56.65	0.21	0	8.254	7.52	-0.1344	0.667328
hsa-miR-412-3p	0	0.09	0.18	0	0.09	0.33	0	0.25	0.28	0.35	0.63	0	0	0	0.11	0.3	0.09	0	0.21	0.19	0.157	0.153	-0.0372	0.668844
hsa-miR-1291	2.03	1.5	1.26	1.03	1.38	2.17	1.45	2.25	0.66	3.47	2.41	0.6	1.81	1.85	1.75	1.88	1.96	0.62	3.5	0.56	1.72	1.694	-0.022	0.66945
hsa-miR-4512	0.12	0	0	0	0.09	0.11	0.1	0	0.09	0.23	0.45	0	0.3	0.2	0.11	0	0.09	0	0.11	0	0.074	0.126	0.7678	0.669761
hsa-miR-6751-3p	0	0.09	0	0.1	0.09	0.22	0.19	0	0	0	0.36	0	0	0.1	0.33	0.3	0.09	0.09	0	0	0.069	0.127	0.8802	0.670729
hsa-miR-4325	0	0	0	0	0	0.22	0	0	0.09	0	0	0	0.1	0	0	0	0	0	0	0	0.031	0.01	-1.6323	0.67093
hsa-miR-6726-3p	0.6	1.87	1.35	1.34	1.89	1.95	1.94	2.62	0.56	2.08	1.34	1.81	2.41	2.15	2.3	2.08	1.68	0.27	1.27	0.37	1.62	1.568	-0.0471	0.67147
hsa-miR-147a	0	0.09	0	0	0	0	0	0	0	0.23	0	0	0	0	0	0	0	0.09	0	0	0.032	0.009	-1.8301	0.671663
hsa-miR-1273d	0.24	0	0.36	0.21	0.09	0.22	0.19	0	0	0.12	0.54	0	0.1	0.39	0.33	0	0.28	0	0.32	0.19	0.143	0.215	0.5883	0.672374
hsa-miR-4459	0	0.09	0.09	0.21	0.09	0.11	0	0.25	0.09	0.12	0.18	0	0.2	0.1	0	0.1	0.19	0	0.21	0	0.105	0.098	-0.0995	0.673441
hsa-miR-708-3p	1.07	0	0.09	0.41	0	0	0	0	0	0.12	0.72	0.1	0	0	0	0.3	0.09	0	0	0.19	0.169	0.14	-0.2716	0.673456
hsa-miR-4421	0.36	0.19	0	0	0.17	0.22	0.19	0.12	0.19	0	0.18	0.2	0.2	0.1	0	0.79	0.19	0	0.21	0.19	0.144	0.206	0.5166	0.67487
hsa-miR-141-3p	1.31	0.09	0.09	0.93	0.43	0.22	0.1	0.25	0.19	0.46	0.98	0.2	0.2	0.39	0.11	0.5	0.47	0.71	0.11	0	0.407	0.367	-0.1492	0.677421
hsa-miR-27b-5p	4.29	3.37	1.35	1.34	2.15	3.25	1.84	3.49	0.28	2.43	7.24	2.11	1.71	2.64	3.51	3.77	3.64	1.06	1.91	1.49	2.379	2.908	0.2897	0.679256
hsa-miR-3165	0	0	0.18	0	0.09	0	0.19	0	0.56	0	0.18	0.1	0	0	0.11	0.2	0	0.27	0.11	0	0.102	0.097	-0.0725	0.679281
hsa-miR-4642	0.12	0.28	0.09	0.31	1.12	0.76	0.39	0.87	0.09	0.69	0.98	0.4	0.6	0.68	0.99	0.89	0.56	0.27	0.32	0.19	0.472	0.588	0.317	0.680589
hsa-miR-15b-5p	1105.38	1566.77	1382.58	755.5	4157.75	6335.25	5730.71	4396.78	858.01	4364.57	3647.14	697.17	4070.18	3826.46	3388.42	1874.1	4213.85	2040.69	4468.42	132.12	3065.33	2835.86	-0.1123	0.682303
hsa-miR-103a-3p	16303.4	18266.7	12925	12899.6	30607.5	29179.6	19886.5	21890	20243.1	22759.1	30193.1	19294.1	21472	23623.4	23292.9	16748.2	21932	26412.9	17163.5	2127.31	20496.1	20225.9	-0.0191	0.682833
hsa-miR-6503-5p	1.55	1.96	0.18	0.21	1.46	2.38	2.33	2.5	0.56	2.78	6.26	0.9	0.3	1.07	1.21	1.98	1.96	0.27	1.8	0.74	1.591	1.649	0.0517	0.683429
hsa-miR-6782-3p	0.95	1.68	0.54	0.51	0.26	0.76	0.58	1.75	0	1.16	1.16	0.5	1.81	1.27	1.43	1.68	1.03	0.35	1.06	0	0.819	1.029	0.3293	0.68439
hsa-miR-144-3p	113.05	87.38	134.42	256.84	321.7	239.66	304.78	192.42	2070.43	83.38	310.61	51.56	147.42	160.19	251.24	177.89	174.36	3902.48	153.7	7.43	380.406	533.688	0.4885	0.685568
hsa-miR-100-5p	30.53	273.91	5.92	22.65	10.92	20.48	128.46	8.36	3.48	260.2	192.53	547.03	13.36	7.42	6.8	18.93	8.87	4.34	4.03	103.13	76.491	90.644	0.2449	0.685823
hsa-miR-133a-5p	0	0	0	0	0.09	0.54	0	0.12	0	0.23	0.18	0	0.1	0	0.22	0	0	0.09	0.11	0	0.098	0.07	-0.4854	0.685923
hsa-miR-4433a-3p	0.12	0.09	0	0	0	0.22	0.19	0.5	0	0	0.09	0.1	0	0	0.22	0.1	0.09	0	0	0.19	0.112	0.079	-0.5036	0.686314
hsa-miR-548ad-5p	41.5	30.31	90.47	64.75	23.32	72.92	63.95	67.63	96.88	30.07	30.21	21.21	75.22	85.12	119.42	116.35	43.68	179.07	53.84	10.78	58.18	73.49	0.337	0.687081
hsa-miR-548ae-5p	41.5	30.31	90.47	64.75	23.32	72.92	63.95	67.63	96.88	30.07	30.21	21.21	75.22	85.12	119.42	116.35	43.68	179.07	53.84	10.78	58.18	73.49	0.337	0.687125
hsa-miR-323a-3p	5.49	4.02	8.34	1.75	13.16	10.51	3.2	19.47	2.26	20.93	34.06	7.94	5.32	3.22	5.81	11.1	16.52	2.57	3.07	2.23	8.913	9.184	0.0432	0.688567
hsa-miR-7113-5p	0.6	0.94	0.72	0.51	0.43	0.11	0.29	0.62	0.09	0.46	0.54	0.3	0.6	1.07	1.43	1.59	0.19	0	0.32	0.37	0.477	0.641	0.4263	0.689295
hsa-miR-4774-5p	0	0	0.09	0	0.09	0	0	0	0	0	0	0	0.1	0.1	0.11	0	0.09	0	0	0	0.018	0.04	1.152	0.690364
hsa-miR-138-5p	0.24	0	0	0	0.17	0.11	0	0.37	0.18	0.35	0.45	0	0.2	0	0.66	0	0	0	0	0	0.142	0.131	-0.1163	0.691063
hsa-miR-6727-3p	0.12	0	0.09	0	0.09	0.11	0	0	0	0	0	0	0.1	0	0	0	0	0	0.11	0	0.041	0.021	-0.9652	0.691147
hsa-miR-374b-3p	2.5	1.68	2.6	1.96	2.75	2.17	3.68	4.49	3.2	3.7	6.88	2.71	1.81	2.05	3.18	3.96	4.11	7.27	2.76	0.19	2.873	3.492	0.2815	0.691233
hsa-miR-4491	0	0	0.09	0.1	0.09	0.11	0	0	0	0	0	0	0.1	0	0	0.1	0	0	0	0	0.039	0.02	-0.9635	0.691302
hsa-miR-3128	0.48	0.19	0.18	0.41	0.17	0	0.19	0	0.85	0	0.18	0.2	0	0	0	0.2	0.09	2.57	0	0	0.247	0.324	0.3915	0.692083
hsa-miR-450a-2-3p	1.19	0.56	0.63	0.51	0.34	0.54	0.87	1.25	0.19	1.16	1.52	0.1	0.7	1.17	0.77	0.79	0.47	0.27	0.95	0.37	0.724	0.711	-0.0261	0.692341
hsa-miR-1972	0	0	0.09	0	0	0	0	0.12	0	0	0.09	0	0.1	0	0	0	0.09	0.09	0	0	0.021	0.037	0.8171	0.692442
hsa-miR-501-3p	198.68	228.92	237.19	176.13	384.58	302.07	252.66	228.36	42.7	209.2	202.9	256.38	320.75	282.02	227.44	276	216.37	102.57	214.02	60.76	226.049	215.921	-0.0661	0.692473
hsa-miR-5000-5p	0	0	0	0	0	0	0.1	0	0	0.12	0.18	0	0.1	0	0	0.1	0.09	0	0	0	0.022	0.047	1.0952	0.692622
hsa-miR-23a-3p	573.26	447.92	461.91	166.66	496.66	638.91	580.59	687.56	447.35	730.88	2102.4	193.46	485.24	510.06	572.89	501.65	816.19	980.19	527.26	40.7	523.17	673.004	0.3633	0.693368
hsa-miR-130b-5p	245.43	128.72	73.8	89.97	105.89	132.07	132.34	145.75	19.19	115.18	226.77	109.75	135.57	100.94	146.4	150.63	134.6	32.89	120.95	202.18	118.834	136.068	0.1954	0.693412
hsa-miR-194-5p	445.9	469.71	284.98	323.96	595.57	311.06	590.18	352.02	720.49	352.37	527.63	322.21	172.32	250.2	291.16	319.3	585.63	1246.13	361.36	47.2	444.624	412.314	-0.1088	0.693488
hsa-miR-20b-5p	281.09	329.29	223.65	232.44	355.25	345.29	467.24	349.4	883.78	456.8	365.67	302	330.19	270.89	328.99	200.88	488.74	1122.47	313.45	26.39	392.423	374.967	-0.0656	0.693855
hsa-miR-548ay-3p	1.91	1.87	0.63	0.41	0.69	0.43	0.19	0.25	1.03	0.46	0.72	1.21	0.1	0.29	0.22	0.5	0.37	2.57	0.21	0	0.787	0.619	-0.3464	0.694541
hsa-miR-129-2-3p	0.12	0	0	0	0.17	0.33	0.1	0.12	0	0	0.27	0.1	0.2	0	0	0	0	0.18	0	0.37	0.084	0.112	0.415	0.694542
hsa-miR-221-5p	64.4	40.97	17.22	18.94	40.94	36.84	28.09	52.04	22.1	40.13	109.94	47.13	24.9	22.94	47.7	40.63	42.56	22.96	34.56	41.62	36.167	43.494	0.2661	0.695172
hsa-miR-381-5p	0	0	0.09	0	0.09	0	0	0	0.09	0.12	0.09	0.1	0	0	0	0	0	0	0	0	0.039	0.019	-1.0375	0.695309
hsa-miR-483-3p	0.12	0	0.45	0.1	0.34	0.33	0.1	0.5	0	0.23	0.09	0	0.3	0	0.55	0.2	0.75	0	0.53	0.37	0.217	0.279	0.3626	0.696606
hsa-miR-4474-3p	0.72	0.75	0.54	0.41	1.72	1.63	1.65	0.5	0.38	1.04	0.54	1.61	0.7	0.59	0.77	1.29	1.12	0.44	0.95	0.37	0.934	0.838	-0.1565	0.69788
hsa-miR-5588-5p	0.36	0.28	0.09	0.1	0.17	0.33	0.19	0.12	0.09	0.35	0.72	0.3	0.4	0.2	0.22	0.4	0	0.18	0.11	0.19	0.208	0.272	0.387	0.698874
hsa-miR-9-3p	0.12	0.19	0.18	0.1	0.43	0.22	0.1	0	0.85	0.12	2.06	0.1	0	0.1	0	0.2	0.37	1.24	0	0	0.231	0.407	0.8171	0.699039
hsa-miR-7-5p	8192.15	5027.73	11338.5	10448.1	2283.64	3114.25	5212.03	3269.6	9827.13	3280.97	1533.2	3470.5	3770.52	6609.48	6497.29	7405.65	2105.53	8942.23	6777.25	13165.2	6199.41	6027.69	-0.0405	0.699848
hsa-miR-6803-3p	4.17	2.99	6.1	1.75	3.7	4.66	3.68	5.62	0.94	5.09	2.86	2.01	5.22	4.78	6.36	2.97	3.64	1.51	6.57	1.49	3.87	3.741	-0.0489	0.700614
hsa-miR-6889-5p	0	0	0	0	0	0	0	0	0.09	0.12	0	0	0	0	0.11	0.1	0.09	0	0	0.19	0.021	0.049	1.2224	0.700801
hsa-miR-5584-3p	0	0	0	0	0.09	0.11	0.19	0	0	0	0.09	0	0	0	0	0	0	0	0.11	0	0.039	0.02	-0.9635	0.700886
hsa-miR-548ay-5p	23.97	16.28	48.6	33.87	13.34	38.79	37.3	37.81	53.43	17.35	18.5	12.87	40.07	44.22	62.73	60.85	26.04	95.56	29.68	8.92	32.074	39.944	0.3166	0.701074
hsa-miR-3922-5p	0	0	0.09	0	0.09	0	0	0	0	0	0	0	0	0	0.11	0.2	0	0.09	0	0	0.018	0.04	1.152	0.701316
hsa-miR-6731-3p	0.24	0	0.09	0.1	0	0.22	0.1	0	0	0.12	0.36	0	0	0	0.33	0.1	0.37	0	0.21	0	0.087	0.137	0.6551	0.701339
hsa-miR-101-3p	2428.52	1846.95	1090.61	2274.51	2464.44	664.26	685.89	772.91	6183.64	418.52	1421.48	849.13	368.35	894	691.65	1762.32	908.69	15102.4	396.88	337.82	1883.03	2273.27	0.2717	0.70136
hsa-miR-374b-5p	469.63	338.56	315.92	255.81	510.76	140.31	370.95	245.7	201.29	290.96	743.85	292.86	96.81	253.81	364.2	285.31	434.79	413.28	230.98	13.01	313.989	312.89	-0.0051	0.701548
hsa-miR-3653-3p	0.36	0.19	0.18	0.1	0	0.43	0	0	0	0	0.27	0	0.1	0.29	0.11	0.5	0.65	0	0	0	0.126	0.192	0.6077	0.701766
hsa-miR-3190-5p	0.12	0	0.09	0	0	0	0	0	0	0	0	0	0	0.1	0.11	0	0.19	0	0	0	0.021	0.04	0.9296	0.701951
hsa-miR-6892-3p	0	0	0	0	0.09	0.11	0	0	0	0	0	0.1	0	0	0.11	0	0.19	0	0	0	0.02	0.04	1	0.702246
hsa-miR-4662a-5p	1.79	0.56	0.18	0.51	0.52	0.11	0.39	0.37	0.56	0.12	0.98	0.5	0.2	0.59	0.11	0.59	0.56	0.44	0.42	0.37	0.511	0.476	-0.1024	0.702744
hsa-miR-6859-5p	2.5	3.27	3.05	4.43	2.49	2.71	2.03	2	1.32	2.54	1.34	2.61	1.31	3.81	3.73	2.77	1.21	0.71	1.91	5.95	2.634	2.535	-0.0553	0.702746
hsa-miR-6826-3p	0	0.09	0	0	0.09	0.54	0.1	0	0	0.12	0.27	0	0.2	0	0.33	0	0	0	0	0	0.094	0.08	-0.2327	0.703552
hsa-miR-23c	0.24	0.28	0.27	0	0.95	0.33	0.97	1	0.19	0.46	1.7	0.1	0.5	0	0.11	0.4	0.75	1.15	0.64	0.37	0.469	0.572	0.2864	0.703657
hsa-miR-590-3p	1.79	1.12	2.15	3.71	2.58	3.03	4.17	4.24	20.98	1.62	3.22	0.8	1.91	4.39	4.72	3.37	1.21	39.27	2.44	0	4.539	6.133	0.4342	0.703829
hsa-miR-299-5p	0.24	0	0.18	0	1.29	0.76	0.1	1	0.09	0.69	2.41	0.2	0.4	0	0.33	0.69	0.37	0	0	0	0.435	0.44	0.0165	0.704305
hsa-miR-424-3p	104.94	103	75.42	35.93	98.49	152.55	151.52	131.65	10.63	105.93	121.74	59.19	140.39	142.72	144.21	160.54	100.81	16.84	105.37	125.25	97.006	111.706	0.2036	0.704744
hsa-miR-6878-5p	0.12	0	0	0	0	0.11	0	0	0	0	0	0.1	0	0	0	0	0	0.09	0	0.19	0.023	0.038	0.7244	0.705006
hsa-miR-539-5p	1.79	0.75	2.42	0.93	1.55	2.06	0.48	2.75	0.66	3.7	3.22	0.9	0.9	1.07	1.54	5.35	2.15	0.35	0.53	1.49	1.709	1.75	0.0342	0.705827
hsa-miR-1180-3p	313.76	381.59	468.45	542.3	575.79	559.38	777.54	619.68	52.3	495.08	191.82	451.85	770.33	859.92	700.43	741.87	413.69	61.97	816.54	494.48	478.587	550.29	0.2014	0.708048
hsa-miR-149-5p	0.6	0.47	0.9	0.31	0.86	1.95	0.48	0.37	0.09	1.39	1.61	0.4	1.51	0.68	1.21	1.09	1.12	0.18	1.06	0.37	0.742	0.923	0.3149	0.708839
hsa-miR-541-3p	0.12	0.19	0.18	0	0	0.11	0.1	0.25	0.09	0.23	0.27	0.2	0	0	0	0.3	0.09	0	0.11	0.19	0.127	0.116	-0.1307	0.710386
hsa-miR-6751-5p	0.24	0	0	0	0.26	0.11	0.29	0	0	0	0	0.1	0	0.29	0	0.2	0.19	0.09	0.32	0	0.09	0.119	0.403	0.71039
hsa-miR-4435	1.19	2.62	1.26	2.16	2.15	1.63	1.36	1	0.38	1.16	1.7	1.91	1.61	1.95	2.3	1.68	1.68	0.18	2.12	2.79	1.491	1.792	0.2653	0.710983
hsa-miR-1273a	0.12	0.56	0.45	0.31	0.26	0.76	0.29	0.12	0	0	0.27	0.2	0	0.68	0.22	0.2	0.47	0.09	0	0.37	0.287	0.25	-0.1991	0.711354
hsa-miR-550b-3p	0	0	0.09	0	0	0.33	0	0.12	0.28	0	0.18	0	0	0.1	0.11	0	0	0	0	0.37	0.082	0.076	-0.1096	0.7125
hsa-miR-18a-3p	135.83	123.58	114.78	71.03	131.6	169.67	181.36	135.52	33.01	160.05	155.89	166.23	268.63	133.93	157.81	68.58	152.8	56.56	221.12	42.93	125.643	142.448	0.1811	0.712856
hsa-miR-6810-3p	0	0	0.09	0.21	0.17	0.11	0.19	0.12	0	0.12	0	0	0.2	0.1	0.22	0.4	0.09	0	0.32	0.19	0.101	0.152	0.5897	0.714211
hsa-miR-5000-3p	0.36	0.37	0.36	0.21	0.34	0.11	0.19	0.12	0.09	0.23	0.36	0.5	0.2	0	0	0.3	0.09	0.09	0.42	0.19	0.238	0.215	-0.1466	0.714769
hsa-miR-154-5p	0.36	0.09	0.45	0.21	0.6	1.08	0.48	1.62	0.09	1.73	1.61	0.1	0.5	0.29	1.1	0.3	1.96	0.18	0.42	0	0.671	0.646	-0.0548	0.714832
hsa-miR-6874-3p	0.24	0.19	0.09	0	0.17	0.22	0.1	0.12	0.09	0.23	0.27	0.3	0.1	0.1	0.11	0.2	0	0.09	0	0	0.145	0.117	-0.3095	0.716997
hsa-miR-6509-3p	0.48	0.75	1.17	0.21	0.6	0.54	0.58	0.5	0.19	0.69	1.25	0.6	0.9	0.39	0.77	0.2	0.47	0.62	1.06	0.74	0.571	0.7	0.2939	0.719354
hsa-miR-148b-5p	44.24	55.47	25.74	31.71	76.12	32.72	33.42	26.83	33.2	32.03	58.73	61.81	24.9	32.21	35.97	43.7	41.82	39.09	29.79	21.18	39.148	38.92	-0.0084	0.719968
hsa-miR-146a-5p	2222.09	1054.77	723.93	673.14	799.35	860.26	1562.93	2234.64	1849.49	1236.48	4183.36	1068.73	473.89	667.22	1328.15	1865.28	2002.94	1650.72	985.18	233.77	1321.71	1445.92	0.1296	0.721134
hsa-miR-10b-3p	0	0	0	0	0	0.33	0	0	0	0	0	0	0	0.1	0	0	0	0	0	0	0.033	0.01	-1.7225	0.721376
hsa-miR-422a	3.46	2.25	1.43	1.65	1.98	2.82	1.45	1.25	1.32	0.81	3.58	2.21	2.21	2.05	1.75	2.48	1.77	1.15	2.23	2.6	1.842	2.203	0.2582	0.721483
hsa-miR-32-3p	5.37	2.99	4.3	3.5	3.18	6.18	5.72	4.49	2.45	3.12	7.33	1.71	5.82	5.95	7.13	13.87	2.71	2.3	3.5	1.67	4.13	5.199	0.3321	0.72185
hsa-miR-1976	2.74	4.21	4.57	4.53	9.29	12.57	8.53	9.73	0.94	7.4	8.94	3.72	10.85	9.37	10.97	7.33	8.77	2.22	11.02	2.42	6.451	7.561	0.2291	0.721886
hsa-miR-532-3p	24.57	27.41	38.11	21.82	49.46	66.42	51.93	45.92	15.43	45.56	56.49	12.56	72.71	66.58	53.41	27.95	32.11	23.23	39.11	2.42	38.663	38.657	-0.0002	0.722087
hsa-miR-1255b-2-3p	0.72	0.09	0	0	0	0	0	0	0	0	0	0	0	0.29	0	0	0	0.09	0	0	0.081	0.038	-1.0919	0.724456
hsa-miR-3133	0.6	0.56	0.54	0.1	0.43	0.54	0.29	0.37	0.85	0.69	0.54	0.4	0.4	0.1	0.22	0.3	0.28	1.24	0.64	0.37	0.497	0.449	-0.1465	0.727002
hsa-miR-6855-5p	0.83	1.22	2.33	2.37	1.03	1.19	0.87	2.37	0.47	0.93	0.63	1.41	0.6	2.44	1.86	1.19	0.37	0.62	1.7	2.04	1.361	1.286	-0.0818	0.728378
hsa-miR-1292-5p	12.52	13.38	16.32	15.65	11.87	15.17	15.5	15.1	2.63	13.65	8.22	12.16	18.58	19.33	16.56	16.65	11.57	2.84	13.89	9.85	13.179	12.965	-0.0236	0.729631
hsa-miR-301a-3p	0.36	0.19	0.27	0.93	0.26	0.22	0.19	0.25	1.13	0	0.54	0.3	0.1	0.2	0.33	0.3	0.09	2.75	0.21	0	0.38	0.482	0.343	0.729736
hsa-miR-376c-3p	0.36	0	0.09	0	0.43	0	0	0.25	1.41	0.23	0.98	0.1	0	0.2	0.11	0.1	0.19	1.15	0	0	0.277	0.283	0.0309	0.729909
hsa-miR-3936	0	0	0.09	0.1	0	0	0	0	0	0	0	0	0.2	0	0.22	0	0	0	0	0	0.019	0.042	1.1444	0.731309
hsa-miR-3125	0	0	0	0	0.09	0	0	0	0	0	0	0	0	0	0	0	0	0	0	0.37	0.009	0.037	2.0395	0.731796
hsa-miR-542-3p	1.07	0.75	0.36	0.21	0.95	0.65	0.39	0.87	5.74	0.35	1.07	0.3	0.1	0.29	0.33	2.18	0.37	10.46	0.11	0.19	1.134	1.54	0.4415	0.731993
hsa-miR-7106-3p	0	0	0.09	0	0.09	0	0.1	0.12	0	0.12	0	0.1	0.1	0	0	0	0.09	0	0	0	0.052	0.029	-0.8425	0.7326
hsa-miR-5187-3p	0	0	0	0.1	0.09	0.11	0.1	0	0	0.12	0	0	0	0.1	0	0.1	0	0.09	0	0	0.052	0.029	-0.8425	0.733003
hsa-miR-30b-5p	125.46	82.42	62.68	43.34	125.33	55.91	81.67	108.44	253.96	92.98	345.56	63.52	31.33	51.35	68.98	51.53	193.03	463.45	72.82	3.53	103.219	134.51	0.382	0.733312
hsa-miR-6839-5p	0.36	0	0	0	0	0	0	0	0.09	0	0.09	0	0.1	0	0	0.1	0	0	0	0	0.045	0.029	-0.6339	0.733835
hsa-miR-548e-5p	0.12	0	0.09	0	0.09	0	0.1	0	0.09	0	0.09	0	0	0.1	0	0	0	0.09	0	0	0.049	0.028	-0.8074	0.733948
hsa-miR-23b-5p	2.98	2.71	1.88	3.5	1.46	2.82	1.84	3.87	0.28	3.12	4.29	2.21	2.61	2.15	3.07	2.58	2.71	0.44	2.44	6.13	2.446	2.863	0.2271	0.7342
hsa-miR-6797-3p	0.12	0.19	0.27	0	0.17	0.11	0.19	0.37	0	0.23	0.18	0.2	0.2	0	0.22	0.2	0.19	0	0.21	0	0.165	0.14	-0.237	0.734294
hsa-miR-4678	0.24	0.09	0	0.51	0.43	0.11	0.1	0.12	0.56	0	0	0.5	0	0.2	0.77	0.69	0.19	0.71	0	0	0.216	0.306	0.5025	0.734711
hsa-miR-181a-5p	9192.7	7421.39	4881.55	3864.06	8010.66	11730.6	10306.4	10972.8	2616.82	9628.86	18800.1	7486.9	15358.3	8650.98	10894.7	10854	7243.18	3455.86	7798.9	2715.62	7862.59	9325.85	0.2462	0.734818
hsa-miR-551a	0.36	0.19	0	0	0.6	0.22	0.68	0.75	0.28	0.93	1.34	0.1	0.7	0.39	0.33	0.4	0.75	0.44	0.64	0	0.401	0.509	0.3441	0.735073
hsa-let-7g-5p	47263.8	48963.7	56294.4	50965.6	39421.6	64243.2	51624.6	60714.1	36871.6	43310.9	48162.8	32321.1	52719.3	66678.4	66629.9	61849.8	52215.7	53793.2	52693.6	22525.9	49967.3	50959	0.0284	0.735223
hsa-miR-181d-5p	26.24	11.51	11.84	10.81	16.43	24.05	25.48	31.57	7.43	26.48	58.01	10.35	20.39	23.92	50.56	26.16	18.76	8.95	17.28	5.02	19.184	23.94	0.3195	0.735761
hsa-miR-28-3p	509.46	259.41	213.15	210.21	191.21	216.91	212.07	350.77	132.62	263.9	756.82	301.2	187.09	222.18	308.71	492.83	236.53	128.01	200.66	268.7	255.971	310.273	0.2776	0.736829
hsa-miR-548k	12.88	8.51	7.53	8.03	8.17	5.09	5.52	6.11	8	7.63	14.21	7.34	6.03	7.52	10.42	8.52	11.85	17.55	6.36	1.67	7.747	9.147	0.2397	0.737248
hsa-miR-409-3p	191.52	91.68	209.93	111.69	246.01	197.4	122.94	415.91	64.43	455.53	301.94	311.35	115.18	105.33	170.64	608.68	293.47	31.91	61.69	432.78	210.704	243.297	0.2075	0.737365
hsa-miR-18a-5p	38.16	29.94	17.31	22.34	48.43	25.14	32.16	22.96	42.99	30.88	34.59	24.42	33.24	22.16	20.07	24.18	33.04	70.3	31.8	0.93	31.031	29.473	-0.0743	0.73799
hsa-miR-2110	56.77	76.24	88.78	103.77	71.74	90.25	66.85	81.23	22.29	59.33	48.62	76.08	88.87	107.58	94.09	95.04	49.47	20.3	83.53	150.52	71.725	81.41	0.1827	0.738114
hsa-miR-224-3p	0.12	0	0	0	0.09	0.22	0	0	0	0.12	0.09	0.1	0	0	0	0.1	0.09	0	0	0	0.055	0.038	-0.5334	0.738257
hsa-miR-605-3p	0.24	0.28	0.09	0.41	0.26	0.11	0.87	0.12	0.09	0.12	0.98	0.2	0.1	0	0	0.69	0.65	0.53	0.32	0	0.259	0.347	0.422	0.73876
hsa-miR-106a-5p	150.5	152.49	121.6	127.44	221.23	229.69	239.97	186.18	485.06	264.25	212.02	169.85	271.04	166.93	208.69	110.7	257.16	577.01	169.82	11.89	217.841	215.511	-0.0155	0.74047
hsa-miR-346	0.24	0.09	0	0.1	0	0	0	0.12	0	0	0	0	0	0	0.11	0	0.09	0.09	0	0	0.055	0.029	-0.9234	0.741252
hsa-miR-3064-3p	0	0.19	0	0	0.09	0.11	0	0.12	0	0	0	0	0.1	0	0.11	0	0	0.09	0	0	0.051	0.03	-0.7655	0.741441
hsa-miR-6774-5p	0	0.09	0	0	0.09	0	0	0.12	0	0.23	0.09	0	0	0	0.11	0	0	0.09	0	0	0.053	0.029	-0.8699	0.742589
hsa-miR-548f-5p	0	0	0.18	0	0.09	0	0	0	0.09	0.12	0.18	0	0	0	0	0.1	0	0	0.11	0	0.048	0.039	-0.2996	0.743184
hsa-miR-6726-5p	0.12	0	0	0.1	0	0	0	0	0	0.12	0	0	0	0.2	0.11	0.1	0	0	0	0.19	0.034	0.06	0.8194	0.744569
hsa-miR-548av-5p	12.88	8.6	7.71	8.03	8.26	5.09	5.62	6.23	8.19	7.63	14.21	7.34	6.03	7.52	10.42	8.52	11.94	17.99	6.47	1.67	7.824	9.211	0.2355	0.744632
hsa-let-7f-1-3p	2.86	1.68	0.63	0.62	1.2	0.22	0.78	1	1.13	2.31	5.72	1.21	0.1	0.59	0.88	1.88	0.75	1.95	1.7	1.3	1.243	1.608	0.3714	0.744775
hsa-miR-6804-3p	0.12	0.28	0.27	0.1	0.09	0.22	0.29	0.12	0.09	0.12	0.09	0	0.2	0.1	0.22	0.1	0.28	0.09	0.32	0.19	0.17	0.159	-0.0965	0.747399
hsa-miR-3690	1.91	3.55	0.63	0.72	5.25	1.19	0.68	2.87	0.09	1.04	2.5	0.3	6.53	1.76	1.86	3.07	3.92	0	1.8	0.56	1.793	2.23	0.3147	0.747534
hsa-miR-3136-5p	0.24	0.65	0.63	0.1	1.12	1.08	1.65	1	0.38	0.93	0.63	0.5	1.1	0.78	1.32	0.3	0.65	0.89	0.95	0	0.778	0.712	-0.1279	0.748885
hsa-miR-5697	0.48	0	0.18	0.31	0	0	0	0.12	0.19	0.12	0.18	0.2	0	0	0.11	0.2	0.09	0.18	0.21	0	0.14	0.117	-0.2589	0.749309
hsa-miR-4500	0	0.19	0	0.51	0.26	1.41	0.58	0.62	0.19	0.35	0.45	0	0.5	0.68	0	0.5	0.56	0.62	0.32	0	0.411	0.363	-0.1792	0.751731
hsa-miR-6734-5p	1.31	3.74	5.02	2.68	2.75	5.42	3.2	4.62	1.69	3.01	2.06	3.72	4.02	6.83	5.26	3.27	2.15	1.15	4.13	0.74	3.344	3.333	-0.0048	0.751822
hsa-miR-4785	0	0.09	0.18	0.1	0.43	1.08	0.48	0.25	0	0.58	0.54	0	1	0.59	0.33	0.3	0.19	0	0.11	0	0.319	0.306	-0.06	0.753295
hsa-miR-4695-5p	0	0	0	0	0	0.22	0.1	0	0	0	0	0.1	0.1	0.1	0	0	0	0	0	0.19	0.032	0.049	0.6147	0.753415
hsa-miR-192-5p	1428.8	1029.05	752.9	933.59	658.8	282.67	458.72	358.01	590.5	423.38	575.99	876.97	227.05	363.83	363.21	696.38	586	1250.92	524.18	889.35	691.642	635.388	-0.1224	0.755119
hsa-miR-324-3p	15.38	20.3	22.51	14.41	59.87	70.53	46.5	63.14	11.38	60.71	56.49	15.68	48.5	51.64	57.57	28.64	46.02	22.96	48.76	1.86	38.473	37.812	-0.025	0.755336
hsa-miR-3614-5p	4.41	4.96	3.14	2.06	2.92	4.33	6.3	4.37	1.88	9.37	4.74	0.7	5.32	6.83	5.26	4.86	3.55	1.15	8.8	3.16	4.374	4.437	0.0206	0.756202
hsa-miR-4638-5p	0.6	0.28	0.36	0.21	0.26	0.65	0.19	0.37	0	0.23	0.45	0.2	0.4	0.2	0	1.09	0.19	0	0.11	1.3	0.315	0.394	0.3228	0.756489
hsa-miR-4802-3p	0	0.09	0	0	0.09	0	0	0	0.09	0	0.18	0.1	0	0	0	0	0	0.18	0	0	0.027	0.046	0.7687	0.757426
hsa-miR-6735-5p	0.24	0.56	0.63	0.62	0.69	0.76	0.29	1.62	0.19	1.16	0.98	0.6	0.8	0.59	1.21	0.59	1.21	0.44	0.21	1.3	0.676	0.793	0.2303	0.757513
hsa-miR-3191-5p	0.24	0.09	0.27	0.21	0.09	0	0.19	0	0	0.23	0.09	0.3	0.2	0	0.44	0.1	0.19	0	0.21	0.19	0.132	0.172	0.3819	0.758018
hsa-miR-5010-3p	88.61	112.17	106.8	140.72	92.3	131.31	151.52	126.16	25.58	129.06	63.37	128.14	201.65	120.66	140.7	91.77	83.26	22.52	159.96	69.13	110.423	108.116	-0.0305	0.758455
hsa-miR-522-5p	0	1.14	0	0	0.09	0	0	0	0.54	0	0	0	0	0	1.98	0	0.09	0	0	0	0.177	0.207	0.2259	0.758807
hsa-miR-518e-5p	0	1.14	0	0	0.09	0	0	0	0.54	0	0	0	0	0	1.98	0	0.09	0	0	0	0.177	0.207	0.2259	0.758928
hsa-miR-519c-5p	0	1.14	0	0	0.09	0	0	0	0.54	0	0	0	0	0	1.98	0	0.09	0	0	0	0.177	0.207	0.2259	0.759021
hsa-miR-519a-5p	0	1.14	0	0	0.09	0	0	0	0.54	0	0	0	0	0	1.98	0	0.09	0	0	0	0.177	0.207	0.2259	0.759133
hsa-miR-519b-5p	0	1.14	0	0	0.09	0	0	0	0.54	0	0	0	0	0	1.98	0	0.09	0	0	0	0.177	0.207	0.2259	0.759262
hsa-miR-523-5p	0	1.14	0	0	0.09	0	0	0	0.54	0	0	0	0	0	1.98	0	0.09	0	0	0	0.177	0.207	0.2259	0.759374
hsa-let-7g-3p	0.24	0.56	0.27	0.21	1.03	1.19	1.84	0.62	0.47	1.39	1.16	0.3	1.21	1.27	1.32	0.69	1.49	0.8	0.64	0.37	0.782	0.925	0.2423	0.759544
hsa-miR-4676-5p	0.12	0.28	0.45	0.31	0.09	0.33	0.29	0.5	0.09	0.69	0.27	0.1	0.3	0.49	0.33	0.3	0.37	0.27	0.53	0	0.315	0.296	-0.0898	0.760745
hsa-miR-3684	0.12	0.09	0	0	0.17	0	0.1	0	0.19	0.23	0.27	0	0.2	0.1	0.11	0	0.09	0.53	0	0	0.09	0.13	0.5305	0.760765
hsa-miR-1297	0.72	0.56	0.18	0.41	1.55	1.19	1.36	0.12	8.28	0.58	2.77	1.21	1.41	0.88	4.06	11.59	1.12	3.9	0.64	0	1.495	2.758	0.8835	0.760861
hsa-miR-1254	8.47	8.51	7.98	8.34	8.69	12.46	8.14	10.48	2.82	9.71	9.03	8.44	17.17	12.59	11.62	11.3	7.75	2.84	8.27	8.36	8.56	9.737	0.1859	0.761263
hsa-miR-374a-5p	127.84	102.06	46.27	76.49	99	32.4	94.46	53.41	443.21	32.38	118.34	47.34	16.27	36.7	44.96	44.2	158.96	874.25	33.71	2.23	110.752	137.696	0.3142	0.761449
hsa-miR-1238-3p	0.6	1.31	0.45	1.65	0.34	0.33	0.97	0.25	0.19	0.12	0.27	1.51	0.5	0.78	0.55	1.09	0.19	0.09	0.53	2.04	0.621	0.755	0.2819	0.76145
hsa-miR-4795-3p	0.24	0.47	0.09	0	0.26	0.11	0.39	0.37	0.28	0.12	0.36	0.4	0.3	0.2	0.33	0.2	0.19	0.62	0.32	0	0.233	0.292	0.3256	0.761634
hsa-miR-21-3p	3.34	2.43	1.79	1.75	7.66	9.21	4.65	7.11	4.04	10.99	19.31	2.61	5.32	3.61	7.24	4.96	6.07	6.91	6.36	2.79	5.297	6.518	0.2993	0.76168
hsa-miR-6891-5p	0.12	0	0	0	0	0	0.1	0	0	0.12	0	0	0	0	0	0.1	0.09	0	0.32	0	0.034	0.051	0.585	0.761972
hsa-miR-1277-3p	0	0	0.09	0.41	0.52	0.22	0.29	0	1.98	0	0.63	0	0	0.1	0.11	0.4	0.09	3.63	0.21	0	0.351	0.517	0.5587	0.763126
hsa-miR-6774-3p	0.24	0.37	0.09	0.31	0.52	0.43	0.39	0.37	0	0.12	1.25	0	0.1	0.49	0.11	0.2	0.19	0	0.32	0.19	0.284	0.285	0.0051	0.763339
hsa-miR-616-3p	0.12	0.37	0.63	0.21	0.34	0.22	0.19	0.37	0.47	0.23	0.54	0	0.3	0.29	0.99	0	0.09	0	0.32	2.04	0.315	0.457	0.5368	0.763365
hsa-miR-3679-3p	0	0	0	0	0.09	0.11	0	0.12	0	0	0.09	0	0	0	0	0	0.28	0	0.21	0	0.032	0.058	0.858	0.763709
hsa-miR-4479	0.6	0.47	0.9	0.51	2.24	1.63	1.16	0.87	0	1.16	1.61	0.2	1.61	1.56	1.75	1.29	1.03	0.53	1.8	0	0.954	1.138	0.2544	0.763737
hsa-let-7e-5p	234.34	167.36	174.68	135.99	107.43	538.37	202.77	324.19	78.45	210.59	358.43	108.14	626.73	196.51	306.18	229.02	227.38	115.51	198.54	156.46	217.417	252.29	0.2146	0.764366
hsa-miR-610	3.46	3.55	2.69	2.78	1.98	1.95	2.81	4.49	1.13	4.16	2.41	2.61	3.72	3.71	4.72	1.88	2.52	2.39	2.97	1.49	2.9	2.842	-0.0291	0.764484
hsa-miR-4522	0.12	0.09	0.09	0	0	0.11	0	0	0	0	0.18	0.1	0	0	0.11	0.2	0	0	0	0.19	0.041	0.078	0.9279	0.765994
hsa-miR-877-3p	1.31	1.4	1.26	1.24	1.38	1.73	1.74	0.87	0.09	2.08	1.97	0.7	3.41	1.07	1.97	1.49	0.93	0.71	2.33	0.74	1.31	1.532	0.2258	0.767168
hsa-miR-362-5p	34.35	27.6	25.02	9.68	49.89	52.11	57.55	38.56	23.8	56.43	57.56	64.82	63.87	36.22	48.25	27.95	35.28	29.61	52.26	6.69	37.499	42.251	0.1721	0.768494
hsa-miR-202-3p	0	0	0.18	0.1	0.09	0.11	0	0	0	0.12	0.09	0	0.1	0.2	0.11	0	0	0	0	0	0.06	0.05	-0.263	0.769099
hsa-miR-4488	0.12	0.19	0.27	0.21	0.17	0.22	0.1	0.12	0	0	0.09	0	0.2	0.1	0.44	0.3	0.19	0.09	0	0.56	0.14	0.197	0.4928	0.769116
hsa-miR-4999-3p	0.24	0	0.09	0	0.26	0	0.19	0	0.09	0.58	0.18	0.1	0	0	0.11	0	0.09	0.35	0.21	0	0.145	0.104	-0.4795	0.769906
hsa-miR-331-3p	23.97	22.26	23.23	17.09	52.38	63.49	72.76	64.39	8.47	63.03	93.05	49.14	71.5	37.1	52.09	32.8	48.72	17.38	55.33	13.19	41.107	47.03	0.1942	0.770092
hsa-miR-6819-5p	0	0.09	0	0.1	0	0.11	0	0.25	0	0.12	0.18	0	0	0	0	0.2	0.09	0	0	0	0.067	0.047	-0.5115	0.770627
hsa-miR-6832-5p	0	0	0	0	0.09	0	0.1	0.25	0	0	0.18	0	0.1	0.1	0.22	0	0.09	0	0	0	0.044	0.069	0.6491	0.771002
hsa-miR-3124-3p	0.12	0.09	0.09	0	0	0	0.19	0	0.09	0	0	0	0.2	0	0	0.1	0	0.09	0	0	0.058	0.039	-0.5726	0.771997
hsa-miR-4676-3p	0.95	1.03	1.35	0.82	1.29	1.52	1.36	2.62	0.19	1.16	4.83	0.7	2.11	0.88	1.32	0.59	1.68	0.89	1.27	0.74	1.229	1.501	0.2884	0.772472
hsa-miR-4777-3p	0.24	0	0	0	0.09	0	0	0.12	0	0	0.27	0.1	0	0	0.11	0.2	0.09	0	0	0	0.045	0.077	0.7749	0.772655
hsa-miR-548g-3p	0.24	0.09	0.36	0.31	0.17	0.11	0.19	0.25	1.97	0	0.09	0	0	0.1	0.22	0.3	0.19	3.37	0.53	0.19	0.369	0.499	0.4354	0.77268
hsa-miR-1185-2-3p	0	0.09	0.09	0.1	1.29	0.65	0	0.87	0.47	0.93	2.77	0.3	0.4	0.2	0.66	0.89	0.84	0.44	0.11	0	0.449	0.661	0.5579	0.773979
hsa-let-7a-5p	65338.5	68510.2	84861.6	76471	56853.2	122244	82650.6	93737.1	34491.3	83204.1	68242.9	52933.8	119817	105739	95680.1	66957.8	77182.6	50920.2	84526.2	52735.2	76836.2	77473.5	0.0119	0.774001
hsa-miR-193a-5p	22.3	22.55	20.98	20.69	16.34	21.34	21.6	30.45	1.69	23.36	17.79	7.24	29.83	32.02	27.75	29.83	19.51	6.65	26.39	6.13	20.13	20.314	0.0131	0.776225
hsa-miR-6875-3p	0	0.09	0	0	0	0.22	0	0	0	0	0	0.2	0.2	0	0	0	0.09	0	0	0	0.031	0.049	0.6605	0.776281
hsa-miR-4755-5p	6.32	7.39	6.55	7	9.46	9.75	11.92	8.61	0.94	11.91	5.54	10.55	13.46	7.22	8.22	6.84	6.16	2.13	13.46	12.45	7.985	8.603	0.1075	0.776578
hsa-miR-6736-5p	0	0.09	0	0	0.17	0.22	0.39	0.37	0	0.23	0.45	0	0.4	0.39	0.33	0.2	0.19	0	0	0	0.147	0.196	0.415	0.778056
hsa-miR-651-5p	14.07	7.95	8.61	13.28	18.41	5.53	8.82	7.36	13.92	3.24	8.94	15.78	4.92	12.01	13.05	23.19	8.21	26.42	5.62	0.37	10.119	11.851	0.2279	0.778566
hsa-miR-329-5p	0.12	0	0.27	0.1	0.09	0.54	0	0	0.09	0.12	0.27	0	0.3	0.1	0.22	0.3	0.19	0	0	0.56	0.133	0.194	0.5446	0.778669
hsa-miR-140-3p	3594.36	5034.75	4964.31	3114.32	6834.91	7155.42	4196.17	5138.62	2587.67	5258.28	7036.67	5188.05	6764.69	7269.96	6816.42	4500.39	4759.62	4216.38	4379.06	3044.9	4787.88	5397.61	0.1729	0.779482
hsa-miR-125a-3p	1.07	0.75	1.17	0.21	0.26	1.3	0.68	2.99	0.09	1.27	1.97	0.3	1	0.59	1.21	2.48	1.03	0	0.85	0.56	0.979	0.999	0.0292	0.781405
hsa-miR-6871-3p	0.12	0	0.09	0	0	0.11	0	0.12	0	0	0.36	0.1	0	0.2	0	0	0	0	0	0	0.044	0.066	0.585	0.781996
hsa-miR-190a-5p	4.05	3.09	5.92	11.63	6.02	11.92	11.63	5.37	21.63	5.9	5.01	4.02	9.94	11.71	17.88	21.5	3.17	31.03	6.78	0.93	8.716	11.197	0.3614	0.782728
hsa-miR-1289	0.83	1.31	0.72	1.13	1.89	1.08	1.55	1	0.38	0.93	1.07	2.61	1.51	0.68	1.32	0.69	1.77	0.53	0.74	1.11	1.082	1.203	0.1529	0.782898
hsa-miR-4497	0	0.56	0.54	0	0.26	0.54	0	0.37	0	0.12	0.27	0.3	0.3	0.2	0.55	0.79	0.19	0	0.11	0.37	0.239	0.308	0.3659	0.783196
hsa-miR-6895-3p	0	0	0.18	0	0	0.11	0.1	0	0	0.23	0	0	0	0	0.11	0	0.09	0	0.21	0	0.062	0.041	-0.5966	0.783479
hsa-miR-6770-3p	0.48	0.28	0.45	0.21	0.34	0.54	0.19	0.25	0	0.58	0.36	0.4	0.6	0.29	0.55	0.59	0.19	0	0.21	0.74	0.332	0.393	0.2433	0.787688
hsa-miR-500a-3p	114.96	106.55	96.04	59.09	233.28	206.72	179.13	141.13	71.2	177.98	175.1	119.5	208.88	122.61	112.52	78.79	179.96	151.68	170.13	21.56	138.608	134.073	-0.048	0.788271
hsa-miR-6894-3p	0.6	0.37	1.43	1.24	0.6	0.65	0.78	1.12	0.47	1.39	0.98	0.5	1.21	1.07	0.88	1.09	0.47	0.18	1.27	1.3	0.865	0.895	0.0492	0.788757
hsa-miR-548aj-3p	0.24	0.18	0	0	0	0	0.2	0	0.38	0	0	0	0	0	0.22	0	0.18	0.88	0	0	0.1	0.128	0.3561	0.789383
hsa-miR-4461	0	0.09	0	0.1	0	0	0	0	0.09	0	0.18	0	0.1	0	0	0	0	0	0.11	0.37	0.028	0.076	1.4406	0.789497
hsa-miR-4799-5p	0	0.28	0.18	0	0.34	0	0.78	0.87	0	0.23	0.54	0	0.1	0.2	0.33	0.3	0.37	0	0.74	0	0.268	0.258	-0.0549	0.790397
hsa-miR-30e-5p	1722.41	980.87	462.62	684.57	1893.38	863.62	983.12	883.6	2089.81	1019.18	1909.42	1539.47	625.22	837.57	1048.17	938.19	968.05	2603.78	1033.73	162.41	1158.32	1166.6	0.0103	0.791159
hsa-miR-3155a	0.12	0	0	0	0.17	0	0.19	0.12	0	0.12	0.27	0	0.1	0	0	0.1	0.19	0	0	0	0.072	0.066	-0.1255	0.792073
hsa-miR-3939	0	0.28	1.52	0.82	1.12	0.76	0.87	1.12	0.38	0.35	0.63	0.3	1	1.46	0.77	1.39	1.03	0.27	0.64	0	0.722	0.749	0.053	0.793199
hsa-miR-30d-5p	14797.2	10412	5607.45	6707.63	13769.5	11368.6	7852.34	9316.27	4449.95	9622.61	13952	13555	9474.96	8362.71	11045	8040.78	8963.48	5547.17	8649.15	6207.43	9390.36	9379.77	-0.0016	0.793925
hsa-miR-5009-5p	2.98	2.71	2.6	3.71	0.34	1.19	1.26	1.37	2.16	1.5	0.63	2.01	1.21	1.46	1.43	1.09	0.65	0.62	1.27	12.64	1.982	2.301	0.2153	0.794652
hsa-miR-4792	0	0	0	0.1	0	0.33	0.1	0	0	0	0.09	0.1	0	0.2	0.11	0.1	0.09	0	0.11	0	0.053	0.08	0.594	0.794998
hsa-miR-17-5p	1697.48	1440.95	1018.78	1076.57	1783.8	1453.55	1722.49	1439.51	2582.87	1774.11	2209.93	1660.98	1430.9	1176.11	1412.15	815.6	1889.72	3686.27	1579.22	118.18	1599.01	1597.91	-0.001	0.79566
hsa-miR-132-3p	15.5	13.66	9.6	12.04	13.25	19.83	15.11	15.47	8.56	21.28	27.53	10.55	14.76	20.21	19.63	22	14.47	8.78	18.76	11.89	14.43	16.858	0.2244	0.797023
hsa-miR-6857-3p	1.19	1.31	1.79	1.54	1.63	1.84	2.91	2.62	0.38	2.08	1.25	2.61	3.31	1.76	1.32	3.07	1.4	0.53	2.44	1.49	1.729	1.918	0.1497	0.797101
hsa-miR-6718-5p	1.31	0.75	0.27	0.41	0.26	0.65	0.48	1	0.09	0.69	1.61	0.2	0.4	0.59	0.66	0.5	0.19	0.35	0.64	0.74	0.591	0.588	-0.0073	0.7973
hsa-miR-194-3p	1.55	1.12	2.24	1.34	1.12	2.06	0.68	1.75	0.56	1.04	3.22	0.8	2.61	1.17	1.97	1.19	0.84	0.27	2.01	2.42	1.346	1.65	0.2938	0.797407
hsa-miR-1914-5p	0.12	0.37	0.18	0	0.34	0.43	0.48	0.25	0	0.93	1.25	0.2	0.1	0.1	0.22	0.69	0.37	0.09	0.53	0.37	0.31	0.392	0.3386	0.797728
hsa-miR-6777-3p	0.12	0.19	0.09	0	0.69	0.33	0.19	0.25	0.09	0.12	0.27	0.4	0.3	0.29	0.11	0.3	0	0	0.21	0	0.207	0.188	-0.1389	0.79792
hsa-miR-190b	5.01	1.68	4.21	3.4	1.89	5.42	5.13	5.86	3.2	3.93	5.01	1.61	5.42	5.56	8.44	4.06	4.2	5.85	5.19	0.74	3.973	4.608	0.2139	0.799437
hsa-miR-370-3p	111.98	64.74	137.83	76.59	304.07	237.82	101.14	357.76	62.93	339.42	267.44	252.96	163.89	108.84	169.54	333.87	251.74	28.01	64.24	350.46	179.428	199.099	0.1501	0.800486
hsa-miR-4772-3p	5.96	2.99	3.23	0.82	5.25	5.85	5.23	3.99	1.5	13.65	17.52	2.11	2.51	5.76	7.68	3.86	3.27	1.86	7.84	0.19	4.847	5.26	0.118	0.800721
hsa-miR-4786-5p	0.24	0.09	0.18	0	0.17	0	0.39	0.25	0.09	0.12	0.36	0.2	0	0.1	0	0.1	0.09	0.18	0	0.93	0.153	0.196	0.3573	0.80113
hsa-miR-186-3p	0.12	0	0	0	0	0	0	0	0.09	0	0.18	0	0	0	0	0	0	0.27	0	0	0.021	0.045	1.0995	0.801134
hsa-miR-4687-3p	0	0.09	0.18	0	0	0.22	0	0.25	0	0	0.27	0.1	0	0.1	0.11	0	0	0	0	0	0.074	0.058	-0.3515	0.80167
hsa-miR-4707-3p	0	0.65	0.81	0	0.09	0	0.1	2.12	0	0	0	0	1.41	0	1.43	0	0	0.35	1.27	0.19	0.377	0.465	0.3027	0.802046
hsa-miR-526b-5p	0	0.09	0	0	0	0	0	0.25	0	0	0	0.2	0	0	0	0	0.28	0	0	0	0.034	0.048	0.4975	0.802856
hsa-miR-4536-5p	0	0.28	0	0	0	0.22	0	0	0	0	0.18	0	0	0	0	0.3	0	0	0	0	0.05	0.048	-0.0589	0.804083
hsa-miR-2115-5p	1.67	0.75	0.54	0.31	1.2	1.3	1.26	2	0.94	1.73	1.7	0.1	1.81	0.88	1.43	1.98	2.24	0.53	1.59	0	1.17	1.226	0.0675	0.804824
hsa-miR-6767-5p	0.24	0.94	0.18	0.31	0.52	0.33	0.29	0.5	0.09	0.46	0.36	0.5	0.5	0.68	0.77	0.59	0.28	0.27	0.42	0.19	0.386	0.456	0.2404	0.805759
hsa-miR-545-5p	0	0	0.18	0	0	0	0.1	0	0.19	0	0	0	0	0	0.11	0.1	0	0.18	0	0	0.047	0.039	-0.2692	0.806864
hsa-miR-130a-3p	46.87	36.39	26.09	37.16	75.61	51.9	61.71	46.92	54.84	87.2	80.09	49.04	41.98	53.4	77.42	39.05	89.52	63.03	44.63	9.66	52.469	54.782	0.0622	0.807237
hsa-miR-27a-3p	1494.15	1124.84	702.05	767.85	3443.22	2788.79	2463.51	2413.33	1036.25	3483.81	4315.46	1763.69	1960.53	1859.25	2040.31	2981.66	2741.65	1302.42	3644.46	336.15	1971.78	2294.56	0.2187	0.80828
hsa-miR-219a-5p	0	0	0	0	0	0	0.2	0	0	0	0	0	0	0	0	0	0	0.27	0	0	0.02	0.027	0.433	0.808474
hsa-miR-21-5p	9293.71	4586.93	3142.24	4934.76	3664.62	3610.37	4129.03	3970.39	8082.33	3628.83	7305.81	3099.44	2164.68	4565.05	7094.53	15513.2	4386.72	10350.4	3276.74	2937.68	4904.32	6069.43	0.3075	0.808849
hsa-miR-5193	2.03	2.53	1.7	1.24	2.06	2.6	4.17	4.37	0.38	4.63	7.69	1.31	1.81	0.98	3.29	3.57	3.36	0.62	3.29	4.65	2.571	3.057	0.2498	0.809194
hsa-miR-92a-2-5p	0.24	0.37	0	0	0	0	0	0	0	0	0	0	0.1	0.1	0	0.2	0	0	0.11	0	0.061	0.051	-0.2583	0.811235
hsa-miR-4677-3p	2.86	2.06	1.08	1.34	1.81	0.65	1.74	1.87	1.98	2.31	2.86	2.11	0.4	0.59	0.55	1.29	1.4	4.17	0.95	2.04	1.77	1.636	-0.1136	0.811943
hsa-miR-92b-3p	130.23	151.36	164.01	138.87	210.14	255.48	270.77	237.22	43.46	240.08	188.15	142.41	302.57	248.24	249.16	190.27	209.83	83.15	237.98	170.4	184.162	202.216	0.1349	0.812662
hsa-miR-135b-5p	0	0	0.09	0	0	0.22	0.19	0	0.09	0	0.09	0	0	0.2	0	0.1	0.09	0.18	0.21	0	0.059	0.087	0.5603	0.815035
hsa-miR-590-5p	0	0	0	0.1	0	0	0	0	0.19	0	0.09	0	0	0	0	0.1	0.09	0.27	0	0	0.029	0.055	0.9234	0.815267
hsa-miR-3202	0.36	0.28	0.36	0.21	0.26	0.11	0.1	0.37	0.38	0.12	0.09	0.3	0.3	0.29	0.11	0.4	0.28	0.27	0.11	0.19	0.255	0.234	-0.124	0.817139
hsa-miR-1277-5p	1.07	0	0.27	0.41	0.95	0.22	0.68	0.5	2.92	0.69	2.15	0.3	0.6	0.29	1.75	1.68	0.28	3.01	0.74	0.19	0.771	1.099	0.5114	0.817224
hsa-miR-580-3p	0.24	0.19	0.27	0.1	0	0.22	0	0.12	4.7	0	0.18	0.2	0.1	0.39	0.33	0.3	0	4.61	0	0	0.584	0.611	0.0652	0.817972
hsa-miR-598-3p	10.61	8.98	9.95	8.03	12.21	12.13	11.92	11.11	11.57	8.21	16.09	5.53	5.22	11.81	13.27	19.72	14.75	25.62	8.8	0.56	10.472	12.137	0.2129	0.818462
hsa-miR-424-5p	4.89	4.68	1.79	1.03	4.64	3.36	4.17	3.49	14.67	2.2	8.31	1.21	1	2.34	4.17	3.27	3.92	19.95	2.01	0.19	4.492	4.637	0.0458	0.819378
hsa-miR-15b-3p	121.04	82.6	83.22	57.65	89.28	45.72	77.99	62.77	20.22	66.03	201.38	42.81	27.52	61.11	86.53	139.83	94.56	52.92	55.02	11.71	70.652	77.339	0.1305	0.81959
hsa-miR-143-5p	1.67	0.47	1.26	0.93	2.58	3.79	2.62	4.24	1.88	3.93	7.24	0.2	3.31	2.34	1.97	2.77	2.89	4.17	2.86	0.19	2.337	2.794	0.2577	0.819766
hsa-miR-548f-3p	1.79	1.4	1.44	2.27	1.03	1.3	0.97	0.75	5.36	0	0.45	0.3	0.4	1.08	1.54	1.69	0.56	8.51	0.85	0.19	1.631	1.557	-0.067	0.820571
hsa-miR-145-5p	26.24	25.35	16.23	11.12	30.97	56.23	43.21	75	19.47	86.97	91.98	16.98	99.82	47.05	59.11	43.41	32.02	20.74	51.2	5.2	39.079	46.751	0.2586	0.82071
hsa-miR-548w	0.72	0.09	0.36	0	0.43	0.33	0.39	0.5	0	0.69	1.88	0.1	0.3	0.1	0.33	0.2	0.56	0.35	0.64	0	0.351	0.446	0.3456	0.821064
hsa-miR-505-3p	72.75	37.14	41.61	15.96	34.75	76.82	60.45	95.46	14.86	106.28	184.13	25.73	80.84	44.03	85.21	44.2	74.39	28.99	93.18	8.36	55.608	66.906	0.2668	0.821522
hsa-miR-548aq-3p	1.43	1.12	0.9	0.51	0.43	0.11	0.39	0.5	2.45	0.35	0.8	0.3	0.1	0.49	0.55	0.5	0.65	3.55	0.64	0.37	0.819	0.795	-0.0429	0.822213
hsa-miR-28-5p	90.63	40.69	27.89	27.38	58.58	27.41	64.33	46.17	27.56	44.18	188.06	55.07	23.8	23.82	40.03	54.41	72.53	35.37	41.76	20.07	45.482	55.492	0.287	0.823708
hsa-miR-3605-5p	1.07	1.87	0.63	2.57	1.29	1.52	0.48	1	0.19	0.69	1.7	0.8	1.61	1.27	1.32	2.08	1.31	0.71	0.74	1.86	1.131	1.34	0.2446	0.824246
hsa-let-7b-5p	7098.69	10018.6	13492.3	11739.7	10451.7	22374.9	13881.9	16883.2	4367.93	17290	9680.92	8914.72	20385.2	23503	18152.8	12072.2	12417.2	5504.35	15256.3	4267.25	12759.9	13015.4	0.0286	0.825268
hsa-miR-93-5p	2951.82	3157.02	2905.95	2124.84	5066.25	6101.44	5105.75	5133	2779.45	6097.05	5422.84	3526.27	5670.8	4990.18	5602.87	2622.42	4509.46	4335.88	4882.15	336.9	4142.26	4189.98	0.0165	0.827323
hsa-miR-218-5p	1.44	1.12	0.54	1.02	0.68	2.82	1.36	0.24	2.26	3.94	3.76	1.8	1.4	1.66	0.88	2.58	1.12	2.3	1.48	1.86	1.542	1.884	0.289	0.827734
hsa-miR-487a-3p	0.36	0.19	0.18	0	1.63	0.22	0.48	0.87	0.38	1.27	1.88	0.8	0	0	0.88	0.2	1.59	0.18	0.11	0	0.558	0.564	0.0154	0.830131
hsa-miR-6829-5p	0	0.09	0	0.21	0.17	0.11	0	0	0	0	0.09	0	0.1	0.39	0	0	0.09	0	0	0.19	0.058	0.086	0.5683	0.830498
hsa-miR-3135a	3.34	7.76	3.86	2.68	4.73	4.33	2.33	1.75	0	3.47	1.97	4.02	0	10.35	3.4	4.66	2.33	0.53	3.71	1.86	3.425	3.283	-0.0611	0.831057
hsa-miR-502-3p	100.89	96.54	86.98	54.15	231.38	189.17	184.55	129.53	68.1	174.86	151.86	160.1	191.5	118.12	101.88	76.51	174.64	127.03	162.08	11.52	131.615	127.524	-0.0456	0.831906
hsa-miR-6802-3p	3.1	3.09	4.48	2.99	1.72	3.03	2.91	2.62	0.47	2.31	2.32	2.81	4.72	2.34	4.06	2.68	2.33	0.8	3.92	1.3	2.672	2.728	0.0299	0.832297
hsa-miR-450b-5p	6.44	3.09	1.61	1.44	1.29	2.82	2.23	2.12	14.39	0.93	2.5	0.6	0.8	2.93	2.74	5.55	2.89	23.76	1.91	0.56	3.636	4.424	0.283	0.832745
hsa-miR-487a-5p	0.72	0	0.54	0.62	1.38	0.54	0.68	1.25	0.19	1.85	2.5	0.8	0.8	0.49	0.77	1.49	0.84	0	0.32	0.19	0.777	0.82	0.0777	0.833013
hsa-miR-4726-5p	0.12	0.09	0.09	0	0	0.11	0.19	0	0.09	0.12	0.09	0.1	0.2	0	0	0.3	0	0.09	0.32	0	0.081	0.11	0.4415	0.833295
hsa-miR-7850-5p	0.24	0.19	0.09	0	0.17	0.65	0.29	0.25	0	0.35	0.27	0	1	0.2	0.11	0.1	0.19	0.27	0.32	0	0.223	0.246	0.1416	0.833566
hsa-miR-34c-5p	1.31	0.65	0	0.41	0.77	5.2	0.39	1.62	0.19	1.04	3.04	0.1	0.4	1.46	0.99	0.99	0.47	1.33	1.27	0.93	1.158	1.098	-0.0768	0.833892
hsa-miR-6820-5p	0	0	0	0.1	0.09	0.11	0	0.12	0.09	0.23	0.09	0	0.2	0.29	0	0.1	0.09	0	0.21	0.19	0.074	0.117	0.6609	0.834087
hsa-miR-548ap-3p	1.9	0.09	0.27	0.52	0.18	0.22	1.36	1.12	4.33	0.47	0.81	0.2	0	0.3	0.99	0.4	1.87	5.23	0.63	0	1.046	1.043	-0.0041	0.835327
hsa-miR-544b	1.07	0.19	0	0.31	0	0	0	0	0	0.46	1.52	0	0.7	0	0	0	0	0	0	0	0.203	0.222	0.1291	0.836267
hsa-miR-552-5p	0	0	0.09	0.21	0.34	0	0.1	0	0.09	0.12	0.27	0	0.2	0.2	0.11	0	0.09	0.09	0	0	0.095	0.096	0.0151	0.836962
hsa-miR-7847-3p	0	0.09	0	0.1	0.17	0.33	0	0	0.09	0	0.09	0	0.2	0	0.11	0.3	0.09	0.09	0.21	0	0.078	0.109	0.4828	0.837305
hsa-miR-223-3p	740.46	532.58	406.85	111.49	458.72	526.99	898.93	1502.65	1067.2	1808.35	3127.46	186.53	496.78	514.55	731.68	311.18	1416.56	1222.82	1040.73	12.08	805.422	906.037	0.1698	0.838719
hsa-miR-29c-3p	16.46	16.84	8.07	14.41	21.42	8.78	20.25	12.73	25.11	8.9	26.19	13.97	3.92	12.2	6.8	13.38	27.91	57.09	8.16	1.67	15.297	17.129	0.1632	0.838856
hsa-miR-3122	0.24	0	0.81	0.1	0.26	0.54	0.19	0.12	0.09	0.12	0.18	0.1	0.2	0.2	0.55	0.59	0.09	0.09	0	0.56	0.247	0.256	0.0516	0.838998
hsa-miR-641	14.79	7.76	4.3	5.56	7.66	13.11	27.13	13.98	6.11	16.31	14.39	15.78	9.94	6.15	12.06	10.41	10.45	5.14	14.84	15.05	11.671	11.421	-0.0312	0.83971
hsa-miR-328-3p	593.54	401.89	368.29	388.61	430.17	641.08	763.88	960.59	33.58	695.03	1213.12	519.09	617.89	498.54	978.43	619.38	622.03	58.95	787.91	208.87	527.666	612.421	0.2149	0.839801
hsa-miR-6861-5p	0	0.09	0.09	0	0.26	0.43	0.1	0.12	0	0	0.36	0.1	0	0.1	0.11	0.1	0	0	0.21	0	0.109	0.098	-0.1535	0.840468
hsa-miR-199b-5p	39.59	24.79	8.43	8.96	17.2	28.17	13.76	27.08	39.22	26.37	80.36	5.93	12.65	16.01	18.86	23.98	26.6	51.5	22.68	2.79	23.357	26.136	0.1622	0.842419
hsa-miR-3149	0.36	0.47	0.72	0.82	0.09	0.43	0.29	0.12	0.28	0.23	0.27	0	0.2	0.39	0.22	0.69	0.28	0.09	0.21	1.67	0.381	0.402	0.0774	0.843764
hsa-miR-181b-5p	622.39	409.18	253.24	220.4	317.39	375.53	381.8	472.06	148.8	394.35	1335.49	256.98	402.08	302.23	338.1	511.96	356.38	164.26	253.87	148.47	359.514	406.982	0.1789	0.844008
hsa-miR-1256	0	0.19	0.09	0.1	0.09	0	0.1	0.25	0	0.35	0.27	0.1	0	0.1	0.11	0	0	0.18	0.21	0	0.117	0.097	-0.2705	0.844596
hsa-miR-3620-3p	0.12	0.37	0.36	0.1	0.34	0.43	0.39	0.12	0.09	0.46	0.09	0	0.3	0.68	0.44	0.59	0	0	0.53	0.19	0.278	0.282	0.0206	0.846977
hsa-miR-337-3p	1.79	0.84	1.08	1.03	1.38	0.43	0.78	2.25	1.32	1.5	2.32	2.21	0.1	0.2	0.44	1.68	4.11	1.33	0.11	0	1.24	1.25	0.0116	0.848041
hsa-miR-4701-5p	0	0.19	0	0.21	0.17	0	0.1	0	0	0.23	0.09	0	0.1	0	0.22	0.5	0	0	0	0	0.09	0.091	0.0159	0.848063
hsa-miR-139-5p	135.24	77.83	108.68	58.68	146.23	134.13	418.32	243.08	50.13	197.87	373.89	46.83	56.94	168.88	168.12	286.01	184.26	20.12	165.89	339.87	157.019	181.081	0.2057	0.84834
hsa-miR-6721-5p	0.6	1.4	2.15	1.03	0.86	1.63	0.68	2.37	0.56	0.81	1.16	0.6	1.1	2.15	2.08	1.59	1.12	0.27	2.23	0.56	1.209	1.286	0.0891	0.849256
hsa-miR-340-3p	186.64	93.74	52.28	69.18	60.13	58.61	99.59	83.98	46.65	100.03	110.84	98.89	48.6	50.96	84	188.29	100.62	33.07	115.22	121.16	85.083	95.165	0.1616	0.855267
hsa-miR-378a-5p	12.76	15.16	10.94	9.47	28.99	30.99	25.77	19.47	3.01	24.63	40.94	18.39	32.74	19.33	26.1	17.54	20.82	7.18	20.35	2.79	18.119	20.618	0.1864	0.85576
hsa-miR-222-5p	0.24	0.09	0.09	0.1	0.17	0.11	0	0.12	0.19	0	0.54	0	0	0	0.11	0.2	0.28	0	0.11	0	0.111	0.124	0.1598	0.856049
hsa-miR-193a-3p	0	0.09	0.18	0	0.17	0.11	0.19	0.12	0.19	0.23	0.09	0.2	0.2	0.2	0	0.1	0	0.18	0.11	0	0.128	0.108	-0.2451	0.8564
hsa-let-7i-5p	66922.4	69175.9	70902	89989.4	51374.5	83906.4	71933.8	79449.2	33005.4	62747.2	38680.6	60964.2	77764.1	84165.2	80075.1	76207	51501.1	35067.2	79798.5	102841	67940.6	68706.4	0.0162	0.856485
hsa-miR-6882-3p	0.12	0.28	0.09	0.1	0.26	0.11	0.48	0.62	0.19	0.46	0.54	0.6	0.1	0.2	0.22	0	0.56	0	0.85	0.19	0.271	0.326	0.2666	0.858497
hsa-miR-4646-5p	0.12	0.28	0.99	0.82	0.52	0.33	0.29	0.87	0.09	0.69	0.18	0.4	0.8	0.88	1.54	0.69	0.37	0.09	0.64	0.37	0.5	0.596	0.2534	0.860755
hsa-miR-548an	0	0	0.18	0.21	0.17	0.11	0.29	0	0	0.12	0.18	0	0.1	0.1	0.44	0.1	0.28	0.18	0.11	0	0.108	0.149	0.4643	0.861341
hsa-miR-6753-3p	0.95	0.56	0.63	0.31	0.43	0.33	0.78	0.62	0	0.35	0	0.4	0.6	0.29	0.11	0.5	0.37	0	0.32	1.86	0.496	0.445	-0.1565	0.861691
hsa-miR-98-5p	465.57	393.28	692.37	588.32	301.06	670.11	641.43	580.5	444.34	400.6	418.68	268.14	742.62	692.51	728.61	657.83	455.23	662.2	522.49	294.16	517.758	544.247	0.072	0.861976
hsa-miR-6855-3p	0.72	1.4	0.72	1.44	1.12	0.98	1.36	0.5	0.38	0.58	0.8	1.01	0.7	1.37	0.88	0.99	1.31	0.27	1.06	1.11	0.92	0.95	0.0463	0.862674
hsa-miR-493-3p	28.14	14.31	37.3	19.56	43.61	26.54	17.63	55.4	18.62	69.73	40.94	37.99	18.88	19.33	27.96	98.11	28.56	3.28	9.96	88.08	33.084	37.309	0.1734	0.863756
hsa-miR-99a-5p	343.22	178.87	217.73	247.27	306.73	130.34	197.44	169.21	83.34	144.79	385.69	300.8	158.46	101.82	178.53	286.3	206.19	78.01	153.7	256.25	201.894	210.575	0.0607	0.864543
hsa-miR-4683	0.12	0.09	0.18	0.1	0	0.11	0.29	0.25	0.09	0.23	0.54	0.1	0.2	0.2	0.11	0.2	0.09	0.09	0	0	0.146	0.153	0.0676	0.865007
hsa-miR-570-3p	0.12	0	0	0.21	0.17	0.11	0	0	0.94	0.12	0.18	0	0	0	0	0.3	0.28	1.42	0.11	0	0.167	0.229	0.4555	0.865823
hsa-miR-552-3p	0	0	0	0.21	0.43	0.33	0	0	0	0	0.27	0	0	0	0.11	0.4	0	0	0.11	0	0.097	0.089	-0.1242	0.866244
hsa-miR-361-5p	54.38	38.73	32.19	23.88	51.95	50.49	56.19	54.66	44.3	50.65	160.18	37.08	42.68	42.37	57.57	44.2	61.61	67.9	37.74	2.97	45.742	55.43	0.2771	0.866289
hsa-miR-6879-3p	0	0	0.18	0	0.26	0.22	0.29	0.12	0	0.35	0	0.1	0	0.29	0.22	0.3	0	0.09	0	0.19	0.142	0.119	-0.2549	0.866595
hsa-miR-6514-5p	1.43	1.96	1.7	0.93	1.55	1.3	1.36	1.37	0.75	0.81	1.43	1.11	1	0.88	1.43	1.68	1.21	0.98	1.27	2.6	1.316	1.359	0.0464	0.866982
hsa-miR-140-5p	140.96	82.14	42.95	49.52	109.24	72.81	89.61	62.02	107.51	74.36	200.85	89.14	72.6	60.62	97.16	119.42	109.86	96.8	77.59	4.46	83.112	92.85	0.1598	0.867239
hsa-miR-6511a-5p	0.24	0.18	0.18	0.42	0.68	0	0	0.24	0.18	0	0.36	0.2	0.4	0	0	0	0	0	0	1.12	0.212	0.208	-0.0275	0.868156
hsa-miR-369-3p	2.03	0.65	0.9	0.41	3.61	2.17	1.36	4.74	13.73	5.09	7.87	0.9	0.3	0.68	1.1	4.06	7.56	20.83	0.64	0	3.469	4.394	0.341	0.870774
hsa-miR-3940-3p	7.99	10.57	19.1	11.84	22.02	31.53	26.16	16.1	3.1	18.5	19.93	11.96	34.65	21.09	22.26	18.83	18.3	4.52	30.63	5.02	16.691	18.719	0.1654	0.871115
hsa-miR-17-3p	12.28	16	14.53	9.26	40.26	52.76	47.86	27.33	12.32	42.33	44.6	26.13	58.95	23.92	35.31	14.96	26.23	21.98	46.53	4.09	27.493	30.27	0.1388	0.871475
hsa-miR-6818-5p	0.36	0.65	0.36	0.1	0.34	0.65	0.97	0.37	0.09	0.23	1.16	0.2	0.4	0.29	0.66	0.69	0.37	0.44	0.11	0	0.412	0.432	0.0684	0.873893
hsa-miR-4687-5p	0.12	0.19	0.09	0	0.09	0.33	0.1	0.25	0	0.23	0.63	0	0.2	0	0.33	0.2	0.28	0	0.21	0	0.14	0.185	0.4021	0.874771
hsa-miR-193b-5p	0	0.09	0.18	0.1	0.17	0.11	0.19	0.5	0	0.23	0.36	0	0	0.2	0.22	0.4	0	0.09	0.32	0	0.157	0.159	0.0183	0.875372
hsa-miR-425-3p	95.88	95.61	76.31	61.87	195.86	260.35	224.76	213.26	45.99	252.22	328.84	114.17	232.58	181.77	237.31	173.43	171	76.95	191.86	23.41	152.211	173.132	0.1858	0.876745
hsa-miR-548am-5p	2.49	2.15	2.16	2.58	1.72	3.57	2.04	2.25	1.5	3.94	3.93	0.9	3.3	4.2	7.01	5.04	3.09	0.54	2.55	0	2.44	3.056	0.3248	0.877439
hsa-miR-548c-5p	2.49	2.15	2.16	2.58	1.72	3.57	2.04	2.25	1.5	3.94	3.93	0.9	3.3	4.2	7.01	5.04	3.09	0.54	2.55	0	2.44	3.056	0.3248	0.877441
hsa-miR-548o-5p	2.49	2.15	2.16	2.58	1.72	3.57	2.04	2.25	1.5	3.94	3.93	0.9	3.3	4.2	7.01	5.04	3.09	0.54	2.55	0	2.44	3.056	0.3248	0.877453
hsa-miR-4724-5p	0.36	0.37	0	0	0.17	0	0.29	0.12	0	0	0.18	0	0.4	0.29	0	0	0.09	0	0.21	0	0.131	0.117	-0.1631	0.877582
hsa-miR-431-3p	0	0.19	0.45	0	0.86	1.52	0.1	0.75	0.09	1.5	1.43	0.3	0.8	0.29	0.77	1.19	0.37	0.09	0.11	0.37	0.546	0.572	0.0671	0.878363
hsa-miR-548aa	2.38	0.28	0.45	0.52	0.34	0.22	1.55	1.37	5.46	1.04	1.78	0.5	0	0.39	1.43	0.4	2.42	6.74	0.63	0	1.361	1.429	0.0703	0.878812
hsa-miR-548t-3p	2.38	0.28	0.45	0.52	0.34	0.22	1.55	1.37	5.46	1.04	1.78	0.5	0	0.39	1.43	0.4	2.42	6.74	0.63	0	1.361	1.429	0.0703	0.878838
hsa-miR-6758-5p	0.24	0.19	0.18	0.1	0.17	0.11	0	0.25	0	0	0.09	0	0.1	0.59	0.22	0.1	0.09	0	0	0.37	0.124	0.156	0.3312	0.878872
hsa-miR-769-3p	0.72	0.75	1.17	1.34	2.24	4.44	3.29	3.12	0.47	3.47	4.56	0.6	4.02	3.12	2.96	1.49	2.89	1.15	3.18	0.19	2.101	2.416	0.2015	0.878978
hsa-miR-6866-5p	3.1	3.09	1.52	1.85	2.32	1.52	2.13	1.5	0.47	1.04	1.43	2.21	1.41	0.68	1.21	0.99	1.03	0.53	2.12	5.95	1.854	1.756	-0.0783	0.879237
hsa-miR-200a-5p	0.72	0.56	0.18	2.06	0.26	0.11	0.19	0.12	0.09	0.12	0.18	0.4	0.1	0.88	0.33	0.69	0.37	0	0.21	1.3	0.441	0.446	0.0163	0.880135
hsa-miR-450a-1-3p	0.36	0	0	0.31	0	0	0.19	0.12	0.28	0	0.09	0.1	0	0.29	0.22	0.1	0.19	0.18	0.11	0	0.126	0.128	0.0227	0.880466
hsa-miR-20a-5p	1845.48	1450.21	1028.28	1447.89	1619.34	1386.27	1296.42	1357.15	7412.06	1329.92	1559.57	2082.28	1091.18	1348.31	1608.89	1398.52	1734.3	9151.26	1277.75	97.74	2017.3	2134.98	0.0818	0.881056
hsa-miR-1343-3p	3.1	3.93	2.69	2.37	2.75	3.14	4.84	3.37	0.28	7.75	5.63	3.82	4.72	3.61	6.14	4.36	2.05	0.89	2.23	2.04	3.422	3.549	0.0526	0.881108
hsa-miR-4301	0.36	0.56	0.36	0.21	2.67	1.3	1.65	2.12	0	0.69	1.07	0.4	0.9	1.95	2.19	1.98	1.59	0.44	0.53	0	0.992	1.105	0.1556	0.881863
hsa-miR-943	0.72	1.68	0.9	1.75	1.03	0.54	0.58	0.75	0	0.35	1.16	0.7	0.8	0.59	0.55	1.29	1.12	0	0.85	1.67	0.83	0.873	0.0729	0.882527
hsa-miR-29b-3p	97.32	109.64	56.86	78.24	110.1	49.18	91.64	71.62	228.76	46.96	156.78	61.1	12.46	58.18	51.32	72.54	155.88	365.24	39.22	5.94	94.032	97.866	0.0577	0.882835
hsa-miR-181c-5p	4.53	2.34	2.06	1.13	11.44	7.37	6.49	4.87	1.6	10.87	18.23	4.72	7.03	4.88	7.35	3.96	5.88	1.77	7.74	0.56	5.27	6.212	0.2373	0.883764
hsa-miR-548au-5p	4.04	3.18	3.24	3.61	2.67	4.98	4.66	4.37	3	5.44	5.45	1.1	5.01	5.76	9.2	6.43	5.24	3.55	4.88	0.19	3.919	4.681	0.2563	0.88382
hsa-miR-4657	0	0.19	0.18	0.31	0.17	0.11	0.29	0.12	0.19	0.12	0.18	0	0.2	0.59	0	0.2	0.09	0	0.32	0.19	0.168	0.177	0.0753	0.890966
hsa-miR-6775-3p	0.48	1.4	0.45	0.31	1.12	1.41	1.26	0.87	0.19	0.93	0.72	0.5	1.1	1.85	0.99	0.79	0.37	0.27	0.85	0.93	0.842	0.837	-0.0086	0.891928
hsa-miR-6853-3p	0.36	0.47	0.18	0.21	0	0.43	0.19	0.12	0	0.12	0.45	0.2	0.2	0.1	0.44	0.1	0.28	0.18	0.11	0	0.208	0.206	-0.0139	0.893523
hsa-miR-3180	0.96	1.5	0.9	1.24	2.06	0.66	0.38	0	0	0	0.72	0.6	1.6	0.98	0.66	0.6	0.74	0.36	0.42	1.86	0.77	0.854	0.1494	0.893822
hsa-miR-3180-3p	0.96	1.5	0.9	1.24	2.06	0.66	0.38	0	0	0	0.72	0.6	1.6	0.98	0.66	0.6	0.74	0.36	0.42	1.86	0.77	0.854	0.1494	0.893857
hsa-miR-411-5p	7.27	3.18	5.47	4.53	14.88	4.98	1.74	8.24	10.72	8.56	11.89	5.93	2.91	3.22	4.39	31.51	11.76	7	1.48	1.11	6.957	8.12	0.223	0.894421
hsa-miR-491-5p	1.31	2.06	1.7	0.93	1.98	3.25	1.74	2.25	0.66	4.51	6.17	0.9	3.92	2.93	3.07	1.59	2.61	0.62	2.65	0.19	2.039	2.465	0.2737	0.897741
hsa-miR-505-5p	17.17	17.77	18.02	15.24	16.52	23.08	15.6	20.46	3.48	21.51	24.58	12.16	28.12	25.48	26.1	16.85	16.8	5.05	19.5	5.57	16.885	18.021	0.0939	0.897764
hsa-miR-6836-5p	0	0.09	0.09	0.21	0.34	0.65	0.19	0	0.09	0.35	0.09	0.2	0.2	0.39	0.44	0.4	0.09	0.09	0.11	0	0.201	0.201	0	0.898417
hsa-miR-1270	2.27	1.03	3.95	1.65	1.89	2.17	2.62	1.12	2.82	4.16	0.63	2.01	2.31	4	4.17	0.5	2.24	1.42	3.82	3.53	2.368	2.463	0.0567	0.899219
hsa-miR-548al	0.48	0.84	0.72	0.31	0.69	0.33	0.19	0	0.66	0.35	0.54	0.9	0.4	0.39	0.22	0.89	0.37	0.53	0.32	0.19	0.457	0.475	0.0557	0.899841
hsa-miR-221-3p	1651.81	983.86	829.84	657.8	1420.9	1884.98	1882.82	2829.11	492.59	2831	6034.14	1219.88	1135.36	1216.13	2396.06	1769.85	2272.7	658.04	1630.84	264.8	1546.47	1859.78	0.2662	0.900142
hsa-miR-550a-3p	4.54	5.24	6.64	5.36	14.96	17.98	16.46	15.22	10.72	20.12	11.62	3.62	21.08	9.18	8.56	4.96	16.98	25	12.72	0.74	11.724	11.446	-0.0346	0.900195
hsa-miR-376a-3p	0.24	0.18	0.54	0.2	0.34	0.44	0.38	0.74	1.88	0.46	1.96	0.2	0.2	0	0.44	1.18	2.24	1.6	0	0	0.54	0.782	0.5342	0.902505
hsa-miR-1910-5p	0.12	0	0.09	0	0.09	0.22	0.1	0	0	0.69	1.07	0.1	0.1	0	0	0	0.09	0	0.42	0	0.131	0.178	0.4423	0.903111
hsa-miR-6783-5p	1.19	1.5	0.72	0.51	1.29	1.73	1.36	1.62	0.75	1.62	1.16	1.91	2.31	1.37	1.54	0.59	0.75	0.89	1.8	0	1.229	1.232	0.0035	0.903149
hsa-miR-371b-5p	0.48	0.47	0.36	0.1	0.34	0.33	0.29	0.75	0	1.5	2.15	0	0.4	0.59	0.99	0.2	0.37	0.09	0.42	0	0.462	0.521	0.1734	0.904503
hsa-miR-7109-3p	0.36	0.37	0.81	0.41	0.69	0.43	1.16	0.62	0.28	0.93	0.8	0.2	0.4	0.29	0.88	0.99	0.47	0.18	1.17	1.11	0.606	0.649	0.0989	0.904532
hsa-miR-1226-3p	3.58	2.99	2.06	1.85	3.78	4.44	2.42	3.37	0.47	4.39	6.35	2.01	3.92	3.81	4.39	3.17	3.17	1.06	4.88	0.56	2.935	3.332	0.183	0.904667
hsa-miR-15a-5p	73.46	101.69	90.3	74.02	166.53	116.25	237.64	181.06	243.43	139.24	184.94	42.91	55.13	102.21	125.89	89.79	242.6	550.24	140.98	2.42	142.362	153.711	0.1107	0.905802
hsa-miR-26b-3p	19.68	14.03	12.2	6.28	18.24	20.8	23.93	25.96	4.61	25.67	57.38	10.25	16.97	11.91	22.81	11.2	29.4	9.49	26.82	3.34	17.14	19.957	0.2195	0.908834
hsa-miR-142-5p	1706.31	1051.5	604.04	1047.23	1264.43	160.03	481	378.1	2313.01	160.63	1186.13	688.23	96.71	286.12	287.98	1104.68	982.52	4319.13	173.63	15.79	916.628	914.092	-0.004	0.910133
hsa-miR-1278	8.82	8.51	6.37	5.76	5.68	2.17	5.72	2.99	6.77	3.01	5.01	5.43	2.81	2.44	4.06	13.18	5.6	10.73	5.83	3.72	5.58	5.881	0.0758	0.911998
hsa-miR-3912-3p	1.55	1.31	0.9	0.72	1.89	0.43	0.87	0.37	3.1	0.46	0.8	1.01	0.5	0.98	0.55	2.38	0.75	4.7	0.21	0	1.16	1.188	0.0344	0.914434
hsa-miR-4668-5p	0.24	0.65	0.27	0.1	0.09	0.33	0.39	0	0.19	0	0.09	0.1	0	0.2	0.33	0.2	0.28	0.53	0.21	0.19	0.226	0.213	-0.0855	0.914439
hsa-miR-6516-3p	0.36	0.09	0	0.41	0	0.22	0	0	0.38	0	0.36	0	0.1	0.1	0.33	0	0	0.53	0.11	0	0.146	0.153	0.0676	0.917143
hsa-miR-1185-1-3p	0.72	0.65	0.72	0.41	10.24	4.55	2.52	7.49	1.6	9.25	13.14	5.13	2.51	1.17	4.28	5.95	5.69	1.51	1.48	0.56	3.815	4.142	0.1186	0.918489
hsa-miR-188-5p	0.12	0.56	0.27	0.62	0.86	0.87	1.16	1.12	0.66	0.46	0.72	0.6	0.4	0.88	0.66	0.99	0.84	0.98	0.85	0	0.67	0.692	0.0466	0.919799
hsa-miR-378c	34.94	52.2	32.82	24.71	122.14	113.44	60.65	45.8	81.17	45.45	143.01	63.52	91.38	57.5	60.64	61.94	63.47	89.98	45.37	31.59	61.332	70.84	0.2079	0.920338
hsa-miR-5001-3p	1.67	2.15	2.87	1.34	7.57	12.03	7.17	5.62	1.13	7.05	6.97	2.01	11.05	6.64	6.47	2.87	5.79	3.9	6.36	0.19	4.86	5.225	0.1045	0.921415
hsa-miR-3173-3p	0.24	0.37	0.54	0.21	0.26	0.43	0.39	0.37	0.09	0	0.09	0.3	0.4	0.59	0	0.4	0.28	0.27	0.42	0	0.29	0.275	-0.0766	0.921514
hsa-let-7i-3p	10.02	14.87	10.58	10.6	37.76	59.37	46.31	33.32	4.89	39.9	50.77	13.37	43.08	39.05	37.4	17.94	29.96	10.19	34.45	4.65	26.762	28.086	0.0697	0.92186
hsa-miR-451b	2.27	2.06	2.06	2.16	9.98	0.76	5.91	1.25	3.57	1.97	6.35	3.82	0.4	0.88	1.21	3.17	6.25	6.91	1.38	1.86	3.199	3.223	0.0108	0.922848
hsa-miR-4772-5p	1.67	1.03	0.72	0.1	0.6	0.76	0.39	0.25	1.13	1.62	4.47	0.5	0.1	0.1	0.77	1.39	0.47	1.15	0.95	0.19	0.827	1.009	0.287	0.923411
hsa-miR-4440	0.95	0.75	0.99	0.72	0.52	0.65	0.87	0.37	0.19	0.69	0.98	0.2	0.9	1.85	1.32	1.29	0.56	0	0.11	0.19	0.67	0.74	0.1434	0.923978
hsa-miR-4482-3p	2.03	1.78	0.09	0.21	0	0.54	0.1	0.12	0	0	0	1.71	0.3	0	0.11	1.49	0	0	1.48	0	0.487	0.509	0.0637	0.925466
hsa-miR-539-3p	0.24	0.09	0	0	0.52	0.11	0.29	0.37	1.41	0	0.36	0.2	0	0.1	0.22	0.59	0.37	1.42	0	0	0.303	0.326	0.1056	0.925836
hsa-miR-6513-3p	9.66	10.29	6.73	8.03	12.04	11.92	13.27	7.99	1.79	9.83	12.34	15.58	8.74	10.84	9.76	8.62	12.13	3.28	10.81	1.67	9.155	9.377	0.0346	0.926346
hsa-miR-1285-5p	1.31	1.31	3.86	1.54	2.24	2.71	2.62	1.62	0.56	2.78	2.86	2.01	4.12	2.34	2.96	1.78	2.33	1.86	2.44	0	2.055	2.27	0.1436	0.927519
hsa-miR-660-5p	45.2	38.17	25.56	21.41	46.19	21.24	25.58	21.71	64.99	34.58	42.81	30.25	17.67	24.5	27.53	20.22	30.62	123.31	27.88	1.67	34.463	34.646	0.0076	0.930351
hsa-miR-92a-3p	153001	176412	178477	197772	158668	182911	172446	202973	39723.4	208456	131963	198568	221030	176455	174335	129119	157697	63264.6	217748	219499	167084	168968	0.0162	0.932333
hsa-miR-197-3p	263.67	217.97	240.95	121.68	177.36	321.24	277.17	423.39	39.5	446.85	530.85	114.47	376.48	265.04	422.98	281.05	274.89	68.79	415.21	113.17	252.978	286.293	0.1785	0.932817
hsa-miR-22-5p	88.01	58.84	67.34	80.5	113.2	38.14	109.96	53.53	37.15	62.8	107.8	120.3	33.74	53.59	73.8	153.9	85.22	51.59	62.54	15.61	70.947	75.809	0.0956	0.933221
hsa-miR-548n	0.12	0.47	0.63	0.93	0.09	0.33	0.39	0.25	2.26	0.46	0.36	0.2	0.1	0.68	0.77	1.09	0.65	3.1	0.21	0.19	0.593	0.735	0.3097	0.934516
hsa-miR-597-3p	2.5	2.99	2.42	2.78	2.32	2.71	2.81	1.37	0.47	1.73	2.23	2.61	2.31	3.12	2.96	3.17	1.87	1.06	2.54	2.23	2.21	2.41	0.125	0.934566
hsa-miR-6793-3p	0.12	0.37	0.27	0.51	1.03	0.54	0.29	0.5	0.09	0.46	0.89	0.2	0.5	0.2	0.88	0.5	0.56	0.35	0.42	0	0.418	0.45	0.1064	0.936619
hsa-miR-103a-2-5p	0.24	0.47	0.18	0.21	0.26	0.22	0.19	0.12	0.56	0.81	0.8	0.1	0.6	0.29	0.66	0.2	0.47	0.44	0.64	0	0.326	0.42	0.3655	0.936798
hsa-miR-6750-5p	0.72	1.03	0.99	1.54	1.03	1.3	1.36	0.37	0.38	0.69	0.36	0.7	0.7	1.76	2.08	0.59	1.21	0.8	0.74	0.74	0.941	0.968	0.0408	0.93712
hsa-miR-18b-5p	3.58	3.27	2.15	2.68	8.86	3.68	7.65	2.75	4.99	4.74	4.83	2.31	5.92	5.47	4.93	3.86	4.67	9.31	3.82	0.37	4.435	4.549	0.0366	0.937641
hsa-miR-378h	0.24	0.37	0.09	0	0.95	0.87	0.48	0.37	0.19	0.35	0.63	0.3	0.9	0.49	0.11	0.2	0.56	0.53	0.21	0.19	0.391	0.412	0.0755	0.939489
hsa-miR-5188	0.24	0.47	0.63	0.51	0.26	0.22	0.39	0.5	0.19	0.12	0.18	1.21	0.2	0.39	0.55	0.2	0.09	0.27	0.32	0	0.353	0.341	-0.0499	0.939793
hsa-miR-643	1.43	0.75	0.9	1.03	1.63	0.33	1.16	1	0.94	1.16	1.43	1.11	0.9	1.07	1.32	1.29	1.96	1.33	0.95	0.19	1.033	1.155	0.1611	0.940342
hsa-miR-3173-5p	17.89	10.29	13.45	9.99	8.43	13.33	12.5	13.98	2.26	14.8	16.36	10.55	17.57	10.74	14.37	8.13	12.6	3.55	16.54	11.34	11.692	12.175	0.0584	0.940971
hsa-miR-548d-3p	0.12	0.28	0.18	0.1	0.17	0.11	0.19	0.25	0.66	0.46	0.63	0.2	0.1	0.1	0	0.1	0.56	1.15	0.21	0	0.252	0.305	0.2754	0.942698
hsa-miR-548ab	0.95	0.94	0.81	1.03	0.86	1.19	2.42	1.62	3.01	1.16	0.72	0.3	0.9	1.37	0.99	1.39	1.96	5.41	1.7	0.37	1.399	1.511	0.1111	0.944013
hsa-miR-335-3p	54.38	39.85	22.6	27.28	25.37	9.64	25.58	19.34	18.06	9.6	68.29	20.7	7.33	14.55	29.39	65.9	32.2	30.05	10.07	10.22	25.17	28.87	0.1979	0.945998
hsa-miR-4659a-3p	10.38	11.88	10.4	6.9	13.16	19.39	8.04	13.35	2.54	12.95	12.07	8.94	21.09	11.03	14.04	10.8	11.39	3.28	19.19	2.97	10.899	11.48	0.0749	0.946828
hsa-miR-5010-5p	0.72	2.25	2.33	2.06	1.38	2.38	2.03	1.87	1.13	0.93	1.07	1.81	2.61	3.42	2.96	1.78	1.31	1.42	2.33	0.37	1.708	1.908	0.1598	0.947792
hsa-miR-4672	0.72	0.84	0.72	0.21	2.32	1.63	0.78	1	1.41	0.69	1.07	1.61	0.7	0.88	1.21	0.89	1.68	1.42	1.06	0.19	1.032	1.071	0.0535	0.947935
hsa-miR-6812-3p	0.36	0.56	0.45	0.72	0.95	0.54	0.39	0.62	0.19	0.12	0.27	0.8	0.9	0.68	0.66	0.99	0.37	0	0.32	0.56	0.49	0.555	0.1797	0.949312
hsa-miR-3157-3p	2.62	2.25	1.43	1.85	2.92	2.6	2.81	2.37	1.5	2.54	2.32	3.12	2.21	2.25	1.43	2.08	2.89	1.42	2.33	3.34	2.289	2.339	0.0312	0.950355
hsa-miR-323b-3p	17.05	3.18	12.46	2.88	12.99	5.96	2.71	13.48	2.16	13.3	30.39	13.97	3.01	2.64	4.06	17.34	15.4	3.28	1.59	2.97	8.617	9.465	0.1354	0.95086
hsa-miR-30e-3p	1061.61	737.64	556.51	482.39	684	605.86	490.98	636.65	251.89	576.84	1068.23	537.18	549.2	513.57	627.17	972.08	669.54	425.87	710.75	570.48	608.437	664.407	0.127	0.951241
hsa-miR-942-3p	0.72	1.5	0.99	1.34	0.95	1.73	1.45	1.5	1.22	1.85	1.88	1.51	1.41	1.95	1.97	0.69	2.15	1.06	2.12	0.37	1.325	1.511	0.1895	0.951953
hsa-miR-107	975.51	1220.17	847.41	911.66	4160.68	3641.25	3223.8	2645.8	1014.05	2698.47	3938.17	1450.93	2277.76	2623.9	2734.6	1674.02	2774.51	2652.27	1846.45	132.12	2133.88	2210.47	0.0509	0.952481
hsa-miR-26a-5p	91562.8	48539.8	31984	29010.5	58305.6	37906.2	65410.9	59358.2	20660	61393.5	108414	77386.9	29997.6	36084.8	53826.5	72819.9	70058.5	29743.3	54643.4	16629.5	50413.1	54960.4	0.1246	0.955035
hsa-miR-6805-5p	0.6	0.37	0.9	0.62	0.43	0.87	0.97	0.25	0.56	0.46	0.45	0.4	0.4	1.46	0.66	0.2	0.56	0.35	0.74	1.11	0.603	0.633	0.07	0.955702
hsa-miR-1227-3p	0.36	0.47	0.63	1.03	1.12	0.98	0.58	0.25	0.38	0.23	1.07	0.5	0.4	1.56	0.88	0.79	0.28	0.18	0.64	0.74	0.603	0.704	0.2234	0.955924
hsa-miR-4732-3p	126.05	151.74	157.02	161.41	134.1	182.67	118.09	140.76	16.93	123.86	84.56	128.74	237.4	174.64	191.69	138.05	120.13	27.57	181.37	89.38	131.263	137.353	0.0654	0.956925
hsa-miR-369-5p	4.17	2.34	3.14	1.96	5.85	2.28	1.36	3.62	3.1	4.51	9.65	4.62	0.8	0.68	2.52	14.87	4.85	1.42	0.32	0.74	3.233	4.047	0.324	0.95747
hsa-miR-3124-5p	1.07	1.87	2.96	1.13	1.81	2.06	1.07	1.12	0.38	1.5	1.52	1.41	2.01	1.17	1.21	1.39	1.12	0.44	1.38	3.9	1.497	1.555	0.0548	0.959489
hsa-miR-30a-5p	61.06	87.84	55.42	61.97	46.36	100.87	86.51	87.97	87.95	167.11	216.94	125.93	67.38	70.29	132.04	63.42	106.22	52.75	50.99	80.83	84.306	96.679	0.1976	0.961862
hsa-miR-6503-3p	6.08	4.3	1.52	2.37	3.53	4.12	2.71	4.99	1.5	3.82	7.6	3.02	2.11	1.66	2.52	4.86	1.77	1.33	2.86	8.92	3.494	3.665	0.0689	0.962248
hsa-miR-183-5p	3212.87	4117.59	2437.32	2549.78	2557.6	1488.66	1828.28	2709.32	1319.93	3222.8	1192.47	2352.02	1656.15	2345.19	1038.74	1086.74	1479.01	989.05	1496.96	10635.2	2544.41	2427.16	-0.0681	0.964248
hsa-miR-4775	0.6	0.37	0.54	1.03	0	0.65	0.29	1.12	0.56	1.04	0.36	0.5	0.7	0.98	0.33	0.69	0.09	1.86	0.85	0	0.62	0.636	0.0368	0.968226
hsa-miR-627-3p	2.03	2.25	1.43	0.51	4.13	0.76	0.97	0.62	1.41	1.04	4.56	2.41	0.9	0.49	0.66	0.99	2.8	2.3	1.8	0.19	1.515	1.71	0.1747	0.968379
hsa-miR-511-5p	1.43	0.94	1.17	1.24	0.26	0.33	0.97	0.12	0	0.46	0.8	0.7	0.3	0.78	0.22	2.28	0.56	0	0.64	1.11	0.692	0.739	0.0948	0.968971
hsa-miR-652-5p	0.6	0.37	0.36	0.1	1.38	0.54	0.87	2.12	1.98	2.89	3.04	0.1	0.4	0.2	0.44	0.1	1.59	4.26	1.38	0	1.121	1.151	0.0381	0.970786
hsa-miR-144-5p	365.28	139.2	277.27	692.39	373.83	345.62	287.24	293.37	1257.76	216.6	405.36	152.96	214.9	325.56	447.1	639.8	323.52	1934.48	286.63	20.63	424.856	475.094	0.1612	0.973381
hsa-miR-143-3p	820.84	663.45	249.2	216.18	568.91	237.28	317.37	398.44	291.87	333.75	1279.8	219.49	184.37	233.21	229.86	1014.7	533.54	544.12	346.1	113.54	409.729	469.873	0.1976	0.97645
hsa-miR-6511b-5p	2.62	1.12	0.72	1.24	1.54	0.86	0.78	1	0.38	0.46	0.9	0.8	1	1.18	2.42	1	0.74	0	0.22	3.34	1.072	1.16	0.1138	0.976965
hsa-miR-30c-5p	6914.21	4759.8	3071.57	1459.52	4108.72	2569.4	3343.45	5110.29	1880.9	5430.24	12874.3	4516.01	2616.88	2356.32	3547.98	2081.82	6410.47	3261.37	4993.97	835.46	3864.81	4349.45	0.1704	0.979725
hsa-miR-150-5p	1945.3	1287.71	1731.23	617.35	1585.45	2091.92	1377.51	3084.92	488.64	2442.54	6154.27	627.93	1698.23	1773.64	3001.85	1571.15	1735.14	690.22	2135.2	346.19	1665.26	1973.38	0.2449	0.980282
hsa-let-7a-3p	28.38	13.28	5.11	6.9	13.93	4.44	5.04	6.61	18.34	4.39	35.49	8.04	1.91	4.3	5.37	16.25	17.08	26.06	7.63	1.3	10.642	12.343	0.2139	0.981147
hsa-miR-7641	27.19	23.2	44.48	50.03	16.95	14.84	15.11	15.97	1.13	8.9	28.33	22.71	21.79	24.21	29.17	38.05	14	2.57	10.39	49.99	21.78	24.121	0.1473	0.981182
hsa-miR-3127-3p	3.58	3.09	3.5	3.91	4.21	2.49	6.1	3.62	0.56	3.24	2.59	4.42	2.31	3.12	4.93	4.56	1.68	0.27	4.88	6.5	3.43	3.526	0.0398	0.982295
hsa-miR-3187-3p	1.67	2.06	1.08	2.99	3.96	2.93	1.84	2.37	0.38	0.69	1.7	1.21	3.21	4.1	2.74	3.37	2.33	0.27	1.7	0.93	1.997	2.156	0.1105	0.984963
hsa-miR-548l	3.58	2.53	3.77	2.57	2.24	2.49	2.71	2.62	1.32	3.35	2.32	2.31	3.72	3.32	3.95	2.87	2.8	2.39	2.65	2.23	2.718	2.856	0.0715	0.985235
hsa-miR-6815-5p	1.55	1.5	3.59	2.68	1.89	3.79	2.33	2.99	0.38	1.16	1.52	1.21	4.22	3.71	2.74	2.08	2.71	1.24	2.65	0.93	2.186	2.301	0.074	0.98524
hsa-miR-10a-5p	485.13	118.25	80.71	142.78	69.07	61.97	109.67	121.54	72.24	72.39	202.72	296.58	19.68	67.55	109.66	323.07	122.28	57.36	39.86	146.06	133.375	138.482	0.0542	0.987951
hsa-miR-654-3p	34.11	17.4	33.99	12.04	110.44	39.65	19.28	54.78	11.38	78.87	179.3	62.41	20.59	12.01	21.93	65.51	78.22	15.42	11.98	9.11	41.194	47.648	0.21	0.993463
hsa-miR-381-3p	33.15	16	30.58	13.79	120.77	38.25	40.49	98.95	60.2	127.44	120.13	101.61	17.67	18.74	25.77	83.44	66.37	27.48	20.56	133.61	57.962	61.538	0.0864	0.996803
hsa-miR-1244	0	0	0	0	0	0	0	0	0	0	0	0	0	0.1	0	0	0	0	0	0	0	0.01	0	1
hsa-miR-128-2-5p	0	0	0	0	0	0	0	0	0	0	0	0	0	0	0	0.1	0	0	0	0	0	0.01	0	1
hsa-miR-216a-3p	0	0	0	0	0	0	0	0	0	0	0	0	0	0	0	0	0.09	0	0	0	0	0.009	-0.152	1
hsa-miR-3912-5p	0	0	0	0	0	0	0.1	0	0	0	0	0	0	0	0	0	0	0	0	0	0.01	0	0	1
hsa-miR-4476	0	0	0	0	0.09	0	0	0	0	0	0	0	0	0	0	0	0	0	0	0	0.009	0	0.152	1
hsa-miR-519e-5p	0	0	0	0	0	0	0	0	0	0	0	0	0	0	0	0	0.09	0	0	0	0	0.009	-0.152	1
hsa-miR-586	0	0	0	0	0	0	0	0	0	0	0	0	0	0	0	0.1	0	0	0	0	0	0.01	0	1
hsa-miR-4436b-5p	0	0	0	0	0	0	0	0	0	0	0	0	0	0.1	0	0	0	0	0	0	0	0.01	0	1
hsa-miR-3678-3p	0	0	0	0	0.09	0	0	0	0	0	0	0	0	0	0	0	0	0	0	0	0.009	0	0.152	1
hsa-miR-588	0	0	0	0	0	0	0.1	0	0	0	0	0	0	0	0	0	0	0	0	0	0.01	0	0	1
hsa-miR-4430	0	0	0	0	0	0	0	0	0	0	0.09	0	0	0	0	0	0	0	0	0	0	0.009	-0.152	1
hsa-miR-4323	0	0	0	0	0	0	0	0	0	0	0.09	0	0	0	0	0	0	0	0	0	0	0.009	-0.152	1
hsa-miR-3663-5p	0	0	0	0	0	0	0	0	0	0	0	0	0.1	0	0	0	0	0	0	0	0	0.01	0	1
hsa-miR-7161-3p	0	0	0	0	0	0	0	0	0	0	0	0	0	0.1	0	0	0	0	0	0	0	0.01	0	1
hsa-miR-4726-3p	0	0	0	0	0	0	0	0	0	0	0	0	0	0.1	0	0	0	0	0	0	0	0.01	0	1
hsa-miR-7-2-3p	0	0	0	0	0	0	0	0	0	0	0	0	0	0	0	0	0.09	0	0	0	0	0.009	-0.152	1
hsa-miR-921	0	0	0	0	0	0	0	0	0	0	0.09	0	0	0	0	0	0	0	0	0	0	0.009	-0.152	1
hsa-miR-4666a-5p	0	0	0	0	0	0	0.1	0	0	0	0	0	0	0	0	0	0	0	0	0	0.01	0	0	1
hsa-miR-4752	0	0	0	0	0	0	0	0	0	0	0	0	0	0	0	0	0.09	0	0	0	0	0.009	-0.152	1
hsa-miR-5699-5p	0	0	0	0	0.09	0	0	0	0	0	0	0	0	0	0	0	0	0	0	0	0.009	0	0.152	1
hsa-miR-1273g-5p	0	0	0	0	0	0	0	0	0	0	0	0	0	0	0	0	0.09	0	0	0	0	0.009	-0.152	1
hsa-miR-518e-3p	0	0	0	0	0	0	0	0	0	0	0	0	0	0	0	0	0.09	0	0	0	0	0.009	-0.152	1
hsa-miR-489-3p	0	0	0	0	0	0	0	0	0	0	0.09	0	0	0	0	0	0	0	0	0	0	0.009	-0.152	1
hsa-miR-19b-2-5p	0	0	0	0	0	0	0	0	0	0	0	0	0	0.1	0	0	0	0	0	0	0	0.01	0	1
hsa-miR-449c-3p	0	0	0	0	0	0	0.1	0	0	0	0	0	0	0	0	0	0	0	0	0	0.01	0	0	1
hsa-miR-6888-3p	0	0	0	0	0	0	0	0	0	0	0	0	0	0	0	0	0.09	0	0	0	0	0.009	-0.152	1
hsa-miR-892b	0	0	0	0	0	0	0.1	0	0	0	0	0	0	0	0	0	0	0	0	0	0.01	0	0	1
hsa-miR-4442	0	0	0	0	0	0	0	0	0	0	0	0	0.1	0	0	0	0	0	0	0	0	0.01	0	1
hsa-miR-4439	0	0	0	0	0	0	0	0	0	0	0	0	0	0	0	0.1	0	0	0	0	0	0.01	0	1
hsa-miR-6747-5p	0	0	0	0	0	0	0.1	0	0	0	0	0	0	0	0	0	0	0	0	0	0.01	0	0	1
hsa-miR-6740-3p	0	0	0	0	0	0	0	0	0	0	0	0	0	0	0	0.1	0	0	0	0	0	0.01	0	1
hsa-miR-5194	0	0	0	0	0	0	0.1	0	0	0	0	0	0	0	0	0	0	0	0	0	0.01	0	0	1
hsa-miR-1911-3p	0	0	0	0	0	0	0	0	0	0	0.09	0	0	0	0	0	0	0	0	0	0	0.009	-0.152	1
hsa-miR-6732-5p	0	0	0	0	0	0	0	0	0	0	0	0	0	0	0	0	0.09	0	0	0	0	0.009	-0.152	1
hsa-miR-523-3p	0	0	0	0	0	0	0.1	0	0	0	0	0	0	0	0	0	0	0	0	0	0.01	0	0	1
hsa-miR-6510-3p	0	0	0	0	0	0	0	0	0	0	0	0	0	0.1	0	0	0	0	0	0	0	0.01	0	1
hsa-miR-4802-5p	0	0	0	0	0	0	0	0	0	0	0	0	0.1	0	0	0	0	0	0	0	0	0.01	0	1
hsa-miR-3168	0	0	0	0	0	0	0	0	0	0	0	0	0.1	0	0	0	0	0	0	0	0	0.01	0	1
hsa-miR-526b-3p	0	0	0	0	0	0	0	0	0	0	0	0	0	0	0	0	0.09	0	0	0	0	0.009	-0.152	1
hsa-miR-934	0	0	0	0	0	0	0	0	0	0	0	0	0	0	0.11	0	0	0	0	0	0	0.011	0.1375	1
hsa-miR-3151-5p	0	0	0	0	0	0	0	0	0	0	0	0	0	0	0.11	0	0	0	0	0	0	0.011	0.1375	1
hsa-miR-8071	0	0	0	0	0.09	0	0	0	0	0	0	0	0	0	0	0	0	0	0	0	0.009	0	0.152	1
hsa-miR-1181	0	0	0	0	0	0	0	0	0	0	0	0	0	0	0	0	0.09	0	0	0	0	0.009	-0.152	1
hsa-miR-373-5p	0	0	0	0	0	0	0	0	0	0	0	0	0	0.1	0	0	0	0	0	0	0	0.01	0	1
hsa-miR-7161-5p	0	0	0	0	0	0	0	0	0	0	0	0	0	0	0	0	0.09	0	0	0	0	0.009	-0.152	1
hsa-miR-1247-5p	0	0	0	0	0	0	0	0	0	0	0	0	0	0	0	0.1	0	0	0	0	0	0.01	0	1
hsa-miR-4686	0	0	0	0	0	0	0	0	0	0	0	0	0	0	0.11	0	0	0	0	0	0	0.011	0.1375	1
hsa-miR-4436a	0	0	0	0	0	0	0	0	0	0	0	0	0.1	0	0	0	0	0	0	0	0	0.01	0	1
hsa-miR-6823-5p	0	0	0	0	0.09	0	0	0	0	0	0	0	0	0	0	0	0	0	0	0	0.009	0	0.152	1
hsa-miR-4733-5p	0	0	0	0	0	0	0	0	0	0	0	0	0	0	0.11	0	0	0	0	0	0	0.011	0.1375	1
hsa-miR-5571-3p	0	0	0	0	0.09	0	0	0	0	0	0	0	0	0	0	0	0	0	0	0	0.009	0	0.152	1
hsa-miR-6883-5p	0	0	0	0	0	0	0	0	0	0	0	0	0	0	0	0.1	0	0	0	0	0	0.01	0	1
hsa-miR-31-3p	0	0	0	0	0	0	0	0	0	0	0	0	0	0	0	0	0.09	0	0	0	0	0.009	-0.152	1
hsa-miR-3692-5p	0	0	0	0	0	0	0	0	0	0	0	0	0	0	0.11	0	0	0	0	0	0	0.011	0.1375	1
hsa-miR-488-3p	0	0	0	0	0	0	0	0	0	0	0.09	0	0	0	0	0	0	0	0	0	0	0.009	-0.152	1
hsa-miR-6831-3p	0	0	0	0	0	0	0	0	0	0	0	0	0	0.1	0	0	0	0	0	0	0	0.01	0	1
hsa-miR-6827-3p	0	0	0	0	0	0	0	0	0	0	0	0	0	0	0.11	0	0	0	0	0	0	0.011	0.1375	1
hsa-miR-4539	0	0	0	0	0	0	0	0	0	0	0	0	0	0	0	0.1	0	0	0	0	0	0.01	0	1
hsa-miR-3194-5p	0	0	0	0	0	0	0	0	0	0	0.09	0	0	0	0	0	0	0	0	0	0	0.009	-0.152	1
hsa-miR-938	0	0	0	0	0	0	0	0	0	0	0	0	0	0	0	0	0.09	0	0	0	0	0.009	-0.152	1
hsa-miR-4641	0	0	0	0	0	0	0	0	0	0	0	0	0.1	0	0	0	0	0	0	0	0	0.01	0	1
hsa-let-7a-2-3p	0	0	0	0	0	0	0.1	0	0	0	0	0	0	0	0	0	0	0	0	0	0.01	0	0	1
hsa-miR-4795-5p	0	0	0	0	0	0	0	0	0	0	0.09	0	0	0	0	0.1	0	0	0	0	0	0.019	0.926	1
hsa-miR-141-5p	0	0	0	0	0.09	0	0	0	0	0	0	0	0	0	0	0	0	0	0	0	0.009	0	0.152	1
hsa-miR-4725-5p	0	0	0	0	0	0	0	0	0	0	0.09	0	0	0	0	0	0	0	0	0	0	0.009	-0.152	1
hsa-miR-6798-5p	0	0	0	0	0	0	0	0	0	0	0	0	0	0	0	0	0.09	0	0	0	0	0.009	-0.152	1
hsa-miR-4739	0	0	0	0	0	0	0	0	0	0	0	0	0	0	0	0.1	0	0	0	0	0	0.01	0	1
hsa-miR-6759-5p	0	0	0	0	0	0	0	0	0	0	0	0	0	0.1	0	0	0	0	0	0	0	0.01	0	1
hsa-miR-4317	0	0	0	0	0	0	0.1	0	0	0	0	0	0	0	0	0	0	0	0	0	0.01	0	0	1
hsa-miR-4764-5p	0	0	0	0	0.09	0	0	0	0	0	0	0	0	0	0	0	0	0	0	0	0.009	0	0.152	1
hsa-miR-4708-5p	0	0	0	0	0	0	0	0	0	0	0.09	0	0	0	0	0	0	0	0	0	0	0.009	-0.152	1
hsa-miR-6739-5p	0	0	0	0	0	0	0	0	0	0	0	0	0.1	0	0	0	0	0	0	0	0	0.01	0	1
hsa-miR-6824-5p	0	0	0	0	0	0	0	0	0	0	0.09	0	0	0	0	0	0	0	0	0	0	0.009	-0.152	1
hsa-miR-6805-3p	0	0	0	0	0	0	0	0	0	0	0	0	0.1	0	0	0	0	0	0	0	0	0.01	0	1
hsa-miR-3170	0	0	0	0	0	0	0	0	0	0	0	0	0	0	0.11	0	0	0	0	0	0	0.011	0.1375	1
hsa-miR-7152-3p	0	0	0	0	0	0	0.1	0	0	0	0	0	0	0	0	0	0	0	0	0	0.01	0	0	1
hsa-miR-639	0	0	0	0	0	0	0	0	0	0	0.09	0	0	0	0	0	0	0	0	0	0	0.009	-0.152	1
hsa-miR-514b-3p	0	0	0	0	0	0	0	0	0	0	0.09	0	0	0	0	0	0	0	0	0	0	0.009	-0.152	1
hsa-miR-3178	0	0	0	0	0	0	0	0	0	0	0	0	0	0	0	0	0.09	0	0	0	0	0.009	-0.152	1
hsa-miR-6871-5p	0	0	0	0	0	0	0	0	0	0	0	0	0	0	0	0	0.09	0	0	0	0	0.009	-0.152	1
hsa-miR-4531	0	0	0	0	0	0	0	0	0	0	0.09	0	0	0	0	0	0	0	0	0	0	0.009	-0.152	1
hsa-miR-609	0	0	0	0	0	0	0	0	0	0	0	0	0.1	0	0	0	0	0	0	0	0	0.01	0	1
hsa-miR-3144-5p	0	0	0	0	0	0	0	0	0	0	0.09	0	0	0	0	0	0	0	0	0	0	0.009	-0.152	1
hsa-miR-1271-3p	0	0	0	0	0.09	0	0	0	0	0	0	0	0	0	0	0	0	0	0	0	0.009	0	0.152	1
hsa-miR-5095	0	0	0	0	0	0	0	0	0	0	0	0	0	0.1	0	0	0	0	0	0	0	0.01	0	1
hsa-miR-6715b-5p	0	0	0	0	0	0	0	0	0	0	0	0	0	0	0	0	0.09	0	0	0	0	0.009	-0.152	1
hsa-miR-4426	0	0	0	0	0.09	0	0	0	0	0	0	0	0	0	0	0	0	0	0	0	0.009	0	0.152	1
hsa-miR-4715-5p	0	0	0	0	0	0	0	0	0	0	0.09	0	0	0	0	0	0	0	0	0	0	0.009	-0.152	1
hsa-miR-517c-3p	0	0	0	0	0	0	0.1	0	0	0	0	0	0	0	0	0	0	0	0	0	0.01	0	0	1
hsa-miR-6821-3p	0	0	0	0	0	0	0	0	0	0	0	0	0	0	0	0.1	0	0	0	0	0	0.01	0	1
hsa-miR-4649-5p	0	0	0	0	0	0	0	0	0	0	0	0	0	0.1	0	0	0	0	0	0	0	0.01	0	1
hsa-miR-513b-5p	0	0	0	0	0	0	0	0	0	0	0	0	0	0.1	0	0	0	0	0	0	0	0.01	0	1
hsa-miR-4728-3p	0	0.09	0.18	0.21	0.09	0.11	0.68	0	0.09	0.81	0.45	0	0.8	0.29	0.33	0.5	0.09	0.09	0	0	0.226	0.255	0.1742	1
hsa-miR-6507-5p	0	0	0	0	0	0.11	0	0	0	0	0	0	0	0	0	0	0	0	0	0	0.011	0	-0.1375	1
hsa-miR-3613-3p	1.55	0.37	1.35	0.62	1.03	0.87	0.97	0.62	2.16	0.81	1.25	0.4	1	0.29	0.77	0.3	1.31	4.61	0.64	0	1.035	1.057	0.0303	1
hsa-miR-3652	0	0	0	0	0	0.11	0	0	0	0	0	0	0	0	0	0.2	0	0	0	0	0.011	0.02	0.8625	1
hsa-miR-5683	0	0	0	0	0	0.11	0	0	0	0	0	0	0	0	0	0	0	0	0	0	0.011	0	-0.1375	1
hsa-miR-5192	0	0.19	0	0	0	0.11	0.1	0	0	0	0	0.1	0	0	0	0.1	0	0	0.32	0	0.04	0.052	0.3785	1
hsa-miR-384	0	0	0	0	0	0	0	0	0	0	0.18	0	0	0	0	0	0	0	0	0	0	0.018	0.848	1
hsa-miR-5190	0	0	0	0	0	0	0	0	0	0	0	0.1	0	0	0	0	0	0	0	0	0	0.01	0	1
hsa-miR-548as-3p	0	0	0	0	0	0	0	0	0	0.12	0.09	0	0	0.2	0	0	0	0	0	0	0.012	0.029	1.273	1
hsa-miR-6846-5p	0	0	0	0	0	0.11	0	0	0	0	0	0	0	0	0	0	0	0	0	0	0.011	0	-0.1375	1
hsa-miR-892a	0	0	0	0	0	0	0	0.12	0	0	0	0	0	0	0	0.1	0	0	0	0.19	0.012	0.029	1.273	1
hsa-miR-6886-5p	0	0	0	0	0	0	0	0	0	0	0	0	0	0	0	0	0	0.09	0	0	0	0.009	-0.152	1
hsa-miR-2114-5p	0	0	0	0	0	0.11	0	0	0	0	0	0	0	0	0	0	0	0	0	0	0.011	0	-0.1375	1
hsa-miR-548ah-5p	0	0	0	0	0	0	0.1	0	0	0	0.09	0	0	0	0	0.2	0	0	0	0	0.01	0.029	1.5361	1
hsa-miR-4763-3p	0	0	0	0	0	0	0	0	0	0	0	0	0	0	0	0	0	0.09	0	0	0	0.009	-0.152	1
hsa-miR-4478	0.12	0.09	0.09	0	0	0	0	0.12	0	0	0	0	0	0	0	0.3	0	0	0	0	0.042	0.03	-0.4854	1
hsa-miR-3116	0	0	0.09	0	0	0	0	0	0	0	0	0	0	0	0	0	0	0	0	0	0.009	0	0.152	1
hsa-miR-5585-5p	0	0	0	0	0	0.11	0	0	0	0	0	0	0	0	0	0	0	0	0	0	0.011	0	-0.1375	1
hsa-miR-1252-5p	0	0	0	0	0	0	0	0	0	0	0	0	0	0	0	0	0	0.09	0	0	0	0.009	-0.152	1
hsa-miR-4674	0	0	0	0	0	0	0	0	0	0	0	0	0	0	0	0	0	0	0.11	0	0	0.011	0.1375	1
hsa-miR-6827-5p	0	0	0	0	0	0	0	0	0	0.12	0.27	0	0	0	0	0	0	0	0	0	0.012	0.027	1.1699	1
hsa-miR-548v	0	0	0	0	0	0	0	0	0	0	0	0	0	0	0	0	0	0	0.11	0	0	0.011	0.1375	1
hsa-miR-4639-3p	0	0.09	0	0	0.09	0	0.1	0	0	0	0.09	0	0	0.1	0	0	0	0	0	0	0.028	0.019	-0.5594	1
hsa-miR-6854-5p	0.12	0.19	0.09	0	0.09	0.11	0	0.25	0	0.23	0.54	0.1	0	0	0	0	0.09	0.09	0.21	0	0.108	0.103	-0.0684	1
hsa-miR-4720-5p	0	0	0	0	0	0	0	0	0.09	0	0	0	0	0	0	0	0	0	0	0	0.009	0	0.152	1
hsa-miR-380-3p	0	0	0	0	0.09	0	0	0.12	0.19	0.12	0.27	0	0	0	0	0	0.19	0.27	0	0	0.052	0.073	0.4894	1
hsa-miR-6878-3p	0	0	0.09	0	0	0	0	0	0	0	0	0	0	0	0	0	0	0	0	0	0.009	0	0.152	1
hsa-miR-4727-5p	0	0	0	0	0	0.11	0.1	0	0	0	0	0	0	0.2	0.11	0	0	0	0	0	0.021	0.031	0.5619	1
hsa-miR-3941	0	0	0	0	0	0	0	0	0	0	0	0	0	0	0	0	0	0.09	0	0	0	0.009	-0.152	1
hsa-miR-6776-3p	0	0	0	0	0	0	0.1	0	0	0	0.09	0	0.2	0	0	0	0	0	0	0	0.01	0.029	1.5361	1
hsa-miR-520c-3p	0	0	0	0	0	0	0	0.25	0	0	0	0	0	0	0	0	0.28	0	0	0	0.025	0.028	0.1635	1
hsa-miR-518c-5p	0	0	0	0	0	0	0	0.25	0	0	0	0	0	0	0	0	0.09	0	0	0	0.025	0.009	-1.4739	1
hsa-miR-6764-3p	0	0	0	0.31	0	0	0	0.12	0	0	0	0	0.1	0.1	0.11	0	0	0	0	0	0.043	0.031	-0.4721	1
hsa-miR-6748-5p	0	0	0	0	0	0.11	0	0	0	0	0	0	0	0	0	0	0	0	0	0	0.011	0	-0.1375	1
hsa-miR-3942-3p	0	0	0.09	0	0	0.11	0	0	0.09	0	0	0	0	0	0	0	0	0.18	0	0	0.029	0.018	-0.6881	1
hsa-miR-6731-5p	0.12	0	0	0	0	0	0	0.12	0	0.12	0.18	0	0.1	0.1	0	0.1	0	0	0	0	0.036	0.048	0.415	1
hsa-miR-5584-5p	0	0.09	0	0	0	0.22	0	0.12	0.09	0	0	0.1	0	0.1	0.11	0.2	0.28	0	0	0	0.052	0.079	0.6033	1
hsa-miR-5586-3p	0	0	0	0	0	0	0	0.12	0	0	0	0	0	0	0	0	0	0	0	0	0.012	0	-0.263	1
hsa-miR-6729-3p	0	0.19	0.09	0	0.17	0	0	0.12	0	0	0.18	0	0	0	0.22	0	0.09	0.09	0	0	0.057	0.058	0.0251	1
hsa-miR-499b-3p	0.12	0	0	0	0	0	0	0	0	0	0	0	0	0	0	0	0	0	0	0	0.012	0	-0.263	1
hsa-miR-4728-5p	0	0	0	0	0	0	0	0	0	0	0	0	0	0	0	0	0	0	0.11	0	0	0.011	0.1375	1
hsa-miR-6838-3p	0	0	0	0.1	0	0	0	0	0	0	0	0	0.1	0	0.11	0	0	0	0	0	0.01	0.021	1.0704	1
hsa-miR-658	0	0.19	0	0	0	0	0	0	0	0	0.09	0	0	0	0	0	0	0	0	0	0.019	0.009	-1.078	1
hsa-miR-6890-5p	0	0	0	0	0	0	0	0	0	0	0	0	0	0	0	0	0	0	0.11	0	0	0.011	0.1375	1
hsa-miR-466	0	0	0	0	0	0	0	0	0.09	0	0	0	0	0	0	0	0	0	0	0	0.009	0	0.152	1
hsa-miR-3680-5p	0.24	0.09	0.09	0	0.43	0	0	0	0.38	0	0	0.3	0	0.1	0.22	0.1	0	0.35	0.11	0	0.123	0.118	-0.0599	1
hsa-miR-3529-5p	0.12	0	0	0.21	0	0	0.1	0	0	0	0	0	0	0.1	0	0	0.09	0	0	0.37	0.043	0.056	0.3811	1
hsa-miR-4685-5p	0	0	0	0	0	0	0	0	0	0	0	0.1	0	0	0	0	0	0	0	0	0	0.01	0	1
hsa-miR-1-5p	0	0	0	0	0	0	0	0	0	0	0	0	0	0	0	0	0	0	0.11	0	0	0.011	0.1375	1
hsa-miR-3622a-5p	0	0	0	0	0	0	0	0	0	0.12	0	0	0	0	0	0	0	0	0	0	0.012	0	-0.263	1
hsa-miR-6825-5p	0.12	0.19	0.45	0.31	0.17	0.65	0.1	0	0.28	0.12	0.18	0	0.4	0.29	0.33	0.1	0.19	0.53	0.21	0.19	0.239	0.242	0.018	1
hsa-miR-4768-5p	0	0	0.09	0	0	0	0	0	0	0	0	0	0	0	0	0	0	0	0	0	0.009	0	0.152	1
hsa-miR-4638-3p	0.12	0.19	0.18	0.31	1.03	0.98	0.29	1.12	0	0.46	0.54	0.2	0.6	1.07	0.77	0.2	0.75	0.18	0.21	0.19	0.468	0.471	0.0092	1
hsa-miR-3184-5p	0.24	0	0.09	0.1	0.09	0	0	0	0	0.12	0.09	0	0.3	0	0	0	0.09	0	0.11	0	0.064	0.059	-0.1174	1
hsa-miR-4763-5p	0	0	0.27	0.1	0.17	0.33	0.1	0	0	0	0.18	0	0	0	0	0	0.19	0.09	0.21	0.19	0.097	0.086	-0.1736	1
hsa-miR-580-5p	0	0	0	0	0.09	0	0	0	0	0	0	0.1	0	0	0	0	0.09	0	0	0	0.009	0.019	1.078	1
hsa-miR-6881-3p	0.95	1.68	1.43	0.82	1.03	1.52	2.13	1.75	0.09	0.93	0.72	0.8	2.31	1.17	1.32	1.39	0.84	0.62	1.7	1.86	1.233	1.273	0.0461	1
hsa-miR-6791-3p	0	0.09	0.09	0	0	0	0.1	0.12	0	0.23	0.18	0	0.2	0	0.22	0.1	0.09	0	0.11	0	0.063	0.09	0.5146	1
hsa-miR-6789-5p	0	0.09	0	0	0	0.11	0	0	0	0	0.09	0	0	0	0	0	0.09	0	0	0	0.02	0.018	-0.152	1
hsa-miR-4747-3p	0.12	0.19	0.09	0.1	0.26	0.65	0.29	0.12	0.09	0.12	0.27	0	0.5	0.29	0.33	0.3	0.28	0.09	0.32	0	0.203	0.238	0.2295	1
hsa-miR-6829-3p	0	0	0	0	0	0	0	0	0	0	0	0	0	0	0	0	0	0	0.11	0	0	0.011	0.1375	1
hsa-miR-548ba	0.12	0	0	0	0	0.11	0	0	0	0	0	0	0	0	0	0	0.09	0	0	0	0.023	0.009	-1.3536	1
hsa-miR-496	0.24	0.09	0.36	0	0.52	0.22	0.19	0.12	0	0.69	1.25	0.2	0	0.2	0.33	0.3	0.56	0.09	0.11	0	0.243	0.304	0.3231	1
hsa-miR-6895-5p	0	0.09	0	0	0.09	0	0	0	0	0.12	0.09	0	0	0.1	0	0	0	0	0	0	0.03	0.019	-0.659	1
hsa-miR-6785-3p	0	0	0	0	0	0	0	0	0	0.12	0	0	0	0	0	0	0	0	0	0	0.012	0	-0.263	1
hsa-miR-4690-5p	0	0	0	0	0	0	0	0.12	0	0	0.18	0	0	0	0	0.1	0	0	0	0	0.012	0.028	1.2224	1
hsa-miR-1469	0.12	0	0	0	0	0	0	0	0	0	0	0	0	0	0	0	0	0	0	0	0.012	0	-0.263	1
hsa-miR-6128	0	0.19	0	0	0	0	0.1	0	0	0	0.09	0	0.1	0.1	0	0.1	0	0.09	0	0	0.029	0.048	0.727	1
hsa-miR-1295a	0.12	0	0.18	0.1	0.17	0.11	0.1	0	0	0.12	0.45	0.1	0.1	0	0	0.1	0.09	0	0.11	0	0.09	0.095	0.078	1
hsa-miR-6804-5p	0	0.19	0.18	0.31	0.17	0.33	0.1	0.62	0.09	0.23	0.36	0	0.5	0	0.33	0.59	0.09	0.09	0.32	0.19	0.222	0.247	0.154	1
hsa-miR-6753-5p	0.12	0	0	0	0	0	0	0	0	0	0	0	0	0	0	0	0	0	0	0	0.012	0	-0.263	1
hsa-miR-4662b	0	0	0	0	0	0	0	0	0.09	0	0	0	0	0	0	0	0	0	0	0	0.009	0	0.152	1
hsa-miR-19a-5p	0	0	0	0	0	0	0	0	0	0	0	0	0	0	0	0	0	0.09	0	0	0	0.009	-0.152	1
hsa-miR-5093	0	0	0	0.1	0	0	0	0	0	0	0	0	0	0	0	0	0	0	0	0	0.01	0	0	1
hsa-miR-6794-3p	0	0	0	0	0	0.11	0	0	0	0	0	0	0	0	0	0.1	0	0	0.11	0	0.011	0.021	0.9329	1
hsa-miR-203b-3p	0	0	0	0	0	0	0	0	0	0	0	0	0	0	0	0	0	0.09	0	0	0	0.009	-0.152	1
hsa-miR-4717-5p	0.12	0	0.09	0	0	0	0	0	0	0	0	0	0	0	0.11	0	0	0	0	0	0.021	0.011	-0.9329	1
hsa-miR-612	0.12	0	0	0	0	0	0	0	0	0	0	0.1	0.1	0	0	0	0	0	0	0	0.012	0.02	0.737	1
hsa-miR-4797-5p	0.6	0.47	0.27	0.21	0.17	0.54	0.29	0.12	0.09	0.12	0.09	0.9	0.3	0.2	0.11	0.5	0.19	0.18	0.11	0.19	0.288	0.277	-0.0562	1
hsa-miR-7843-3p	0	0	0.09	0.1	0	0	0	0.12	0	0.12	0	0	0	0	0.11	0.1	0.28	0	0.11	0	0.043	0.06	0.4806	1
hsa-miR-4758-3p	0	0.09	0.09	0.1	0	0	0.19	0	0	0	0	0	0.1	0.1	0.11	0	0.09	0	0	0	0.047	0.04	-0.2327	1
hsa-miR-4688	0.24	0.09	0.09	0.21	0.34	0.22	0.19	0.5	0.28	0.12	0.63	0	0.1	0.29	0.22	0.59	0.09	0	0.32	0.37	0.228	0.261	0.195	1
hsa-miR-1292-3p	0.12	0	0.18	0	0.52	0.22	0.1	0.12	0	0	0.27	0.3	0.2	0	0	0.1	0.09	0	0.11	0.37	0.126	0.144	0.1926	1
hsa-miR-4716-3p	0	0	0	0	0	0.11	0	0	0	0	0	0.1	0	0	0.11	0	0	0	0	0	0.011	0.021	0.9329	1
hsa-miR-6772-5p	0	0	0	0	0	0	0.1	0	0	0	0.18	0	0	0	0.11	0	0	0	0	0	0.01	0.029	1.5361	1
hsa-miR-5587-3p	0.24	0.09	0.27	0.1	0.09	0	0.1	0.12	0	0	0.27	0.1	0	0.2	0.22	0.2	0.09	0	0	0.19	0.101	0.127	0.3305	1
hsa-miR-3940-5p	0	0	0	0	0.09	0	0	0	0	0.12	0	0	0.1	0	0	0.2	0.09	0	0	0	0.021	0.039	0.8931	1
hsa-miR-617	0	0	0	0	0	0	0	0	0	0.12	0	0	0	0	0	0	0	0	0	0	0.012	0	-0.263	1
hsa-miR-3619-5p	0	0	0	0	0	0	0	0.12	0	0	0	0	0	0	0	0	0	0	0	0	0.012	0	-0.263	1
hsa-miR-4750-3p	0	0	0.09	0	0	0.11	0	0	0	0	0	0	0	0.1	0	0.1	0.09	0	0	0	0.02	0.029	0.5361	1
hsa-miR-548ai	0	0.38	0.36	0.42	0.68	0.44	0.38	0	0.38	0	0.18	0.2	0.2	0.2	0.22	0.2	0.56	1.06	0.42	0	0.304	0.324	0.0919	1
hsa-miR-6069	0	0	0	0	0	0	0	0	0	0	0	0	0	0	0	0	0	0	0	0	0	0	0	1
hsa-miR-4417	0	0	0	0	0	0	0	0	0	0	0	0	0	0	0	0	0	0	0	0	0	0	0	1
hsa-miR-4471	0	0	0	0	0	0	0	0	0	0	0	0	0	0	0	0	0	0	0	0	0	0	0	1
hsa-miR-6742-3p	0	0.09	0	0	0	0	0	0	0	0.12	0.09	0	0	0	0.11	0	0	0	0	0	0.021	0.02	-0.0704	1
hsa-miR-718	0	0	0	0	0	0	0	0	0	0	0	0	0	0	0	0	0	0	0	0	0	0	0	1
hsa-miR-3682-5p	0	0	0	0	0	0	0	0	0	0	0	0	0	0	0	0	0	0.09	0	0	0	0.009	-0.152	1
hsa-miR-548b-3p	0	0	0	0	0.09	0	0	0	0	0	0.18	0	0	0	0	0	0	0	0	0	0.009	0.018	1	1
hsa-miR-4514	0	0	0	0	0	0	0	0	0	0	0	0	0	0	0	0	0	0	0	0	0	0	0	1
hsa-miR-4535	0	0	0	0	0	0	0	0	0	0	0	0	0	0	0	0	0	0	0	0	0	0	0	1
hsa-miR-527	0	0	0	0	0	0	0	0	0	0	0	0	0	0	0	0	0	0	0	0	0	0	0	1
hsa-miR-6081	0	0	0	0	0	0	0	0	0	0	0	0	0	0	0	0	0	0	0	0	0	0	0	1
hsa-miR-302c-3p	0	0	0	0	0	0	0	0	0	0	0	0	0	0	0	0	0	0	0	0	0	0	0	1
hsa-miR-5047	0	0	0	0	0	0	0	0	0	0	0	0	0	0	0	0	0	0	0	0	0	0	0	1
hsa-miR-4463	0	0	0	0	0	0	0	0	0	0	0	0	0	0	0	0	0	0	0	0	0	0	0	1
hsa-miR-668-3p	0.6	0.09	0.54	0.21	0.77	0.65	0.29	0.87	0.19	1.04	1.16	0.9	0	0.59	0.66	1.19	0.47	0.35	0.21	0	0.525	0.553	0.075	1
hsa-miR-506-5p	0	0	0	0	0	0	0	0	0	0	0	0	0	0	0	0	0	0	0	0	0	0	0	1
hsa-miR-4311	0	0	0	0	0	0	0	0	0	0	0	0	0	0	0	0	0	0	0	0	0	0	0	1
hsa-miR-885-3p	0	0	0	0	0	0	0	0	0	0	0	0	0	0	0	0	0	0	0	0	0	0	0	1
hsa-miR-6781-3p	0	0	0	0	0.09	0	0	0	0	0	0.09	0	0	0	0	0	0	0	0	0.19	0.009	0.028	1.6374	1
hsa-miR-8054	0	0	0	0	0	0	0	0	0	0	0	0	0	0	0	0	0	0	0	0	0	0	0	1
hsa-miR-8064	0	0	0	0	0	0	0	0	0	0	0	0	0	0	0	0	0	0	0	0	0	0	0	1
hsa-miR-4764-3p	0	0	0	0	0	0	0	0	0	0	0	0	0	0	0	0	0	0	0	0	0	0	0	1
hsa-miR-373-3p	0	0	0	0	0	0	0.1	0	0	0	0	0	0	0	0	0	0	0	0.11	0	0.01	0.011	0.1375	1
hsa-miR-4666b	0	0	0	0	0	0	0	0	0	0	0	0	0	0	0	0	0	0	0	0	0	0	0	1
hsa-miR-4756-5p	0	0	0	0	0	0	0	0	0	0	0	0	0	0	0	0	0	0	0	0	0	0	0	1
hsa-miR-4528	0	0	0	0	0	0	0	0	0	0	0	0	0	0	0	0	0	0	0	0	0	0	0	1
hsa-miR-3622b-3p	0	0	0	0	0	0	0	0	0	0	0	0	0	0	0	0	0	0	0	0	0	0	0	1
hsa-miR-103b	0	0	0	0	0	0	0	0	0	0	0	0	0	0	0	0	0	0	0	0	0	0	0	1
hsa-miR-3677-5p	0	0	0.09	0	0.09	0	0.39	0	0	0.12	0.18	0	0	0.1	0	0.1	0.09	0	0	0.19	0.069	0.066	-0.0641	1
hsa-miR-135b-3p	0	0	0	0	0	0.11	0	0	0	0	0	0	0	0	0	0	0	0	0	0	0.011	0	-0.1375	1
hsa-miR-4777-5p	0	0	0	0	0	0	0	0	0	0	0	0	0	0	0	0	0	0	0	0	0	0	0	1
hsa-miR-215-3p	0	0	0	0	0	0	0	0	0	0	0	0	0	0	0	0	0	0.09	0	0	0	0.009	-0.152	1
hsa-miR-8085	0	0	0	0	0	0	0	0	0	0	0	0	0	0	0	0	0	0	0	0	0	0	0	1
hsa-miR-4519	0	0	0	0	0	0	0	0	0	0	0	0	0	0	0	0	0	0	0	0	0	0	0	1
hsa-miR-4267	0	0	0	0	0	0	0	0	0	0	0	0	0	0	0	0	0	0	0	0	0	0	0	1
hsa-miR-4769-3p	0	0	0	0	0	0	0	0	0.09	0	0	0	0	0	0	0	0.09	0	0	0	0.009	0.009	0	1
hsa-miR-380-5p	0.12	0	0	0	0.26	0	0	0	0.28	0.12	0.18	0.3	0	0	0	0.3	0.09	0	0	0	0.078	0.087	0.1575	1
hsa-miR-663a	0	0	0	0	0	0	0	0	0	0	0	0	0	0	0	0	0	0	0	0	0	0	0	1
hsa-miR-759	0	0	0	0	0	0	0	0	0	0	0	0	0	0	0	0	0	0	0	0	0	0	0	1
hsa-miR-3921	0	0	0	0	0	0	0	0	0	0	0	0	0	0	0	0	0	0	0	0	0	0	0	1
hsa-miR-4536-3p	0	0.09	0	0	0	0	0	0	0	0	0	0	0	0	0	0	0	0	0.11	0	0.009	0.011	0.2895	1
hsa-miR-203a-5p	0	0	0	0	0	0	0	0	0	0	0	0	0	0	0	0	0	0	0	0	0	0	0	1
hsa-miR-1200	0	0	0	0	0	0	0	0	0	0	0	0	0	0	0	0	0	0	0	0	0	0	0	1
hsa-miR-4652-5p	0	0	0	0	0	0	0	0	0	0	0	0	0	0	0	0	0	0	0	0	0	0	0	1
hsa-miR-6076	0	0	0	0	0	0	0	0	0	0	0	0	0	0	0	0	0	0	0	0	0	0	0	1
hsa-miR-4308	0	0	0	0	0	0	0	0	0	0	0	0	0	0	0	0	0	0	0	0	0	0	0	1
hsa-miR-8068	0	0	0	0	0	0	0	0	0	0	0	0	0	0	0	0	0	0	0	0	0	0	0	1
hsa-miR-3925-5p	0	0	0	0	0	0	0	0	0	0	0	0	0	0	0	0	0	0	0	0	0	0	0	1
hsa-miR-4518	0	0	0	0	0	0	0	0	0	0	0	0	0	0	0	0	0	0	0	0	0	0	0	1
hsa-miR-4707-5p	0	0.28	0.36	0	0	0	0	0	0	0	0	0	0.3	0	0	0	0	0.27	0.11	0	0.064	0.068	0.0875	1
hsa-miR-4778-5p	0	0	0	0	0	0	0	0	0	0	0	0	0	0	0	0	0	0	0	0	0	0	0	1
hsa-miR-208a-5p	0	0	0	0	0	0	0	0	0	0	0	0	0	0	0	0	0	0	0	0	0	0	0	1
hsa-miR-3943	0	0	0	0	0	0	0	0	0	0	0	0	0	0	0	0	0	0	0	0	0	0	0	1
hsa-miR-6863	0	0	0	0	0	0	0	0	0	0	0	0	0	0	0	0	0	0	0	0	0	0	0	1
hsa-miR-4783-5p	0	0	0	0	0	0	0	0	0	0	0	0	0	0	0	0	0	0	0	0	0	0	0	1
hsa-miR-4769-5p	0	0	0	0	0	0	0	0.12	0	0	0.09	0	0	0	0	0	0	0	0	0	0.012	0.009	-0.415	1
hsa-miR-3911	0	0	0	0	0.17	0.43	0.19	0	0	0	0.18	0	0.1	0.2	0.11	0.2	0	0	0.11	0	0.079	0.09	0.1881	1
hsa-miR-5007-3p	0	0	0	0	0	0	0	0	0	0	0	0	0	0	0	0	0	0	0	0	0	0	0	1
hsa-miR-6739-3p	0	0.19	0.18	0.21	0.17	0	0.1	0	0	0	0.09	0.2	0.1	0.1	0	0.2	0.09	0.09	0.11	0	0.085	0.098	0.2053	1
hsa-miR-6737-5p	0	0	0	0	0	0	0	0	0	0	0	0	0	0	0	0	0	0	0	0	0	0	0	1
hsa-miR-4698	0	0	0	0	0	0	0	0	0	0	0	0	0	0	0	0	0	0	0	0	0	0	0	1
hsa-miR-4655-3p	0	0	0	0	0	0	0	0	0	0	0	0	0	0	0	0	0	0	0	0	0	0	0	1
hsa-miR-1973	0	0	0	0	0	0	0	0	0	0	0	0	0	0	0	0	0	0	0	0	0	0	0	1
hsa-miR-6510-5p	0	0	0	0	0	0	0	0	0	0	0	0	0	0	0	0	0	0	0	0	0	0	0	1
hsa-miR-497-3p	0	0	0	0	0	0	0	0	0	0	0	0	0	0	0	0	0	0	0	0	0	0	0	1
hsa-miR-3181	0	0	0	0	0	0	0.1	0	0	0	0	0	0	0.1	0	0	0	0	0	0	0.01	0.01	0	1
hsa-miR-4441	0	0	0	0	0	0	0	0	0	0	0	0	0	0	0	0	0	0	0	0	0	0	0	1
hsa-miR-5008-5p	0	0	0	0	0	0	0	0	0	0	0	0	0	0	0	0	0	0	0	0	0	0	0	1
hsa-miR-6083	0	0	0	0	0	0	0	0	0	0	0	0	0	0	0	0	0	0	0	0	0	0	0	1
hsa-miR-548y	0	0	0	0	0	0	0	0	0	0	0	0	0	0	0	0	0	0	0	0	0	0	0	1
hsa-miR-657	0	0	0	0	0	0	0	0	0	0	0	0	0	0	0	0	0	0	0	0	0	0	0	1
hsa-miR-1263	0	0	0	0	0	0	0	0	0	0	0	0	0	0	0	0	0	0	0	0	0	0	0	1
hsa-miR-1183	0	0	0	0	0	0	0	0	0	0	0	0	0	0	0	0	0	0	0	0	0	0	0	1
hsa-miR-1295b-5p	0	0	0	0	0	0	0	0	0	0	0	0	0	0	0	0	0	0	0	0	0	0	0	1
hsa-miR-887-5p	0	0	0	0	0	0	0	0	0	0	0	0	0	0	0	0	0	0	0	0	0	0	0	1
hsa-miR-638	0	0	0	0	0	0	0	0	0	0	0	0	0	0	0	0	0	0	0	0	0	0	0	1
hsa-miR-4693-3p	0	0	0	0	0	0	0	0	0	0	0	0	0	0	0	0	0	0	0	0	0	0	0	1
hsa-miR-6771-3p	0	0	0.09	0	0	0	0	0	0	0	0	0	0	0	0	0.1	0	0	0	0	0.009	0.01	0.152	1
hsa-miR-4329	0	0	0	0	0	0	0	0	0	0	0	0	0	0	0	0	0	0	0	0	0	0	0	1
hsa-miR-6801-5p	0	0	0	0	0	0	0	0	0	0	0	0	0	0	0	0	0	0	0	0	0	0	0	1
hsa-miR-4279	0	0	0	0	0	0	0	0	0	0	0	0	0	0	0	0	0	0	0	0	0	0	0	1
hsa-miR-645	0	0	0	0	0	0	0	0	0	0	0	0	0	0	0	0	0	0	0	0	0	0	0	1
hsa-miR-4282	0	0	0	0	0	0	0	0	0	0	0	0	0	0	0	0	0	0	0	0	0	0	0	1
hsa-miR-587	0	0	0	0	0	0	0	0	0	0	0	0	0	0	0	0	0	0	0	0	0	0	0	1
hsa-miR-3657	0	0	0	0	0	0	0	0	0	0	0	0	0	0	0	0	0	0	0	0	0	0	0	1
hsa-miR-4436b-3p	0	0	0	0	0	0	0	0	0	0	0	0	0	0	0	0	0	0	0	0	0	0	0	1
hsa-miR-1202	0	0	0	0	0	0	0	0	0	0	0	0	0	0	0	0	0	0	0	0	0	0	0	1
hsa-miR-1587	0	0	0.09	0	0	0	0	0	0	0	0	0	0	0	0	0	0	0	0	0	0.009	0	0.152	1
hsa-miR-596	0	0	0	0	0	0	0	0	0	0	0	0	0	0	0	0	0	0	0	0	0	0	0	1
hsa-miR-4633-5p	0	0	0	0	0	0	0	0	0	0	0	0	0	0	0	0	0	0	0	0	0	0	0	1
hsa-miR-508-5p	0	0	0	0	0.09	0	0.1	0	0	0	0	0	0	0	0	0	0	0	0	0.19	0.019	0.019	0	1
hsa-miR-4762-5p	0	0	0	0	0	0	0	0	0	0.12	0	0	0	0	0	0	0	0.18	0	0	0.012	0.018	0.585	1
hsa-miR-4711-5p	0	0	0	0	0	0	0	0	0	0	0	0	0	0	0	0	0	0	0	0	0	0	0	1
hsa-miR-6887-5p	0	0	0	0	0	0	0	0	0	0	0	0	0	0	0	0	0	0	0	0	0	0	0	1
hsa-miR-5089-3p	0	0	0.18	0.21	0.09	0	0.1	0	0	0	0.09	0	0.1	0	0	0	0	0	0	0.56	0.058	0.075	0.3708	1
hsa-miR-6715a-3p	0	0	0	0	0	0	0	0	0	0	0	0	0	0	0	0	0	0	0	0	0	0	0	1
hsa-miR-3132	0	0	0	0	0	0	0	0	0	0	0	0	0	0	0	0	0	0	0	0	0	0	0	1
hsa-miR-302f	0	0	0	0	0	0	0	0	0	0	0	0	0	0	0	0	0	0	0	0	0	0	0	1
hsa-miR-1912	0	0	0	0	0	0	0	0	0	0	0	0	0	0	0	0	0	0	0	0	0	0	0	1
hsa-miR-6132	0	0	0	0	0	0	0	0	0	0	0	0	0	0	0	0	0	0	0	0	0	0	0	1
hsa-miR-7150	0	0	0	0	0	0	0	0	0	0	0	0	0	0	0	0	0	0	0	0	0	0	0	1
hsa-miR-1301-5p	0	0	0	0	0	0	0	0	0	0	0	0	0	0	0	0	0	0	0	0	0	0	0	1
hsa-miR-6830-5p	0	0	0	0	0	0	0	0	0	0	0	0	0	0	0	0	0	0	0	0	0	0	0	1
hsa-miR-7112-5p	0	0	0	0	0	0	0	0	0	0	0	0	0	0	0	0	0	0	0	0	0	0	0	1
hsa-miR-640	0	0	0	0	0	0	0	0	0	0	0	0	0	0	0	0	0	0	0	0	0	0	0	1
hsa-miR-5707	0	0	0	0	0	0	0	0	0	0	0	0	0	0	0	0	0	0	0	0	0	0	0	1
hsa-miR-208b-3p	0	0	0	0	0	0	0	0	0	0	0	0	0	0	0	0	0	0	0	0	0	0	0	1
hsa-miR-4452	0	0	0	0	0	0	0	0	0	0	0	0	0	0	0	0	0	0	0	0	0	0	0	1
hsa-miR-4745-5p	0.12	0	0.18	0.21	0.17	0.11	0	0.12	0	0	0.09	0	0.1	0.2	0	0.1	0	0	0.21	0.37	0.091	0.107	0.2337	1
hsa-miR-6504-5p	0	0	0	0	0	0	0	0	0	0	0	0	0	0	0	0	0	0	0	0	0	0	0	1
hsa-miR-1286	0	0	0	0	0	0	0	0.12	0	0	0	0	0.1	0	0	0	0	0	0	0	0.012	0.01	-0.263	1
hsa-miR-520a-3p	0	0.09	0	0	0	0	0	0	0	0	0	0	0	0	0.11	0	0	0	0	0	0.009	0.011	0.2895	1
hsa-miR-1471	0	0	0	0	0	0	0	0	0	0	0	0	0	0	0	0	0	0	0	0	0	0	0	1
hsa-miR-4684-3p	0	0	0	0	0	0	0	0	0	0	0	0	0	0	0	0	0	0	0	0	0	0	0	1
hsa-miR-3142	0	0	0	0	0	0	0	0	0.18	0	0	0	0	0	0.22	0	0.18	0	0	0	0.018	0.04	1.152	1
hsa-miR-5002-3p	0	0	0	0	0	0	0	0	0	0	0	0	0	0	0	0	0	0	0	0	0	0	0	1
hsa-miR-5009-3p	0	0	0	0	0	0	0	0	0	0	0	0	0	0	0	0	0	0	0	0	0	0	0	1
hsa-miR-26a-1-3p	0.6	0.65	0.18	0.41	0.17	0	1.07	1.12	0.56	0.46	2.86	0.6	0.1	0.29	0.44	0.59	0.75	0.27	0.32	0.19	0.522	0.641	0.2963	1
hsa-miR-8072	0.12	0	0	0	0.09	0.11	0	0	0	0.12	0.09	0	0	0	0.11	0.1	0	0.09	0	0	0.044	0.039	-0.174	1
hsa-miR-6835-3p	0	0	0	0	0	0	0	0	0	0	0	0	0	0	0	0	0	0	0	0	0	0	0	1
hsa-miR-4700-5p	0.12	0.19	0.18	0.21	0.09	0.11	0	0.12	0	0	0	0	0.2	0.39	0	0	0	0	0.21	0.19	0.102	0.099	-0.0431	1
hsa-miR-564	0	0	0	0	0	0	0	0	0	0	0	0	0	0	0	0	0	0	0	0	0	0	0	1
hsa-miR-3908	0	0	0	0	0	0	0	0	0	0	0	0	0	0	0	0	0	0	0	0	0	0	0	1
hsa-miR-6090	0	0	0	0	0	0	0	0	0	0	0	0	0	0	0	0	0	0	0	0	0	0	0	1
hsa-miR-5589-3p	0	0	0	0	0	0	0	0	0	0	0	0	0	0	0	0	0	0	0	0	0	0	0	1
hsa-miR-762	0	0	0	0	0.09	0	0	0	0	0	0.09	0	0	0	0	0	0	0	0	0	0.009	0.009	0	1
hsa-miR-4281	0	0	0	0	0	0	0	0	0	0	0	0	0	0	0	0	0	0	0	0	0	0	0	1
hsa-miR-6756-5p	0	0	0	0	0	0	0	0	0	0	0	0	0	0	0	0	0	0	0	0	0	0	0	1
hsa-miR-7853-5p	0	0	0	0	0	0	0	0	0	0	0	0	0	0	0	0	0	0	0	0	0	0	0	1
hsa-miR-302b-3p	0	0	0	0	0	0	0	0	0	0	0	0	0	0	0	0	0	0	0	0	0	0	0	1
hsa-miR-208b-5p	0	0	0	0	0	0	0	0	0	0	0	0	0	0	0	0	0	0	0	0	0	0	0	1
hsa-miR-410-5p	0	0	0	0	0	0	0	0	0	0	0	0	0	0	0	0	0	0	0	0	0	0	0	1
hsa-miR-4530	0	0	0	0	0	0	0	0	0	0	0	0	0	0	0	0	0	0	0	0	0	0	0	1
hsa-miR-548bb-3p	0	0	0.09	0	0.09	0	0	0	0	0	0	0	0	0	0	0	0.09	0.09	0	0	0.018	0.018	0	1
hsa-miR-4423-3p	0	0	0	0	0	0	0	0	0	0.12	0	0	0	0	0	0	0.09	0	0	0	0.012	0.009	-0.415	1
hsa-miR-4656	0	0	0	0	0	0	0	0	0	0	0	0	0	0	0	0	0	0	0	0	0	0	0	1
hsa-miR-4524a-5p	0	0	0	0	0	0	0	0	0	0	0	0	0	0	0	0	0	0	0	0	0	0	0	1
hsa-miR-611	0	0	0	0	0	0	0	0	0	0	0	0	0	0	0	0	0	0	0	0	0	0	0	1
hsa-miR-153-5p	0	0	0	0.1	0	0	0	0	0	0	0	0	0	0	0	0	0	0	0	0	0.01	0	0	1
hsa-miR-1264	0	0	0	0	0	0	0	0	0	0	0	0	0	0	0	0	0	0	0	0	0	0	0	1
hsa-miR-1283	0	0	0	0	0	0	0	0	0	0	0	0	0	0	0	0	0	0	0	0	0	0	0	1
hsa-miR-591	0	0	0	0	0	0	0	0	0	0	0	0	0	0	0	0	0	0	0	0	0	0	0	1
hsa-miR-448	0	0	0	0	0	0	0	0	0	0	0	0	0	0	0	0	0	0	0	0	0	0	0	1
hsa-miR-6889-3p	0	0	0.09	0	0	0	0	0	0	0	0	0	0	0	0	0	0	0	0	0.19	0.009	0.019	1.078	1
hsa-miR-770-5p	0	0	0	0	0.09	0	0	0	0	0	0.09	0	0	0.1	0	0	0.09	0	0	0	0.009	0.028	1.6374	1
hsa-miR-6084	0	0	0	0	0	0	0	0	0	0	0	0	0	0	0	0	0	0	0	0	0	0	0	1
hsa-miR-5684	0.12	0.09	0	0.1	0	0.33	0.19	0.12	0.09	0.12	0.27	0.1	0.3	0.1	0.44	0	0.09	0	0.21	0	0.116	0.151	0.3804	1
hsa-miR-554	0	0	0	0	0	0	0	0	0	0	0	0	0	0	0	0	0	0	0	0	0	0	0	1
hsa-miR-1282	0	0	0	0	0	0	0	0	0	0	0	0	0	0	0	0	0	0	0	0	0	0	0	1
hsa-miR-5704	0	0	0	0	0	0	0	0	0	0	0	0	0	0	0	0	0	0	0	0	0	0	0	1
hsa-miR-4330	0	0	0	0	0	0	0	0	0	0	0	0	0	0	0	0	0	0	0	0	0	0	0	1
hsa-miR-3160-3p	0.24	0	0	0.21	0.09	0	0	0.12	0	0	0	0	0	0.1	0	0.1	0	0.27	0	0	0.066	0.047	-0.4898	1
hsa-miR-4761-5p	0	0	0	0	0	0	0	0	0	0	0	0	0	0	0	0	0	0	0	0	0	0	0	1
hsa-miR-3152-5p	0	0	0	0	0	0	0	0	0	0	0	0	0	0	0	0	0	0	0	0	0	0	0	1
hsa-miR-5579-3p	0	0	0	0	0	0	0	0	0	0	0	0	0	0	0	0	0	0	0	0	0	0	0	1
hsa-miR-520a-5p	0	0	0	0	0	0	0	0	0	0	0	0	0	0	0	0	0	0	0	0	0	0	0	1
hsa-miR-519a-3p	0	0	0	0	0	0	0	0	0	0	0	0	0	0	0	0	0	0	0	0	0	0	0	1
hsa-miR-138-1-3p	0	0	0	0.1	0.09	0	0	0	0	0	0	0	0.1	0	0	0	0.09	0	0	0	0.019	0.019	0	1
hsa-miR-525-5p	0	0	0	0	0	0	0	0	0	0	0	0	0	0	0	0	0	0	0	0	0	0	0	1
hsa-miR-4480	0	0	0	0	0	0	0	0	0	0	0	0	0	0	0	0	0	0	0	0	0	0	0	1
hsa-miR-4694-3p	0	0	0	0	0	0	0	0	0	0	0	0	0	0	0	0	0	0	0	0	0	0	0	1
hsa-miR-3152-3p	0	0	0	0	0	0	0	0	0	0	0	0	0	0	0	0	0	0	0	0	0	0	0	1
hsa-miR-3144-3p	0.12	0.09	0	0.1	0.34	0.22	0.1	0	0	0.12	0.09	0.2	0.3	0	0.33	0	0.09	0	0	0	0.109	0.101	-0.11	1
hsa-miR-670-5p	0	0	0	0	0	0	0	0	0	0	0	0	0	0	0	0	0	0	0	0	0	0	0	1
hsa-miR-5196-5p	0	0	0	0	0	0	0	0	0	0	0	0	0	0	0	0	0	0	0	0	0	0	0	1
hsa-miR-300	0	0	0	0	0	0	0	0	0	0	0	0	0	0	0	0	0	0	0	0	0	0	0	1
hsa-miR-136-3p	0.6	0.47	0.36	0.31	1.81	0.22	0.1	0.62	1.6	0.12	2.06	0.4	0.1	0.29	0.22	1.68	0.75	1.95	0.11	0	0.621	0.756	0.2838	1
hsa-miR-3689b-3p	0	0	0	0	0	0	0	0	0	0	0	0	0	0	0	0	0	0	0	0	0	0	0	1
hsa-miR-488-5p	0	0	0	0	0	0	0	0	0	0	0	0	0	0	0	0	0	0	0	0	0	0	0	1
hsa-miR-4298	0	0	0	0	0	0.11	0	0	0	0	0	0	0.1	0	0	0	0	0	0	0	0.011	0.01	-0.1375	1
hsa-miR-4474-5p	0	0	0	0	0	0	0	0	0	0	0	0	0	0	0	0	0	0	0	0	0	0	0	1
hsa-miR-548au-3p	0	0	0	0	0	0	0	0	0	0	0	0	0	0	0	0	0	0	0	0	0	0	0	1
hsa-miR-3919	0	0	0	0	0	0	0	0	0	0	0	0	0	0	0	0	0	0	0	0	0	0	0	1
hsa-miR-6845-5p	0	0	0	0	0	0.11	0	0	0	0	0	0	0	0	0	0	0	0	0	0	0.011	0	-0.1375	1
hsa-miR-6761-3p	0.12	0	0	0	0	0	0	0	0	0	0	0	0	0	0.11	0	0	0	0.11	0	0.012	0.022	0.8745	1
hsa-miR-661	0	0	0	0	0	0	0	0	0	0	0	0	0	0	0	0	0	0	0	0	0	0	0	1
hsa-miR-365a-5p	0.12	0	0.27	0.1	0.09	0.22	0	0.12	0	0.12	0.18	0.1	0	0.29	0.22	0.2	0	0	0.11	0	0.104	0.11	0.0809	1
hsa-miR-518a-3p	0	0	0	0	0	0	0	0	0	0	0	0	0	0	0	0	0	0	0	0	0	0	0	1
hsa-miR-548ao-5p	0	0	0	0	0	0	0	0	0	0	0	0	0	0	0	0	0	0	0	0	0	0	0	1
hsa-miR-6813-3p	0.12	0	0	0.21	0	0.11	0	0	0	0.12	0	0	0.1	0	0.11	0.1	0	0.09	0	0	0.056	0.04	-0.4854	1
hsa-miR-1281	0	0	0	0	0	0	0	0	0	0	0	0	0	0	0	0	0	0	0	0	0	0	0	1
hsa-miR-3672	0	0	0	0	0	0	0	0	0	0	0	0	0	0	0	0	0	0	0	0	0	0	0	1
hsa-miR-5787	0	0	0	0	0	0	0	0	0	0	0	0	0	0	0	0	0	0	0	0	0	0	0	1
hsa-miR-559	0	0	0	0	0	0	0	0	0.09	0	0	0	0	0	0	0	0	0	0	0	0.009	0	0.152	1
hsa-miR-4483	0	0	0	0	0	0	0	0	0	0	0	0	0	0	0	0	0	0	0	0	0	0	0	1
hsa-miR-5591-3p	0	0	0	0	0	0	0	0	0	0	0	0	0	0	0	0	0	0	0	0	0	0	0	1
hsa-miR-4704-5p	0	0	0	0	0	0	0	0	0	0	0	0	0	0	0	0	0	0	0	0	0	0	0	1
hsa-miR-606	0	0	0	0	0	0	0	0	0	0	0	0	0	0	0	0	0	0	0	0	0	0	0	1
hsa-miR-6733-3p	0	0	0.09	0.1	0.17	0	0.1	0	0	0	0	0.1	0.1	0.1	0.11	0.1	0.09	0	0	0	0.046	0.06	0.3833	1
hsa-miR-7156-5p	0	0	0	0	0	0	0	0	0	0	0	0	0	0	0	0	0	0	0	0	0	0	0	1
hsa-miR-4271	0	0	0	0	0	0	0	0	0	0	0	0	0	0	0	0	0	0	0	0	0	0	0	1
hsa-miR-8065	0	0	0	0	0	0	0	0	0	0	0	0	0	0	0	0	0	0	0	0	0	0	0	1
hsa-miR-5004-5p	0	0	0	0.1	0.09	0	0.1	0	0	0	0	0	0	0.1	0	0.2	0	0	0	0	0.029	0.03	0.0489	1
hsa-miR-4668-3p	0	0	0	0	0	0	0	0	0	0	0	0	0	0	0	0	0	0	0	0	0	0	0	1
hsa-miR-6769a-5p	0	0	0	0	0	0	0	0	0	0	0	0	0	0	0	0	0	0	0	0	0	0	0	1
hsa-miR-2682-3p	0	0	0	0	0	0	0	0	0	0	0	0	0	0	0	0	0	0	0	0	0	0	0	1
hsa-miR-4252	0	0	0	0	0	0	0	0	0	0	0	0	0	0	0	0	0	0	0	0	0	0	0	1
hsa-miR-6765-5p	0	0	0	0	0	0	0	0	0	0	0	0	0	0	0	0	0	0	0	0	0	0	0	1
hsa-miR-4268	0	0	0	0	0	0	0	0	0	0	0	0	0	0	0	0	0	0	0	0	0	0	0	1
hsa-miR-492	0	0	0	0	0	0	0	0	0	0	0	0	0	0	0	0	0	0	0	0	0	0	0	1
hsa-miR-200c-5p	0	0	0	0.1	0	0	0	0	0	0	0	0	0	0	0.11	0	0	0	0	0	0.01	0.011	0.1375	1
hsa-miR-5703	0	0	0	0	0	0	0	0	0	0	0	0	0	0	0	0	0	0	0	0	0	0	0	1
hsa-miR-6801-3p	0	0	0	0	0	0.11	0	0.12	0	0	0	0	0.1	0	0	0	0	0	0	0	0.023	0.01	-1.2016	1
hsa-miR-124-5p	0	0	0	0	0	0	0	0	0	0	0	0	0	0	0	0	0	0	0	0	0	0	0	1
hsa-miR-1208	0	0	0	0	0	0	0	0	0	0	0	0	0	0	0	0	0	0	0	0	0	0	0	1
hsa-miR-6866-3p	0.12	0.09	0.09	0	0.26	0	0	0	0	0.12	0	0.2	0	0.1	0	0	0	0	0	0.19	0.068	0.049	-0.4728	1
hsa-miR-1539	0	0	0.09	0	0	0	0	0	0	0	0	0	0	0	0	0	0	0	0	0	0.009	0	0.152	1
hsa-miR-1267	0	0	0	0	0	0	0	0	0	0	0	0	0	0	0	0	0	0	0	0	0	0	0	1
hsa-miR-4713-3p	0	0	0	0	0	0	0	0	0	0	0	0	0	0	0	0	0	0	0	0	0	0	0	1
hsa-miR-371a-3p	0	0	0	0	0	0	0	0	0	0	0	0	0	0	0	0	0	0	0	0	0	0	0	1
hsa-miR-1199-5p	0	0	0	0	0	0	0	0	0	0	0	0	0	0	0	0	0	0	0	0	0	0	0	1
hsa-miR-6500-5p	0	0	0	0	0	0	0	0	0	0	0	0	0	0	0	0	0	0	0	0	0	0	0	1
hsa-miR-3162-3p	0	0	0.09	0.1	0.09	0	0	0.12	0	0	0.09	0	0.3	0	0	0	0	0.09	0	0	0.04	0.048	0.263	1
hsa-miR-7108-5p	0	0	0	0	0	0	0	0	0	0	0	0	0	0	0	0	0	0	0	0	0	0	0	1
hsa-miR-1199-3p	0	0	0	0	0	0	0	0	0	0	0	0	0	0	0	0	0	0	0	0	0	0	0	1
hsa-miR-520d-5p	0	0	0	0	0	0	0	0	0	0	0	0	0	0	0	0	0	0	0	0	0	0	0	1
hsa-miR-5008-3p	0	0	0	0	0	0	0	0.12	0	0	0	0	0	0	0	0	0	0	0	0	0.012	0	-0.263	1
hsa-miR-4650-5p	0	0	0	0	0	0	0	0	0	0	0	0	0	0	0	0	0	0	0	0	0	0	0	1
hsa-miR-626	0	0	0	0	0	0	0	0	0	0	0	0	0	0	0	0	0	0	0	0	0	0	0	1
hsa-miR-4532	0	0	0	0	0	0	0	0	0	0	0	0	0	0	0	0	0	0	0	0	0	0	0	1
hsa-miR-2909	0	0	0	0	0	0	0	0	0	0	0	0	0	0	0	0	0	0	0	0	0	0	0	1
hsa-miR-4538	0	0	0	0	0	0	0	0	0	0	0	0	0	0	0	0	0	0	0	0	0	0	0	1
hsa-miR-4665-3p	0	0	0	0	0	0	0	0	0	0	0	0	0	0	0	0	0	0	0	0	0	0	0	1
hsa-miR-6864-3p	0	0	0	0	0	0	0	0	0	0	0	0	0	0	0	0	0	0	0	0	0	0	0	1
hsa-miR-6792-3p	0	0	0	0	0	0	0	0	0	0	0	0	0	0	0	0	0	0	0	0	0	0	0	1
hsa-miR-7160-3p	0	0	0	0	0	0	0	0	0	0	0	0	0	0	0	0	0	0	0	0	0	0	0	1
hsa-miR-3171	0	0	0	0	0	0	0	0	0	0	0	0	0	0	0	0	0	0	0	0	0	0	0	1
hsa-miR-6844	0	0	0	0	0	0	0	0	0	0	0	0	0	0	0	0	0	0	0	0	0	0	0	1
hsa-miR-6784-5p	0	0	0	0	0	0	0	0	0	0	0	0	0	0	0	0	0	0	0	0	0	0	0	1
hsa-miR-4643	0	0	0	0	0	0	0	0	0	0	0	0	0	0	0	0	0	0	0	0	0	0	0	1
hsa-miR-8069	0	0	0	0	0	0	0	0	0	0	0	0	0	0	0	0	0	0	0	0	0	0	0	1
hsa-miR-4261	0	0	0	0	0	0	0	0	0	0	0	0	0	0	0	0	0	0	0	0	0	0	0	1
hsa-miR-662	0	0	0	0	0	0	0	0	0	0	0	0	0	0	0	0	0	0	0	0	0	0	0	1
hsa-miR-5681b	0	0	0	0	0	0	0	0	0	0	0	0	0	0	0	0	0	0	0	0	0	0	0	1
hsa-miR-889-5p	0	0	0.09	0.1	0.09	0	0	0.12	0	0	0.09	0	0.1	0	0	0	0	0.09	0	0	0.04	0.028	-0.5146	1
hsa-miR-4255	0	0	0	0	0	0	0	0	0	0	0	0	0	0	0	0	0	0	0	0	0	0	0	1
hsa-miR-504-3p	0	0	0	0	0.09	0	0	0	0	0	0	0.1	0	0	0	0	0	0	0	0	0.009	0.01	0.152	1
hsa-miR-6762-5p	0	0	0	0	0.09	0	0	0.12	0.09	0.12	0	0	0.2	0	0	0.2	0	0	0	0	0.042	0.04	-0.0704	1
hsa-miR-4788	0	0	0	0	0	0	0	0	0	0	0	0	0	0	0	0	0	0	0	0	0	0	0	1
hsa-miR-494-5p	0	0	0	0	0.17	0	0	0.12	0	0.23	0	0	0	0	0.11	0.1	0.37	0	0	0	0.052	0.058	0.1575	1
hsa-miR-4445-5p	0	0	0	0	0	0	0	0	0	0	0	0	0	0	0	0	0	0	0	0	0	0	0	1
hsa-miR-7160-5p	0	0	0	0	0	0	0	0	0	0	0	0	0	0	0	0	0	0	0	0	0	0	0	1
hsa-miR-6795-5p	0	0	0	0	0	0	0	0	0	0	0	0	0	0	0	0	0	0	0	0	0	0	0	1
hsa-miR-6817-5p	0	0	0	0	0	0	0	0	0	0	0	0	0	0	0	0	0	0	0	0	0	0	0	1
hsa-miR-6796-3p	0	0	0	0	0.17	0	0	0	0	0.12	0	0	0.3	0	0	0	0	0	0	0	0.029	0.03	0.0489	1
hsa-miR-6727-5p	0	0	0	0.1	0	0	0	0	0	0	0.09	0	0.1	0.1	0	0	0	0	0	0	0.01	0.029	1.5361	1
hsa-miR-570-5p	0	0.38	0.36	0.42	0.68	0.44	0.38	0	0.38	0	0.18	0.2	0.2	0.2	0.22	0.2	0.56	1.06	0.42	0	0.304	0.324	0.0919	1
hsa-miR-7159-5p	0	0	0	0	0	0	0	0	0	0	0	0	0	0	0	0	0	0	0	0	0	0	0	1
hsa-miR-3915	0	0	0	0	0	0	0	0	0	0	0	0	0	0	0	0	0	0	0	0	0	0	0	1
hsa-miR-383-3p	0	0	0	0	0	0	0	0	0	0	0	0	0	0	0	0	0	0	0	0	0	0	0	1
hsa-miR-6870-5p	0	0	0	0	0	0	0	0	0	0	0	0	0	0	0	0	0	0	0	0	0	0	0	1
hsa-miR-5692c	0	0	0	0	0	0	0	0	0	0	0	0	0	0	0	0	0	0	0	0	0	0	0	1
hsa-miR-4288	0	0	0	0	0	0	0	0	0	0	0	0	0	0	0	0	0	0	0	0	0	0	0	1
hsa-miR-5088-3p	0	0	0	0	0	0	0	0	0	0	0	0	0	0	0	0	0	0	0	0	0	0	0	1
hsa-miR-3646	0	0	0	0	0	0	0	0	0	0	0	0	0	0	0	0	0	0	0	0	0	0	0	1
hsa-miR-4771	0	0	0	0	0	0	0	0	0	0	0	0	0	0	0	0	0	0	0	0	0	0	0	1
hsa-miR-890	0	0	0	0	0	0	0	0	0	0	0	0	0	0	0	0	0	0	0	0	0	0	0	1
hsa-miR-205-5p	0	0.09	0	0	0	0	0	0	0	0	0	0	0	0	0	0	0	0	0	0	0.009	0	0.152	1
hsa-miR-4703-5p	0	0	0	0	0	0	0	0	0	0	0	0	0	0	0	0	0	0	0	0	0	0	0	1
hsa-miR-6761-5p	0	0.09	0	0.1	0	0.11	0.1	0	0	0	0.09	0	0	0.1	0	0.2	0	0	0.11	0	0.04	0.05	0.3219	1
hsa-miR-630	0	0	0	0	0	0	0	0	0	0	0	0	0	0	0	0	0	0	0	0	0	0	0	1
hsa-miR-4303	0	0	0	0	0	0	0	0	0	0	0	0	0	0	0	0	0	0	0	0	0	0	0	1
hsa-miR-1180-5p	0	0	0	0	0	0	0	0	0	0	0	0	0	0	0	0	0	0	0	0	0	0	0	1
hsa-miR-4321	0	0	0	0	0	0	0	0	0	0	0	0	0	0	0	0	0	0	0	0	0	0	0	1
hsa-miR-6728-3p	0	0	0	0	0	0	0	0	0	0	0	0	0	0	0	0	0	0	0	0	0	0	0	1
hsa-miR-3185	0	0	0	0	0	0	0	0	0	0	0	0	0	0	0	0	0	0	0	0	0	0	0	1
hsa-miR-4300	0	0	0	0	0	0	0	0	0	0	0	0	0	0	0	0	0	0	0	0	0	0	0	1
hsa-miR-4699-5p	0	0	0	0	0	0	0	0	0	0	0	0	0	0	0	0	0	0	0	0	0	0	0	1
hsa-miR-4501	0	0	0	0	0	0	0	0	0	0	0	0	0	0	0	0	0	0	0	0	0	0	0	1
hsa-miR-6499-5p	0	0	0	0	0	0	0	0	0	0	0	0	0	0	0	0	0	0	0	0	0	0	0	1
hsa-miR-7845-5p	0.12	0	0	0	0	0.11	0	0.12	0	0.12	0	0	0.2	0	0	0.1	0.09	0	0	0	0.047	0.039	-0.2692	1
hsa-miR-619-3p	0	0	0	0	0	0	0	0	0	0	0	0	0	0	0	0	0	0	0	0	0	0	0	1
hsa-miR-1343-5p	0	0	0	0	0	0	0	0	0	0	0	0	0	0	0	0	0	0	0	0	0	0	0	1
hsa-miR-4292	0	0	0	0	0	0	0	0	0	0	0	0	0	0	0	0	0	0	0	0	0	0	0	1
hsa-miR-514b-5p	0	0	0	0	0	0	0	0	0	0	0	0	0	0	0	0	0	0	0	0	0	0	0	1
hsa-miR-5739	0	0	0	0	0	0	0	0	0	0	0	0	0	0	0	0	0	0	0	0	0	0	0	1
hsa-miR-4800-5p	0	0	0	0	0	0	0	0.12	0	0	0	0	0	0	0	0	0	0	0	0	0.012	0	-0.263	1
hsa-miR-5590-3p	0	0	0	0	0	0	0	0	0	0	0	0	0	0	0	0	0	0	0	0	0	0	0	1
hsa-miR-4299	0	0	0	0	0	0	0	0	0	0	0	0	0	0	0	0	0	0	0	0	0	0	0	1
hsa-miR-503-3p	0.24	0.28	0	0.31	0	0.11	0.29	0.25	0	0.46	0.36	0	0.3	0.2	0.44	0.3	0.37	0	0.42	0	0.194	0.239	0.301	1
hsa-miR-452-3p	0	0	0	0	0	0	0	0	0	0	0	0	0	0	0	0	0	0	0	0	0	0	0	1
hsa-miR-3660	0	0	0	0	0	0	0	0	0	0	0	0	0	0	0	0	0	0	0	0	0	0	0	1
hsa-miR-648	0	0	0	0	0	0	0	0	0	0	0	0	0	0	0	0	0	0	0	0	0	0	0	1
hsa-miR-3167	0	0	0	0	0	0	0	0	0	0	0	0	0	0	0	0	0	0	0	0	0	0	0	1
hsa-miR-3925-3p	0	0	0	0	0	0	0	0	0	0	0	0	0	0	0	0	0	0	0	0	0	0	0	1
hsa-miR-3198	0.24	0	0.09	0.1	0.17	0	0.1	0.25	0.09	0.12	0.27	0	0	0.29	0.11	0.2	0	0	0.21	0.19	0.116	0.127	0.1307	1
hsa-miR-515-3p	0	0	0	0	0	0	0	0	0	0	0	0	0	0	0	0	0	0	0	0	0	0	0	1
hsa-miR-524-3p	0	0	0	0	0	0	0	0	0	0	0	0	0	0	0	0	0	0	0	0	0	0	0	1
hsa-miR-4260	0	0	0	0	0	0	0	0	0	0	0	0	0	0	0	0	0	0	0	0	0	0	0	1
hsa-miR-2053	0	0	0	0	0	0	0	0	0	0	0	0	0	0	0	0	0	0	0	0	0	0	0	1
hsa-miR-4701-3p	0.12	0	0	0	0.09	0	0	0	0	0	0.18	0.1	0	0	0	0	0	0	0	0	0.021	0.028	0.415	1
hsa-miR-5698	0	0	0.09	0.1	0	0.11	0	0	0	0.12	0	0	0	0	0.22	0.1	0	0	0.11	0.19	0.042	0.062	0.5619	1
hsa-miR-302d-5p	0	0	0	0	0	0	0	0	0	0	0	0	0	0	0	0	0	0	0	0	0	0	0	1
hsa-miR-6799-5p	0	0	0.09	0	0	0	0	0	0	0	0	0	0	0	0	0	0	0	0	0	0.009	0	0.152	1
hsa-miR-3117-3p	0.48	0.75	0.18	0.51	0.95	1.08	0.58	1.12	0.38	1.27	0.8	0.8	0.6	1.17	0.44	0.1	1.31	0.18	1.27	0.93	0.73	0.76	0.0581	1
hsa-miR-6800-3p	0	0	0	0	0.09	0	0	0	0	0	0.09	0	0.1	0	0	0	0.09	0	0	0	0.009	0.028	1.6374	1
hsa-miR-5692a	0	0	0	0	0	0	0	0	0	0	0	0	0	0	0	0	0	0	0	0	0	0	0	1
hsa-miR-524-5p	0	0	0	0	0	0	0	0	0	0	0	0	0	0	0	0	0	0	0	0	0	0	0	1
hsa-miR-6879-5p	0	0	0	0	0	0	0	0	0	0	0	0	0	0	0	0	0	0	0	0	0	0	0	1
hsa-miR-7153-5p	0	0	0	0	0	0	0	0	0	0	0	0	0	0	0	0	0	0	0	0	0	0	0	1
hsa-miR-4696	0	0	0	0	0	0	0	0	0	0	0	0	0	0	0	0	0	0	0	0	0	0	0	1
hsa-miR-6830-3p	0	0	0	0	0	0	0	0	0	0	0	0	0	0	0	0	0	0	0	0	0	0	0	1
hsa-miR-6089	0	0	0	0	0	0	0	0	0	0	0	0	0	0	0	0	0	0	0	0	0	0	0	1
hsa-miR-1245b-5p	0	0	0	0	0	0	0	0	0	0	0	0	0	0	0	0	0	0	0	0	0	0	0	1
hsa-miR-511-3p	0	0	0	0	0	0	0	0	0	0	0	0	0	0	0	0	0	0	0	0	0	0	0	1
hsa-miR-1225-5p	0	0	0	0	0	0	0	0	0	0	0	0	0	0	0	0	0	0	0	0	0	0	0	1
hsa-miR-3648	0	0	0	0	0	0	0	0	0	0.12	0	0	0	0	0	0	0	0	0	0	0.012	0	-0.263	1
hsa-miR-4713-5p	0	0	0	0	0	0	0	0	0	0	0	0	0	0	0	0	0	0	0	0	0	0	0	1
hsa-miR-3201	0	0	0	0	0	0	0	0	0	0	0	0	0	0	0	0	0	0	0	0	0	0	0	1
hsa-miR-4650-3p	0	0	0	0	0	0	0	0	0	0	0	0	0	0	0	0	0	0	0	0	0	0	0	1
hsa-miR-4736	0	0	0	0	0	0	0	0	0	0	0	0	0	0	0	0	0	0	0	0	0	0	0	1
hsa-miR-1207-5p	0	0	0	0	0	0	0	0	0	0	0	0	0	0	0	0	0	0	0	0	0	0	0	1
hsa-miR-6719-3p	0	0	0	0	0	0	0	0	0	0	0	0	0	0	0	0	0	0	0	0	0	0	0	1
hsa-miR-3977	0	0	0	0	0	0	0	0	0	0	0	0	0	0	0	0	0	0	0	0	0	0	0	1
hsa-miR-4462	0	0	0	0	0	0	0	0	0	0	0	0	0	0	0	0	0	0	0	0	0	0	0	1
hsa-miR-4275	0	0	0	0	0	0	0	0	0	0	0	0	0	0	0	0	0	0	0	0	0	0	0	1
hsa-miR-520e	0	0	0	0	0	0	0	0	0	0	0	0	0	0	0	0	0	0	0	0	0	0	0	1
hsa-miR-8079	0	0	0	0	0	0	0	0	0	0	0	0	0	0	0	0	0	0	0	0	0	0	0	1
hsa-miR-8087	0	0	0	0	0	0	0	0	0	0	0	0	0	0	0	0	0	0	0	0	0	0	0	1
hsa-miR-6499-3p	0	0	0	0	0	0	0	0	0	0	0	0	0	0	0	0	0	0	0	0	0	0	0	1
hsa-miR-1323	0	0	0	0	0	0	0	0	0	0	0	0	0	0	0	0	0	0	0	0	0	0	0	1
hsa-miR-924	0	0	0	0	0	0	0	0	0	0	0	0	0	0	0	0	0	0	0	0	0	0	0	1
hsa-miR-4784	0.12	0	0	0	0	0	0	0	0	0	0	0.1	0	0	0	0	0	0	0	0	0.012	0.01	-0.263	1
hsa-miR-3664-5p	0	0	0	0	0	0	0	0	0	0	0	0	0	0	0	0	0	0	0	0	0	0	0	1
hsa-miR-6893-3p	0	0	0.09	0	0	0	0	0	0	0.12	0	0.1	0	0.1	0	0	0	0	0	0	0.021	0.02	-0.0704	1
hsa-miR-8053	0	0	0	0	0	0	0	0	0	0	0	0	0	0	0	0	0	0	0	0	0	0	0	1
hsa-miR-6768-3p	0	0	0	0	0	0	0	0	0	0	0	0	0	0	0	0	0	0	0	0	0	0	0	1
hsa-miR-633	0	0	0	0	0	0	0	0	0	0	0	0	0	0	0	0	0	0	0	0	0	0	0	1
hsa-miR-6744-5p	0	0	0	0	0	0	0	0	0	0	0	0	0	0	0	0	0	0	0	0	0	0	0	1
hsa-miR-3927-3p	0	0	0	0	0	0	0	0	0	0	0	0	0	0	0	0	0	0	0	0	0	0	0	1
hsa-miR-3155b	0.12	0	0	0	0.17	0	0.1	0.12	0	0.12	0.18	0	0.1	0	0	0.2	0.28	0	0	0	0.063	0.076	0.2706	1
hsa-miR-4456	0	0	0	0	0	0	0	0	0.09	0	0	0	0	0	0	0	0	0	0	0	0.009	0	0.152	1
hsa-miR-891b	0	0	0	0	0	0	0	0	0	0	0	0	0	0	0	0	0	0	0	0	0	0	0	1
hsa-miR-4450	0	0	0	0	0	0	0	0	0	0	0	0	0	0	0	0	0	0	0	0	0	0	0	1
hsa-miR-3945	0	0	0	0	0	0	0	0	0	0	0	0	0	0	0	0	0	0	0	0	0	0	0	1
hsa-miR-7153-3p	0	0	0	0	0	0	0	0	0	0	0	0	0	0	0	0	0	0	0	0	0	0	0	1
hsa-miR-548c-3p	0.12	0	0	0	0	0	0	0	0	0	0	0	0	0	0	0	0	0.18	0	0	0.012	0.018	0.585	1
hsa-miR-4644	0	0	0	0	0	0	0	0.25	0	0.12	0	0	0	0.1	0	0.2	0	0	0	0	0.037	0.03	-0.3026	1
hsa-miR-892c-3p	0	0	0	0	0	0	0	0	0	0	0	0	0	0	0	0	0	0	0	0	0	0	0	1
hsa-miR-4697-5p	0	0	0	0	0	0	0	0	0	0	0	0	0	0	0	0	0	0	0	0	0	0	0	1
hsa-miR-519c-3p	0	0	0	0	0	0	0	0	0	0	0	0	0	0	0	0	0	0	0	0	0	0	0	1
hsa-miR-8055	0	0	0	0	0	0	0	0	0	0	0	0	0	0	0	0	0	0	0	0	0	0	0	1
hsa-miR-4719	0	0	0	0	0	0	0	0	0.09	0	0	0	0	0	0	0	0	0	0	0	0.009	0	0.152	1
hsa-miR-656-5p	0	0	0	0	0	0	0	0.12	0	0	0.09	0	0	0	0	0	0	0	0	0	0.012	0.009	-0.415	1
hsa-miR-6080	0	0	0	0	0	0	0	0	0	0	0	0	0	0	0	0	0	0	0	0	0	0	0	1
hsa-miR-4738-5p	0	0	0	0	0	0	0	0	0	0	0	0	0	0	0	0	0	0	0	0	0	0	0	1
hsa-miR-4760-3p	0	0	0	0	0	0	0	0	0	0	0	0	0	0	0	0	0	0	0	0	0	0	0	1
hsa-miR-4251	0	0	0	0	0	0	0	0	0	0	0	0	0	0	0	0	0	0	0	0	0	0	0	1
hsa-miR-4778-3p	0	0	0	0	0	0	0	0	0	0	0	0	0	0	0	0	0	0	0	0	0	0	0	1
hsa-miR-8080	0	0	0	0	0	0	0	0	0	0	0	0	0	0	0	0	0	0	0	0	0	0	0	1
hsa-miR-6070	0	0	0	0	0	0	0	0	0	0	0	0	0	0	0	0	0	0	0	0	0	0	0	1
hsa-miR-4273	0	0	0	0	0	0	0	0	0	0	0	0	0	0	0	0	0	0	0	0	0	0	0	1
hsa-miR-4790-3p	0	0	0	0	0	0	0	0	0	0	0	0	0	0	0	0	0	0	0	0	0	0	0	1
hsa-miR-6833-3p	1.43	2.99	1.17	1.34	1.38	2.6	2.33	1.62	0.47	1.85	2.06	1.11	2.21	2.64	2.3	1.39	2.8	0.62	1.91	1.67	1.718	1.871	0.1231	1
hsa-miR-6502-5p	0.24	0.19	0	0	0.6	0	0.29	0	0	0.12	0.72	0	0.1	0.2	0.44	0.1	0.09	0	0	0.19	0.144	0.184	0.3536	1
hsa-miR-4524a-3p	0	0.09	0	0	0	0	0	0	0	0	0	0	0	0	0.11	0	0.09	0	0	0	0.009	0.02	1.152	1
hsa-miR-4294	0	0	0	0	0	0	0	0	0	0	0	0	0	0	0	0	0	0	0	0	0	0	0	1
hsa-miR-8078	0	0	0	0	0	0	0	0	0	0	0	0	0	0	0	0	0	0	0	0	0	0	0	1
hsa-miR-1470	0	0	0	0	0	0	0	0	0	0	0	0	0	0	0	0	0	0	0	0	0	0	0	1
hsa-miR-6780b-3p	0	0.19	0	0.1	0.09	0.43	0.1	0.25	0	0.35	0.09	0.2	0.4	0.2	0.11	0.3	0	0	0.11	0.19	0.151	0.16	0.0835	1
hsa-miR-367-5p	0	0	0	0	0	0	0	0	0	0	0	0	0	0	0	0	0	0	0	0	0	0	0	1
hsa-miR-33b-5p	0	0	0	0	0	0	0	0.12	0	0.12	0.09	0	0.1	0.1	0	0	0	0	0	0	0.024	0.029	0.273	1
hsa-miR-6124	0	0	0	0	0	0	0	0	0	0	0	0	0	0	0	0	0	0	0	0	0	0	0	1
hsa-miR-378j	0.24	0	0	0.1	0.09	0	0.1	0.12	0	0.23	0.18	0.2	0.1	0	0	0.1	0.09	0.18	0.11	0	0.088	0.096	0.1255	1
hsa-miR-4648	0	0	0	0	0	0	0	0	0	0	0	0	0	0	0	0	0	0	0	0	0	0	0	1
hsa-miR-518a-5p	0	0	0	0	0	0	0	0	0	0	0	0	0	0	0	0	0	0	0	0	0	0	0	1
hsa-miR-3926	0	0	0	0	0	0	0	0	0	0	0	0	0	0	0	0	0	0	0	0	0	0	0	1
hsa-miR-6079	0	0	0	0	0	0	0	0	0	0	0	0	0	0	0	0	0	0	0	0	0	0	0	1
hsa-miR-6755-5p	0.6	0.65	0.27	0.72	0.17	1.19	0.19	0.75	0.09	0.35	0.54	0.8	0.8	0.39	0.55	0.5	0.28	0.18	0.95	0.19	0.498	0.518	0.0568	1
hsa-miR-5186	0	0	0	0	0	0	0	0	0	0	0	0	0	0	0	0	0	0	0	0	0	0	0	1
hsa-miR-571	0	0	0	0	0	0	0	0	0	0	0	0	0	0	0	0	0	0	0	0	0	0	0	1
hsa-miR-1206	0	0	0	0	0	0	0	0	0	0	0	0	0	0	0	0	0	0	0	0	0	0	0	1
hsa-miR-4706	0	0	0	0.1	0	0	0.1	0.12	0	0.12	0	0.1	0	0.29	0	0	0	0	0.11	0	0.044	0.05	0.1844	1
hsa-miR-1468-3p	0	0	0	0	0	0	0	0	0	0	0	0	0	0	0	0	0	0	0	0	0	0	0	1
hsa-miR-196a-3p	0	0	0	0	0	0	0	0	0	0	0	0	0	0	0	0	0	0	0	0	0	0	0	1
hsa-miR-4447	0	0	0	0	0	0	0	0	0	0	0	0	0	0	0	0	0	0	0	0	0	0	0	1
hsa-miR-1182	0	0	0	0	0	0	0	0	0	0	0	0	0	0	0	0	0	0	0	0	0	0	0	1
hsa-miR-4318	0	0	0	0	0	0	0	0	0	0	0	0	0	0	0	0	0	0	0	0	0	0	0	1
hsa-miR-5087	0	0	0	0	0	0	0	0	0	0	0	0	0	0	0	0	0	0	0	0	0	0	0	1
hsa-miR-3910	0	0	0	0	0.09	0.11	0	0	0	0	0.09	0.1	0	0	0	0	0	0	0	0	0.02	0.019	-0.074	1
hsa-miR-6756-3p	0	0	0	0	0	0	0	0	0	0	0	0	0	0	0	0	0	0	0	0	0	0	0	1
hsa-miR-489-5p	0	0	0	0	0	0	0	0	0	0	0	0	0	0	0	0	0	0	0	0	0	0	0	1
hsa-miR-1321	0	0	0	0	0	0	0	0	0	0	0	0	0	0	0	0	0	0	0	0	0	0	0	1
hsa-miR-1227-5p	0	0	0	0	0	0	0	0	0	0	0	0	0	0	0	0	0	0	0	0	0	0	0	1
hsa-miR-6791-5p	0	0	0	0.1	0	0	0	0	0	0.12	0.09	0	0.1	0	0	0	0	0.09	0	0	0.022	0.028	0.3479	1
hsa-miR-1250-3p	0	0	0	0	0	0	0	0	0	0	0	0	0	0	0	0	0	0	0	0	0	0	0	1
hsa-miR-6074	0	0	0	0	0	0	0	0	0	0	0	0	0	0	0	0	0	0	0	0	0	0	0	1
hsa-miR-548bb-5p	0	0	0.27	0	0.09	0.11	0.1	0	0	0.12	0.09	0	0.2	0	0	0	0.09	0.18	0.11	0	0.069	0.067	-0.0424	1
hsa-miR-5587-5p	0	0	0	0	0.17	0	0.1	0	0	0	0.36	0	0.1	0	0	0	0.09	0	0	0	0.027	0.055	1.0265	1
hsa-miR-5191	0	0	0	0	0	0	0	0	0	0	0	0	0	0	0	0	0	0	0	0	0	0	0	1
hsa-miR-3679-5p	0.24	0.56	0.09	0	0.17	0.43	0.58	0.87	0	0.46	0.98	0.2	0.7	0.49	0.44	0	0.28	0	0.74	0	0.34	0.383	0.1718	1
hsa-miR-3976	0	0	0	0	0	0	0	0	0	0	0	0	0	0	0	0	0	0	0	0	0	0	0	1
hsa-miR-3917	0	0	0.09	0	0	0	0	0	0	0	0.09	0	0	0	0.11	0	0.09	0	0	0	0.009	0.029	1.6881	1
hsa-miR-634	0	0	0	0	0	0	0	0	0	0	0	0	0	0	0	0	0	0	0	0	0	0	0	1
hsa-miR-383-5p	0	0	0	0	0	0	0	0	0	0	0	0	0	0	0	0	0	0	0	0	0	0	0	1
hsa-miR-208a-3p	0	0	0	0	0	0	0	0	0	0	0	0	0	0	0	0	0	0	0	0	0	0	0	1
hsa-miR-6872-5p	0	0	0	0	0	0	0	0	0	0	0	0	0	0	0	0	0	0	0	0	0	0	0	1
hsa-miR-4262	0	0	0	0	0	0	0	0	0	0	0	0	0	0	0	0	0	0	0	0	0	0	0	1
hsa-miR-3606-5p	0	0	0	0	0	0	0	0	0	0	0	0	0	0	0	0	0	0	0	0	0	0	0	1
hsa-miR-5011-5p	0	0	0	0	0	0	0	0	0	0	0	0	0	0	0	0	0	0	0	0	0	0	0	1
hsa-miR-6085	0	0	0	0	0	0	0	0	0	0	0	0	0	0	0	0	0	0	0	0	0	0	0	1
hsa-miR-4422	0.12	0	0	0	0	0	0	0.12	0.19	0	0.18	0	0	0	0.11	0.1	0	0	0.11	0	0.043	0.05	0.2176	1
hsa-miR-3136-3p	0	0.09	0	0	0	0	0	0.12	0	0	0	0	0	0	0	0	0.09	0.09	0	0	0.021	0.018	-0.2224	1
hsa-miR-372-5p	0	0	0	0	0	0	0	0	0	0	0	0	0	0	0	0	0	0	0	0	0	0	0	1
hsa-miR-6757-5p	0	0	0	0	0	0	0	0	0	0	0	0	0	0	0	0	0	0	0	0	0	0	0	1
hsa-miR-6506-3p	0	0	0	0	0	0	0	0	0	0	0	0	0	0	0	0	0	0	0	0	0	0	0	1
hsa-miR-583	0	0	0	0	0	0	0	0	0	0	0	0	0	0	0	0	0	0	0	0	0	0	0	1
hsa-miR-1915-3p	0	0	0	0	0	0	0	0	0	0	0	0	0	0	0	0	0	0	0	0	0	0	0	1
hsa-miR-6870-3p	0	0	0	0	0	0	0	0	0	0	0	0	0	0	0	0	0	0	0	0	0	0	0	1
hsa-miR-7154-3p	0	0	0	0	0	0	0	0	0	0	0	0	0	0	0	0	0	0	0	0	0	0	0	1
hsa-miR-556-5p	0.95	0.28	0.18	0.31	0.34	0.33	0.48	0.25	1.22	0.12	0.63	0.1	0.2	0.29	0.66	1.68	0.93	0.71	0.11	0.19	0.446	0.55	0.3024	1
hsa-miR-4724-3p	0	0	0	0	0	0	0	0	0	0	0	0	0	0	0	0	0	0	0	0	0	0	0	1
hsa-miR-6515-3p	0.12	0	0	0	0	0.22	0	0.25	0	0.12	0.18	0	0.3	0.1	0	0.1	0	0	0	0	0.071	0.068	-0.0623	1
hsa-miR-519d-3p	0.12	0	0	0	0	0	0.19	0.12	0	0	0	0.1	0	0.1	0.11	0	0	0	0	0	0.043	0.031	-0.4721	1
hsa-miR-5590-5p	0	0	0	0	0	0	0	0	0	0	0	0	0	0	0	0	0	0	0	0	0	0	0	1
hsa-miR-8084	0	0	0	0	0	0	0	0	0	0	0	0	0	0	0	0	0	0	0	0	0	0	0	1
hsa-miR-5581-5p	0	0	0	0	0	0	0	0	0	0	0	0	0	0	0	0	0	0	0	0	0	0	0	1
hsa-miR-4496	0	0	0	0	0	0	0	0	0	0	0	0	0	0	0	0	0	0	0	0	0	0	0	1
hsa-miR-4746-3p	0	0	0	0	0	0	0	0	0	0	0	0	0	0	0	0	0	0	0	0	0	0	0	1
hsa-miR-498	0	0	0	0	0	0	0	0	0	0	0	0	0	0	0	0	0	0	0	0	0	0	0	1
hsa-miR-4314	0	0	0	0	0	0	0	0	0	0	0	0	0	0	0	0	0	0	0	0	0	0	0	1
hsa-miR-4782-3p	0	0	0	0	0	0	0	0	0	0	0	0	0	0	0	0	0	0	0	0	0	0	0	1
hsa-miR-3689a-3p	0	0	0	0	0	0	0	0	0	0	0	0	0	0	0	0	0	0	0	0	0	0	0	1
hsa-miR-137	0	0	0	0	0	0	0	0	0	0	0	0	0	0	0	0	0	0	0	0	0	0	0	1
hsa-miR-567	0	0	0	0	0	0	0	0	0	0	0	0	0	0	0	0	0	0	0	0	0	0	0	1
hsa-miR-6860	0	0	0	0	0	0	0	0	0	0	0	0	0	0	0	0	0	0	0	0	0	0	0	1
hsa-miR-4276	0	0	0	0	0	0	0	0	0	0	0	0	0	0	0	0	0	0	0	0	0	0	0	1
hsa-miR-647	0	0	0	0	0	0	0	0	0	0	0	0	0	0	0	0	0	0	0	0	0	0	0	1
hsa-miR-5688	0	0	0	0	0	0	0	0	0	0	0	0	0	0	0	0	0	0	0	0	0	0	0	1
hsa-miR-520f-3p	0	0	0	0	0	0	0.1	0.25	0.09	0	0.09	0	0	0	0	0	0.28	0	0	0	0.044	0.037	-0.25	1
hsa-miR-181b-3p	0	0	0	0	0	0	0	0.12	0.28	0	0.18	0	0	0	0	0.1	0.09	0.35	0	0	0.04	0.072	0.848	1
hsa-miR-8485	0	0	0	0	0	0.11	0.19	0	0	0.23	0.09	0	0.2	0	0	0	0	0.18	0	0	0.053	0.047	-0.1733	1
hsa-miR-4731-3p	0	0	0	0	0.09	0	0	0	0	0	0	0	0.1	0	0	0	0	0	0	0	0.009	0.01	0.152	1
hsa-miR-4780	0	0	0	0	0	0	0	0	0	0	0	0	0	0	0	0	0	0	0	0	0	0	0	1
hsa-miR-4419a	0	0	0	0	0	0	0	0	0	0	0	0	0	0	0	0	0	0	0	0	0	0	0	1
hsa-miR-8067	0	0	0	0	0	0	0	0	0	0	0	0	0	0	0	0	0	0	0	0	0	0	0	1
hsa-miR-203b-5p	0	0	0	0	0	0	0	0	0	0	0	0	0	0	0	0	0	0	0	0	0	0	0	1
hsa-miR-566	0	0	0	0	0	0.11	0	0	0	0	0	0	0	0	0	0.1	0	0	0	0	0.011	0.01	-0.1375	1
hsa-miR-5589-5p	0	0	0	0	0	0	0	0	0	0	0	0	0	0	0	0	0	0	0	0	0	0	0	1
hsa-miR-621	0	0	0	0	0	0	0	0	0	0	0	0	0	0	0	0	0	0	0	0	0	0	0	1
hsa-miR-6778-5p	0	0	0	0	0	0	0	0	0	0	0	0	0	0	0	0	0	0	0	0	0	0	0	1
hsa-miR-6865-5p	0.12	0	0	0	0	0.11	0	0	0	0	0.09	0	0.1	0	0	0	0	0	0.11	0	0.023	0.03	0.3833	1
hsa-miR-1266-3p	0	0	0	0	0	0	0	0	0	0	0	0	0	0	0	0	0	0	0	0	0	0	0	1
hsa-miR-4312	0	0	0	0	0	0	0	0	0	0	0	0	0	0	0	0	0	0	0	0	0	0	0	1
hsa-miR-6880-5p	0	0	0	0	0	0	0	0	0	0	0	0	0	0	0	0	0	0	0	0	0	0	0	1
hsa-miR-601	0	0	0	0	0	0	0	0	0	0	0	0	0	0	0	0	0	0	0	0	0	0	0	1
hsa-miR-6788-3p	0	0	0	0	0.09	0	0	0.12	0	0.23	0.18	0	0	0	0.11	0.1	0	0	0.21	0	0.044	0.06	0.4475	1
hsa-miR-3914	0	0	0	0	0	0	0	0	0	0	0	0	0	0	0	0	0	0	0	0	0	0	0	1
hsa-miR-8066	0	0	0	0	0	0	0	0	0	0	0	0	0	0	0	0	0	0	0	0	0	0	0	1
hsa-miR-599	0	0	0	0	0	0	0	0	0	0	0	0	0	0	0	0	0	0	0	0	0	0	0	1
hsa-miR-553	0	0	0	0	0	0	0	0	0	0	0	0	0	0	0	0	0	0	0	0	0	0	0	1
hsa-miR-3151-3p	0	0	0	0	0	0	0	0	0	0	0	0	0	0	0	0	0	0	0	0	0	0	0	1
hsa-miR-4465	0	0	0	0	0	0	0	0	0	0	0	0	0	0	0	0	0	0	0	0	0	0	0	1
hsa-miR-1324	0	0	0	0	0	0	0	0	0	0	0	0	0	0	0	0	0	0	0	0	0	0	0	1
hsa-miR-653-5p	0	0	0	0	0	0	0	0	0	0	0	0	0	0	0	0	0	0	0	0	0	0	0	1
hsa-miR-3129-5p	0	0	0	0	0	0	0	0	0	0	0	0	0	0	0	0	0	0	0	0	0	0	0	1
hsa-miR-4506	0	0	0	0	0	0	0	0	0	0	0	0	0	0	0	0	0	0	0	0	0	0	0	1
hsa-miR-3591-3p	0	0	0	0	0	0	0	0	0	0	0	0	0	0	0	0	0	0	0	0	0	0	0	1
hsa-miR-4472	0	0	0	0	0	0	0	0	0	0	0	0	0	0	0	0	0	0	0	0	0	0	0	1
hsa-miR-7843-5p	0	0	0	0	0.09	0	0	0	0	0	0.09	0	0	0	0	0	0	0	0	0.19	0.009	0.028	1.6374	1
hsa-miR-4697-3p	0	0	0	0	0	0	0.19	0	0	0	0.09	0	0	0.1	0	0	0	0	0.11	0	0.019	0.03	0.659	1
hsa-miR-155-3p	0	0	0	0	0	0	0	0	0	0	0	0	0	0	0	0	0	0	0	0	0	0	0	1
hsa-miR-1231	0	0	0	0	0	0	0	0	0	0	0	0	0	0	0	0	0	0	0	0	0	0	0	1
hsa-miR-6849-3p	0.36	0.09	0.09	0.1	0.09	0.11	0	0	0	0	0.09	0	0.3	0.1	0	0.3	0.09	0	0	0	0.084	0.088	0.0671	1
hsa-miR-5583-5p	0	0	0	0	0	0	0	0	0	0	0	0	0	0	0	0	0	0.09	0	0	0	0.009	-0.152	1
hsa-miR-4313	0	0	0	0	0	0	0	0	0	0	0	0	0	0	0	0	0	0	0	0	0	0	0	1
hsa-miR-3621	0	0	0	0	0	0	0	0	0	0	0	0	0	0	0	0	0	0	0	0	0	0	0	1
hsa-miR-4278	0	0	0	0	0	0	0	0	0	0	0	0	0	0	0	0	0	0	0	0	0	0	0	1
hsa-miR-613	0	0	0	0	0	0	0	0	0	0	0	0	0	0	0	0	0	0	0	0	0	0	0	1
hsa-miR-4782-5p	0	0	0	0	0	0	0	0	0	0	0	0	0	0	0	0	0	0	0	0	0	0	0	1
hsa-miR-499a-3p	0	0	0	0	0.09	0	0	0	0	0	0	0	0	0	0	0	0	0.09	0.11	0	0.009	0.02	1.152	1
hsa-miR-4633-3p	0	0	0	0	0	0	0	0	0	0	0	0	0	0	0	0	0	0	0	0	0	0	0	1
hsa-miR-3145-5p	0	0	0	0	0	0	0	0	0	0	0	0	0	0	0	0	0	0	0	0	0	0	0	1
hsa-miR-376a-2-5p	0	0	0	0	0	0	0	0	0	0	0	0	0	0	0	0	0	0	0.11	0	0	0.011	0.1375	1
hsa-miR-376b-3p	0	0	0	0	0	0	0	0	0	0	0	0	0	0	0	0	0	0	0	0	0	0	0	1
hsa-miR-6811-5p	0	0	0	0	0	0	0	0	0	0	0	0	0	0	0	0	0	0	0	0	0	0	0	1
hsa-miR-7975	0	0	0	0	0	0	0	0	0	0	0	0	0	0	0	0	0	0	0	0	0	0	0	1
hsa-miR-8070	0	0	0	0	0	0	0	0	0	0	0	0	0	0	0	0	0	0	0	0	0	0	0	1
hsa-miR-3529-3p	0	0	0	0	0	0	0	0	0	0	0	0	0	0	0	0	0	0	0	0	0	0	0	1
hsa-miR-3153	0	0	0	0	0	0	0	0	0	0	0	0	0	0	0	0	0	0	0	0	0	0	0	1
hsa-miR-585-5p	0	0	0	0	0	0	0	0	0	0	0	0	0	0	0	0	0	0	0	0	0	0	0	1
hsa-miR-376a-5p	0	0	0	0	0.17	0.22	0	0.12	0	0.35	0.36	0.1	0.2	0	0.22	0.1	0.09	0	0	0	0.086	0.107	0.3152	1
hsa-miR-5687	0	0	0	0	0	0	0	0	0	0	0	0	0	0	0	0	0	0	0	0	0	0	0	1
hsa-miR-4527	0	0	0	0	0	0	0	0	0	0	0	0	0	0	0	0	0	0	0	0	0	0	0	1
hsa-miR-6858-5p	0	0	0	0	0	0	0	0	0	0	0	0	0	0	0	0	0	0	0	0	0	0	0	1
hsa-miR-302e	0	0	0	0	0	0	0	0	0	0	0	0	0	0	0	0	0	0	0	0	0	0	0	1
hsa-miR-6812-5p	0	0	0.09	0	0	0	0	0	0	0	0.09	0	0	0.1	0	0	0.09	0	0	0	0.009	0.028	1.6374	1
hsa-miR-6816-5p	0	0	0	0	0	0	0	0	0	0	0	0	0	0	0	0	0	0	0	0	0	0	0	1
hsa-miR-3622a-3p	0	0	0	0	0	0	0	0	0	0	0	0	0	0	0	0	0	0	0	0	0	0	0	1
hsa-miR-3606-3p	0	0	0	0	0	0	0	0	0	0	0	0	0	0	0	0	0	0	0	0	0	0	0	1
hsa-miR-608	0	0	0	0	0	0	0	0	0	0	0	0	0	0	0	0	0	0	0	0	0	0	0	1
hsa-miR-4289	0	0	0	0	0	0	0	0	0	0	0	0	0	0	0	0	0	0	0	0	0	0	0	1
hsa-miR-4520-2-3p	0	0.09	0	0	0	0	0	0.12	0	0	0	0	0	0	0	0	0	0	0	0.19	0.021	0.019	-0.1444	1
hsa-miR-2054	0	0	0	0	0	0	0	0	0	0	0	0	0	0	0	0	0	0	0	0	0	0	0	1
hsa-miR-875-5p	0	0	0	0	0	0	0	0	0	0	0	0	0	0	0	0	0	0	0	0	0	0	0	1
hsa-miR-3134	0	0	0	0	0	0	0	0	0.38	0	0.09	0	0	0	0	0.1	0	0.44	0	0	0.038	0.063	0.7294	1
hsa-miR-95-5p	0	0	0	0	0	0	0	0	0	0	0	0	0	0	0	0	0	0	0	0	0	0	0	1
hsa-miR-483-5p	0	0.19	0.09	0	0.09	0.22	0	0.12	0	0	0.09	0.1	0	0.1	0.22	0.1	0	0	0	0.19	0.071	0.08	0.1722	1
hsa-miR-219a-2-3p	0	0	0	0.1	0	0	0	0	0	0	0.09	0	0	0	0	0	0	0	0	0	0.01	0.009	-0.152	1
hsa-miR-4799-3p	0	0	0	0	0	0	0	0	0	0	0	0	0	0	0	0	0	0	0	0	0	0	0	1
hsa-miR-558	0	0	0	0	0	0	0	0	0	0	0	0	0	0	0	0	0	0	0	0	0	0	0	1
hsa-miR-3913-3p	0	0.09	0	0	0	0	0	0	0	0	0	0	0	0.1	0	0	0	0	0	0	0.009	0.01	0.152	1
hsa-miR-1265	0	0	0	0	0	0	0	0	0	0	0	0	0	0	0	0	0	0	0	0	0	0	0	1
hsa-miR-4663	0	0	0	0	0	0.22	0	0	0	0	0	0.1	0	0.1	0	0	0	0	0	0	0.022	0.02	-0.1375	1
hsa-miR-4283	0	0	0	0	0	0	0	0	0	0	0	0	0	0	0	0	0	0	0	0	0	0	0	1
hsa-miR-6775-5p	0	0	0	0	0	0	0	0	0	0	0	0	0	0	0	0	0	0	0	0	0	0	0	1
hsa-miR-4287	0	0	0	0	0	0	0	0	0	0	0	0	0	0	0	0	0	0	0	0	0	0	0	1
[truncated: 590 more rows]
